# Supplementary material for: Guided relaxation-based virtual reality versus distraction-based virtual reality or passive control for postoperative pain management in children and adolescents undergoing Nuss repair of pectus excavatum: protocol for a prospective, randomised, controlled trial (FOREVR Peds trial)
Source: PubMed Central journal article supplement — BMJ Open. 2020 Dec 30;10(12):e040295. doi: 10.1136/bmjopen-2020-040295 (PMC7780540; doi:10.1136/bmjopen-2020-040295), 2020-12-30
Supplement: bmjopen-2020-040295.draft_revisions.pdf [file bmjopen-2020-040295.draft_revisions.pdf]

# BMJ Open

BMJ Open is committed to open peer review. As part of this commitment we make the peer review history of every article we publish publicly available.

When an article is published we post the peer reviewers' comments and the authors' responses online. We also post the versions of the paper that were used during peer review. These are the versions that the peer review comments apply to.

The versions of the paper that follow are the versions that were submitted during the peer review process. They are not the versions of record or the final published versions. They should not be cited or distributed as the published version of this manuscript.

BMJ Open is an open access journal and the full, final, typeset and author-corrected version of record of the manuscript is available on our site with no access controls, subscription charges or pay-per-view fees (<http://bmjopen.bmj.com>).

If you have any questions on BMJ Open's open peer review process please email [info.bmjopen@bmj.com](mailto:info.bmjopen@bmj.com)

# BMJ Open

**Guided relaxation-based virtual reality versus distraction-based virtual reality or passive control for postoperative pain management in children and adolescents undergoing Nuss repair of pectus excavatum: protocol for a prospective, randomized, controlled trial (FOREVR Peds trial)**

|                               |                                                                                                                                                                                                                                                                                                                                                                                                                                                                                                                                                                                                                                                                                                                                                                                                                                                                                                                    |
|-------------------------------|--------------------------------------------------------------------------------------------------------------------------------------------------------------------------------------------------------------------------------------------------------------------------------------------------------------------------------------------------------------------------------------------------------------------------------------------------------------------------------------------------------------------------------------------------------------------------------------------------------------------------------------------------------------------------------------------------------------------------------------------------------------------------------------------------------------------------------------------------------------------------------------------------------------------|
| Journal:                      | <i>BMJ Open</i>                                                                                                                                                                                                                                                                                                                                                                                                                                                                                                                                                                                                                                                                                                                                                                                                                                                                                                    |
| Manuscript ID                 | bmjopen-2020-040295                                                                                                                                                                                                                                                                                                                                                                                                                                                                                                                                                                                                                                                                                                                                                                                                                                                                                                |
| Article Type:                 | Protocol                                                                                                                                                                                                                                                                                                                                                                                                                                                                                                                                                                                                                                                                                                                                                                                                                                                                                                           |
| Date Submitted by the Author: | 09-May-2020                                                                                                                                                                                                                                                                                                                                                                                                                                                                                                                                                                                                                                                                                                                                                                                                                                                                                                        |
| Complete List of Authors:     | Olbrecht, Vanessa A. ; Cincinnati Children's Hospital Medical Center, Anesthesia<br>Williams, Sara; Cincinnati Children's Hospital Medical Center, Behavioral Medicine and Clinical Psychology<br>O'Connor, Keith; Cincinnati Children's Hospital Medical Center, Anesthesia<br>Boehmer, Chloe; Cincinnati Children's Hospital Medical Center, Anesthesia<br>Marchant, Gilbert; Cincinnati Children's Hospital Medical Center, Anesthesiology<br>Glynn, Susan; Cincinnati Children's Hospital Medical Center, Anesthesia<br>Geisler, Kristie; Cincinnati Children's Hospital Medical Center, Anesthesia<br>Ding, Lili; Cincinnati Children's Hospital Medical Center, Biostatistics and Epidemiology<br>Yang, Gang; Cincinnati Children's Hospital Medical Center, Biostatistics and Epidemiology<br>King, Christopher; Cincinnati Children's Hospital Medical Center, Behavioral Medicine and Clinical Psychology |
| Keywords:                     | Pain management < ANAESTHETICS, Paediatric anaesthesia < ANAESTHETICS, COMPLEMENTARY MEDICINE, Paediatric thoracic surgery < PAEDIATRIC SURGERY, Clinical trials < THERAPEUTICS                                                                                                                                                                                                                                                                                                                                                                                                                                                                                                                                                                                                                                                                                                                                    |
|                               |                                                                                                                                                                                                                                                                                                                                                                                                                                                                                                                                                                                                                                                                                                                                                                                                                                                                                                                    |

SCHOLARONE™  
Manuscripts

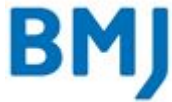

I, the Submitting Author has the right to grant and does grant on behalf of all authors of the Work (as defined in the below author licence), an exclusive licence and/or a non-exclusive licence for contributions from authors who are: i) UK Crown employees; ii) where BMJ has agreed a CC-BY licence shall apply, and/or iii) in accordance with the terms applicable for US Federal Government officers or employees acting as part of their official duties; on a worldwide, perpetual, irrevocable, royalty-free basis to BMJ Publishing Group Ltd ("BMJ") its licensees and where the relevant Journal is co-owned by BMJ to the co-owners of the Journal, to publish the Work in this journal and any other BMJ products and to exploit all rights, as set out in our [licence](#).

The Submitting Author accepts and understands that any supply made under these terms is made by BMJ to the Submitting Author unless you are acting as an employee on behalf of your employer or a postgraduate student of an affiliated institution which is paying any applicable article publishing charge ("APC") for Open Access articles. Where the Submitting Author wishes to make the Work available on an Open Access basis (and intends to pay the relevant APC), the terms of reuse of such Open Access shall be governed by a Creative Commons licence – details of these licences and which [Creative Commons](#) licence will apply to this Work are set out in our licence referred to above.

Other than as permitted in any relevant BMJ Author's Self Archiving Policies, I confirm this Work has not been accepted for publication elsewhere, is not being considered for publication elsewhere and does not duplicate material already published. I confirm all authors consent to publication of this Work and authorise the granting of this licence.

1  
2  
3 **Guided relaxation-based virtual reality versus distraction-based virtual reality or passive**  
4 **control for postoperative pain management in children and adolescents undergoing Nuss**  
5 **repair of pectus excavatum: protocol for a prospective, randomized, controlled trial**  
6 **(FOREVR Peds trial)**  
7  
8

9  
10 Vanessa A. Olbrecht, MD, MBA,<sup>\*1,2,3,5</sup> Sara E. Williams, PhD,<sup>1,4,5</sup> Keith T. O'Connor, BS,<sup>2,3</sup>  
11 Chloe O. Boehmer,<sup>2</sup> Gilbert W. Marchant, BS,<sup>2,3</sup> Susan M. Glynn BA, CCRP,<sup>2</sup> Kristie J. Geisler,  
12 BS, CCRP,<sup>2</sup> Lili Ding, PhD,<sup>3,5,6</sup> Gang Yang, PhD,<sup>3,5,6</sup> Christopher D. King, PhD<sup>1,4,5</sup>  
13  
14  
15

16 **Affiliations:**

17  
18 <sup>1</sup>*Center for Understanding Pediatric Pain (CUPP), Cincinnati Children's, Cincinnati, Ohio,*  
19 *USA.*

20  
21 <sup>2</sup>*Department of Anesthesiology, Cincinnati Children's Hospital Medical Center, Cincinnati,*  
22 *Ohio, USA.*

23  
24 <sup>3</sup>*University of Cincinnati College of Medicine, Cincinnati, Ohio, USA.*

25  
26 <sup>4</sup>*Division of Behavioral Medicine and Clinical Psychology, Cincinnati Children's, Cincinnati,*  
*Ohio, USA.*

27  
28 <sup>5</sup>*Department of Pediatrics, University of Cincinnati, College of Medicine, Cincinnati, Ohio,*  
29 *USA.*

30  
31 <sup>6</sup>*Division of Biostatistics and Epidemiology, Cincinnati Children's Hospital Medical Center*  
32 *Cincinnati OH 45229, USA.*  
33  
34

35 **Corresponding Author:**

36  
37 Vanessa A. Olbrecht, MD, MBA  
38 Cincinnati Children's Hospital Medical Center  
39 Department of Anesthesiology  
40 3333 Burnet Avenue, MLC 2001  
41 Cincinnati, OH 45229, USA  
42 Telephone: (513) 213-1107  
43 Fax: (513) 636-7337  
44 Email: [Vanessa.Olbrecht@cchmc.org](mailto:Vanessa.Olbrecht@cchmc.org)  
45  
46  
47

48 **Key words:** Postoperative pain, virtual reality (VR), guided relaxation-based virtual reality (VR-  
49 GR), pediatric anesthesia, pediatric pain  
50  
51  
52

53 **Word Count:** 3,764 words (excluding title page, abstract, references, figures and tables)  
54  
55  
56  
57  
58  
59  
60

## ABSTRACT

**Introduction** Virtual reality (VR) offers an innovative method to deliver nonpharmacological pain management. Distraction-based VR (VR-D) using immersive games to redirect attention has shown short-term pain reductions in various settings. To create lasting pain reduction, VR-based strategies must go beyond distraction. Guided relaxation-based VR (VR-GR) integrates pain-relieving mind-body based guided relaxation with VR, a novel therapy delivery mechanism. The primary aim of this study is to assess the impact of daily VR-GR, VR-D, and 360 video (passive control) on pain intensity and opioid consumption. We will also assess the impact of these interventions on pain unpleasantness, anxiety, and benzodiazepine consumption. The secondary aim of this study will assess the impact of psychological factors (anxiety sensitivity, pain catastrophizing) on pain following VR.

**Methods and analysis** This is a single center, prospective, randomized, clinical trial. Ninety children/adolescents, ages 8 to 18 years, presenting for Nuss repair of pectus excavatum will be randomized to 1 of 3 study arms (VR-GR, VR-D, 360 video). Patients will use the Starlight Xperience (Google Daydream) VR suite for 10-minutes. Patients randomized to VR-GR (n=30) will engage in guided relaxation/mindfulness with the Aurora application. Patients randomized to VR-D (n=30) will play 1 of 3 distraction-based games, and those randomized to the 360 video (n=30) will watch the Aurora application without audio instructions or sound. Primary outcomes are pain intensity and opioid consumption. Secondary outcomes include pain unpleasantness, anxiety, and benzodiazepine consumption.

**Ethics and dissemination** This study follows SPIRIT guidelines. The protocol was approved by the Cincinnati Children's Hospital Medical Center Institutional Review Board. The trial has not yet begun recruiting (recruitment to begin July 2020). Written informed consent will be obtained for all participants. All information acquired will be disseminated via scientific meetings and published in peer-reviewed journals.

**Trial registration number** ClinicalTrials.gov [NCT04351776](https://clinicaltrials.gov/ct2/show/study/NCT04351776), registered April 3, 2020.

## ARTICLE SUMMARY

### *Strengths and limitations of this study*

- This is a prospective, randomized clinical trial, which provides the best clinical evidence and support for VR as an intervention.
- This is the first study examining the use of VR-based interventions in a postoperative pediatric population.
- Due to the nature of the study, it cannot be blinded.
- One limitation is the specific patient population being studied: children and adolescents between the ages of 8 and 18 years undergoing Nuss repair of pectus excavatum. Patient selection may limit generalizability of findings.
- A second limitation is the conduction of the study at an academic, tertiary care, pediatric hospital; as such, these results may not be generalizable to patients in other clinical settings.

## INTRODUCTION

### Background and rationale

Children and adolescents with pain are at risk of opioid abuse,<sup>1</sup> and many are initially exposed to narcotics prescribed to treat pain.<sup>2</sup> Pectus excavatum, a depression of the anterior chest wall, is often corrected via the Nuss repair, a minimally invasive procedure in which a bar(s) is inserted beneath the sternum and flipped to elevate the chest.<sup>3</sup> Although minimally invasive, this procedure is associated with significant postoperative pain.<sup>4</sup> Despite efforts at multimodal therapy, the percentage of patients experiencing severe pain after surgery has not changed over the last 20 years.<sup>5, 6</sup> Multimodal pain management requires the exploration of safe, effective, nonpharmacological strategies that reduce pain and opioid consumption.<sup>7</sup>

Virtual reality (VR) may offer a safe, innovative, nonpharmacological tool with the potential to decrease pain and medication consumption. Children and adolescents are at risk of persistent pain and opioid use after surgery.<sup>8, 9</sup> While this risk is well documented in adults, few studies address this topic in children.<sup>10</sup> Existing pediatric studies have identified an approximately 20% incidence of persistent postsurgical pain beyond what is expected from surgery alone.<sup>11</sup> While 80% of these patients recover within one month, 20% maintain a reduced quality of life secondary to persistent pain.<sup>11</sup> A recent retrospective study of opioid-naïve surgical patients found persistent opioid use in 4.8% of adolescents vs. 0.1% in a matched, nonsurgical cohort.<sup>8</sup> Using opioids for as little as 5 days increases the risk of long-term use.<sup>12</sup> However, the consequences of ineffective postoperative pain management are significant and associated with increased morbidity, poorer physical functioning, longer recovery, and higher economic cost.<sup>13, 14</sup> As such, novel, nonpharmacological methods to treat pain can both improve analgesia after surgery and decrease opioid exposure, a risk factor for future addiction.<sup>1, 2</sup>

VR provides an immersive, multisensory, three-dimensional (3D) environment that enables individuals to have modified experiences of reality by creating a sense of “presence,” making it an excellent candidate for distraction-based therapy.<sup>15</sup> Distraction-based virtual reality (VR-D) has been used during painful procedures, the postoperative period, and labor to help decrease pain by redirecting attention.<sup>16-28</sup> These studies show short-term decreases in pain, but this transient reduction is insufficient to treat prolonged acute pain experiences,<sup>29, 30</sup> including postoperative pain. Comparatively, nonpharmacological alternatives that utilize mind-body based

1  
2  
3 therapies delivered in a traditional format, like relaxation and slow breathing, are able to  
4 decrease anxiety and pain in children undergoing surgery.<sup>31</sup> However, despite their efficacy,  
5 these therapies are fraught with challenges, such as barriers to accessing care, high cost, need for  
6 multiple visits, and provider shortages.<sup>32</sup> VR can increase accessibility to these mind-body  
7  
8 therapies and enhance acceptability, motivation, and adherence in pediatric patients compared to  
9  
10 methods without VR.<sup>33</sup> Combining strategies of traditional mind-body therapies, like relaxation  
11  
12 and slow breathing, with the immersive nature of VR opens new possibilities for multimodal  
13  
14 analgesia in the pediatric population and has the potential to simultaneously minimize acute  
15  
16 postoperative pain and opioid consumption. Guided relaxation-based VR (VR-GR) is a  
17  
18 promising mechanism to deliver mind-body based therapy, improve postoperative pain control,  
19  
20 and avoid challenges common with mind-body therapies delivered in the traditional format.  
21  
22

23 We have designed a prospective, randomized, clinical trial to assess the efficacy of VR-GR to  
24 decrease pain, anxiety, and opioid consumption in children and adolescents undergoing Nuss  
25  
26 repair of pectus excavatum and hypothesize that VR-GR will be more effective at reducing pain,  
27  
28 anxiety, and opioid consumption in this population than VR-D or a passive control.  
29  
30

### 31 **Objectives**

32  
33 The primary objective of this study is to determine the impact of VR-GR on pain intensity and  
34  
35 opioid consumption in children and adolescents undergoing Nuss repair of pectus excavatum  
36  
37 compared to VR-D and 360 video both during the hospitalization and up to one month following  
38  
39 discharge. We will also assess the impact of VR-GR on pain unpleasantness, anxiety, and  
40  
41 benzodiazepine consumption compared to VR-D and 360 video. The secondary objective of this  
42  
43 study is to determine the role of anxiety sensitivity and pain catastrophizing on changes in pain  
44  
45 and anxiety following VR-GR, VR-D, and 360 video both during hospitalization and 1-month  
46  
47 post discharge in this same patient population using standard questionnaires.  
48

### 49 **METHODS AND ANALYSIS**

50 The FOREVR Peds study is a single center, prospective, unblinded, randomized clinical trial  
51  
52 with three groups: a daily, 10-minute session of VR-GR, VR-D or 360 video in children and  
53  
54 adolescents between the age of 8 and 18 years undergoing Nuss repair of pectus excavatum. The  
55  
56 primary objective is to determine the impact of VR-GR on pain intensity and opioid consumption  
57  
58



1  
2  
3 compared to VR-D and 360 video. Patient recruitment has not yet begun, and we anticipate a  
4 total study duration of two years. We anticipate patient recruitment to begin in July 2020. This  
5 study protocol complies with the SPIRIT Statement as well as the CONSORT Statement (Figure  
6 1). The study was registered at ClinicalTrials.gov (NCT04351776) on April 3, 2020 and all trial  
7 registration data can be found on the [ClinicalTrials.gov](https://clinicaltrials.gov) website.  
8  
9  
10  
11  
12

### 13 **Study setting**

14 Cincinnati Children's Hospital Medical Center (CCHMC), a tertiary care, academic, pediatric  
15 hospital.  
16  
17  
18

### 19 **Study design**

20 This is a single-center, prospective, randomized clinical trial of children and adolescents with  
21 acute postoperative pain following Nuss repair of pectus excavatum to assess the impact of  
22 multiple VR-GR sessions on pain and medication utilization in relation to patient anxiety and  
23 pain catastrophizing. Figure 1 summarizes the study design. We will assess the acute and long-  
24 term impact of each intervention on changes in pain intensity, pain unpleasantness, anxiety, and  
25 opioid and benzodiazepine consumption during hospitalization and following discharge. Figure 2  
26 summarizes this experimental design. All patients are managed postoperatively via the pectus  
27 surgery pain management protocol, which standardizes all non-controlled medications received  
28 by patients. Patients enrolled in this study will be managed per this protocol (standard care) and  
29 will receive the additional intervention of VR or 360 video.  
30  
31  
32  
33  
34  
35  
36  
37  
38

### 39 **Outcome measures**

#### 40 *Primary outcomes:*

41 Our primary outcome is pain intensity and opioid consumption following daily VR-GR, VR-D,  
42 and 360 video in our population during hospitalization and up to 1-month post-discharge.  
43  
44  
45

#### 46 *Secondary outcomes:*

47 Our secondary outcomes are pain unpleasantness, anxiety, and benzodiazepine consumption  
48 following daily VR-GR, VR-D, and 360 video in our population during hospitalization and up to  
49 1-month following discharge. We will also assess the impact of pain catastrophizing and anxiety  
50 sensitivity on these outcomes.  
51  
52  
53  
54  
55  
56  
57  
58  
59  
60

## Participants

We will recruit 90 adolescents (30 per group) between the age of 8 and 18 years undergoing Nuss repair of pectus excavatum. Eligibility criteria have been chosen to correspond with our prior work and result in a population with whom our group has substantial experience.

### *Inclusion Criteria:*

Patients will be included based on the following criteria: (a) Between the ages of 8 and 18 years; (b) Able to read, understand, and speak English; (c) Scheduled to undergo Nuss repair of pectus excavatum at CCHMC.

### *Exclusion criteria:*

Patients will be excluded for the following reasons: (a) Patients < 8 or > 18 years of age at the time study enrollment; (b) History of significant developmental delay, uncontrolled psychiatric conditions, or significant neurological conditions, including epilepsy, severe motion sickness, or active nausea/vomiting; (c) Conditions that preclude application and use of the VR device, including craniofacial abnormalities.

## Randomization

Eligible patients will be randomly assigned in a 1:1:1 fashion to the following three study groups: VR-GR, VR-D, and 360 video (passive control). Block randomization will be done using REDCap (<https://www.project-redcap.org/>), a secure web application for building and maintaining secure databases and surveys. We anticipate that randomization will allow for equal distribution of demographic characteristics among the three groups. We will consider stratification by age, if necessary, in the analysis.

## Interventions

All patients will use the VR device and software from the Starlight Children's Foundation, the Starlight Xperience device (Google Daydream). This VR device is commercially available and is not FDA regulated. The Google Daydream is an all-in-one headset, so no additional hardware is required to deliver the VR experience. A set of headphones, included with the headset, is used to deliver audio instructions and sound, creating a fully immersive experience. Patients will be visited daily to undergo a single, 10-minute session with the VR headset.

### *VR-GR (intervention)*

Patients randomized to the VR-GR group will use the Aurora application to receive relaxation/mindfulness content. This application acts as an escape for patients as well as a tool to teach slow breathing and relaxation techniques. Patients are transported to an alpine meadow with dynamic daytime, and later, nighttime scenery. With the help of a 10-minute narrative, participants are guided to sync their breathing with their surroundings: the rise and fall of a floating butterfly during the day and the movement of the northern lights in the sky at night.

### *VR-D (active control):*

Patients randomized to the VR-D group will choose 1 of 3 distraction-based games: Space Pups, Pebbles the Penguin, or Wonderglade. Each provides a similar distraction-based experience for the user. 1) *Space Pups*: user controls an astronaut space puppy and works to collect treats to the beat of the music. 2) *Pebbles the Penguin*: user controls a penguin sliding down a mountain and works to collect shiny pebbles to unlock new power-ups. 3) *Wonderglade*: 5 different carnival-themed mini-games like basketball, miniature golf, and racing.

### *360 video (passive control):*

Patients will view a 360 video of a nature scene like the Aurora application but will not receive a guided tutorial on how to relax and sync their breathing with the application. They will also not receive any audio instructions or sound, decreasing the fully immersive experience.

## **Patient recruitment**

On average, 125 to 150 Nuss repairs are performed at CCHMC annually. We plan to enroll a total of 90 patients. Patients scheduled to undergo Nuss repair of pectus excavatum will be recruited continuously throughout the course of the study until enrollment targets are met. We anticipate recruiting two patients per week given our surgical volume. We will receive notification of all Nuss repair surgery bookings by the surgery schedulers to identify possible participants, allowing for eligible patients to be identified greater than 1 week prior to surgery. The operating room schedule as well as the surgical patient list will be screened for eligible patients based upon age criteria. Patients meeting age criteria will undergo screening of their available electronic medical record to assess study eligibility. Eligible patients will be approached on the day of surgery. If patients wish to participate, appropriate consent (and assent for patients  $\geq 11$  years of age) will be obtained and eligibility criteria will be verified. Patients

1  
2  
3 will be block randomized (1:1:1 ratio using REDCap) to VR-GR (intervention), VR-D (active  
4 control), and 360 video (passive control). Patients will receive a tutorial on the VR device at the  
5 time of enrollment. Demographic, health information, and medical history will be recorded and  
6 documented in the REDCap database. Patients will be offered a small stipend for participation to  
7 help increase recruitment and adherence.  
8  
9  
10  
11

### 12 **Study visits**

13 Patients will be visited daily to undergo a single, 10-minute session. Prior to the first session,  
14 patients will complete two validated questionnaires to assess baseline trait measures: the Pain  
15 Catastrophizing Scale for Children (PCS-C)<sup>34</sup> and the Child Anxiety Sensitivity Index (CASI).<sup>35</sup>  
16 They will also complete a health history questionnaire and a baseline pain intensity, pain  
17 unpleasantness, and anxiety rating will be obtained using the Numerical Rating Scale (NRS).<sup>36, 37</sup>  
18 Pain intensity, pain unpleasantness, and anxiety ratings will be repeated immediately, 15  
19 minutes, and 30 minutes following session completion. Patients typically remain in the hospital  
20 for 3 to 4 days following Nuss repair. During their inpatient stay, participants will have daily  
21 study visits, repeating the same process as the first session; patients will not repeat the PCS-C or  
22 CASI surveys. At the last visit, patients will be given a satisfaction survey to gather qualitative  
23 feedback about the VR experience.  
24  
25  
26  
27  
28  
29  
30  
31  
32  
33  
34

### 35 **Data collection**

36 For each eligible participant, data will be collected from patient history/interview and the  
37 electronic medical record in a standardized case report form in the REDCap system by a clinical  
38 research coordinator (CRC) or student who maintain CITI training in accordance with our local  
39 institutional review board (IRB) under the direct supervision of the principal investigator (PI).  
40 Total opioid and benzodiazepine usage will be collected from the electronic medical record for  
41 24 hours after each session. All medication consumption will be collected for assessment of non-  
42 opioid analgesics and to ensure consistency with the pectus pain management protocol. To assess  
43 pain intensity and unpleasantness after hospital discharge, patients will use a daily log to record  
44 pain scores using the NRS for one month. We will use eCAP (electronic capture pill dispenser,  
45 <https://www.informationmediary.com/nfc-smart-packaging-devices/ecap-smart-pill-bottle/>) to  
46 document medication consumption. Weekly reminders will be sent using Twilio, and telephone  
47 follow-up will be done at two weeks and one month to help improve patient adherence.  
48  
49  
50  
51  
52  
53  
54  
55  
56  
57  
58  
59  
60

1  
2  
3 Prescription cross-verification will be done using controlled substance reporting databases for  
4 Ohio, Kentucky, and Indiana (OARRS, KASPER, and INSPECT, respectively) to verify data  
5 collected from patient logs and eCAP.  
6  
7

### 8 9 **Measurements**

10  
11 a) Pain intensity, pain unpleasantness, and anxiety ratings will be assessed using the NRS.<sup>36, 37</sup> b)  
12 Pain catastrophizing will be assessed using PCS-C.<sup>34</sup> c) Anxiety sensitivity will be assessed  
13 using CASI.<sup>35</sup> d) Total opioid and benzodiazepine usage will be collected from EPIC for 24  
14 hours after each session and up to 1-month post-hospital discharge via eCAP. All medication  
15 consumption will be collected for assessment of non-opioid analgesics and converted to  
16 milligram per kilogram per day. Table 1 summarizes the measurements used in the study.  
17  
18  
19  
20  
21  
22

### 23 **Sample size calculation**

24 Sample size calculation is based on preliminary data assessing the impact of VR-D to affect  
25 changes in pain intensity in children and adolescents following surgery (unpublished).  
26 Preliminary data showed that the average change in pain intensity across time was -1, with  
27 standard deviation (SD) 1.2 and correlation between measurement pairs of 0.88. Assuming  
28 similar results in the passive control group, sample size of 30/group will have 80% power to  
29 detect differences in mean changes of one between VR-GR and the two control groups. We  
30 expect a difference of  $\geq 1$  between VR-GR and VR-D to emerge with multiple sessions as  
31 proposed with this study. Significance (alpha) is 0.025 to control for two comparisons. We will  
32 recruit 90 patients, 30 per group.  
33  
34  
35  
36  
37  
38  
39  
40

### 41 **Statistical analysis**

42 Statistical analysis will be done with SAS 9.4 (Cary, NC). Descriptive statistics will be  
43 calculated and summarized (*continuous*: mean  $\pm$  SD; *categorical*: frequency %). Prior to  
44 analysis, assumption of normality will be assessed for continuous variables and corrected using  
45 log transformation when appropriate. Bonferroni correction will be made as appropriate for  
46 comparisons. Change from baseline for primary and secondary outcomes will be tested for  
47 normality and deviation from zero using paired tests (t-test or signed-rank, as appropriate) at  
48 individual time points after interventions. Change from baseline will be compared between  
49 groups using two-sample t-test or Wilcoxon rank-sum test (between two groups, i.e., VR-GR vs.  
50  
51  
52  
53  
54  
55  
56  
57  
58  
59  
60

1  
2  
3 VR-D and VR-GR vs. 360 video) and ANOVA or Kruskal-Wallis test (across three groups) at  
4 individual time points after the sessions. Mixed effects models for repeated measures with  
5 baseline value, intervention group, time (0, 15, 30 minutes after intervention), and group and  
6 time interaction will be used to test the hypothesis that VR-GR reduces pain, anxiety, and opioid  
7 and benzodiazepine consumption more than controls. Pain and opioid use 1-month post-  
8 discharge will be compared between intervention groups using ANOVA (with adjustment of  
9 possible covariates) or Kruskal-Wallis test, as appropriate, based on data distribution.  
10  
11

12  
13  
14  
15  
16 Anxiety sensitivity (or pain catastrophizing) will be dichotomized using the sample median (or  
17 tertiles depending on distribution) and its effect on response to intervention (change in pain  
18 intensity from baseline) will be tested using the two-sample t-test or Wilcoxon rank-sum test, as  
19 appropriate at individual time points (0, 15, 30 minutes) after intervention. Mixed effects models  
20 for repeated measures (change in pain intensity from baseline) with high or low anxiety  
21 sensitivity (or pain catastrophizing) group, time (0, 15, 30 minutes after intervention), and group  
22 and time interaction will be used to test the hypothesis that patients with greater anxiety  
23 sensitivity and pain catastrophizing will have a larger reduction in pain vs. patients with less  
24 anxiety sensitivity and pain catastrophizing. Assuming the same SD and correlation between  
25 pain intensity measurement pairs from the primary power analysis, sample size of 15/group (high  
26 vs. low anxiety or pain catastrophizing dichotomized at median for the VR-GR group) will have  
27 80% power to detect differences in mean changes of pain intensity of 1.3 between the two  
28 groups, with  $\alpha=0.05$ . The same analysis will be repeated for pain unpleasantness and anxiety.  
29  
30  
31  
32  
33  
34  
35  
36  
37  
38  
39

40 We will make every effort to ensure that at least one daily VR session will be completed for each  
41 study participant and that all data extraction will be complete to avoid missing data. We will  
42 assess missing data for all study variables. Chart review for missing data on demographics,  
43 medical history, etc. will be performed when feasible. Missing outcome data will be statistically  
44 imputed using last observation carried forward (LOCF) or multiple imputation, and a sensitivity  
45 analysis will be conducted with different imputation methods as well as without imputation.  
46  
47  
48  
49  
50  
51  
52  
53  
54  
55  
56  
57  
58  
59  
60

## **ETHICS SAFETY AND DISSEMINATION**

### **Ethics**

This study is being conducted in accordance with the rules and regulations applicable to the conduct of ethical research and this study protocol has been approved by the IRB at CCHMC (IRB #2019-1090). This protocol includes clear delineation of the protocol version identifier and date on each protocol amendment submitted to the IRB; clear delineation of plans for data entry, coding, security, and storage; clear delineation of mechanisms to ensure patient confidentiality, including how personal information will be collected, shared, and maintained in order to protect confidentiality before, during, and after the trial; statements regarding who has access to data collected during this study; and a model consent form and other related documentation given to participants and/or guardians. We do not anticipate any major protocol modifications during the duration of this study.

### **Safety**

It is anticipated that the risk to participants in this study is minimal. The specific VR device used in this study is a minimal risk device, and because it is considered a relaxation device by the FDA, it is not regulated as a clinical device. Risks specific to VR are minimal, with the greatest risk being motion sickness and/or nausea while the headset is in place.<sup>38</sup> There is a theoretical risk of inducing seizures (0.025% in a pediatric data set supplied by a similar Samsung device). We will minimize these risks by excluding patients with a history of significant neurological disorders, including epilepsy and severe motion sickness/nausea. Patients will also be explicitly instructed to remove the headset should any side effects or discomfort occur. The PI will continually monitor all risks to the participants. Weekly lab meetings will be used to address quality assurance and safety concerns with the study. Research personnel are instructed to inform the PI immediately with any safety concerns or adverse events (AEs). The IRB will also be updated when any serious AEs (SAEs) occur or when mild or moderate AEs determined to be a result from study participation occur. SAEs that are unanticipated, serious, and possibly related to study participation will be reported to the data safety monitoring committee (DSMC), IRB, and any other necessary study regulatory committee. We do not anticipate any SAEs that would require stopping this trial early. Therefore, we do not plan to conduct interim analysis for safety. This consideration will change if SAEs are reported during the study.

1  
2  
3 Although the risk to patients from this clinical trial is low, a DSMC will be utilized to monitor  
4 safety. The DSMC will be composed of three experts (clinical research, pain management, and  
5 digital technology) who are independent of the protocol. The DSMC will report to the IRB. This  
6 protocol is approved by the IRB at CCHMC in compliance with existing regulations and policies  
7 for the conduct of clinical research.  
8  
9  
10  
11

### 12 13 **Dissemination**

14 Unique data will be obtained from this research and will be widely disseminated through  
15 conference presentations at national and international meetings and through publication of  
16 manuscripts in peer-reviewed publications. Participants may receive trial results if interested. All  
17 authors are eligible to participate in dissemination and we do not plan to use professional writers  
18 to disseminate study results.  
19  
20  
21  
22  
23

### 24 **Patient and public involvement**

25 No patients or members of the public were involved in the design, recruitment, or conduct of this  
26 study. Consideration of the burden of the intervention and time required to participate in this  
27 research was assessed during pilot data collection using VR in the acute postoperative pain  
28 population at our institution and information gathered from this pilot study helped guide the  
29 development of this clinical trial. Participants may receive information about study results if they  
30 wish via a letter describing results to participants. We will share access to the full protocol to  
31 requesting individuals/institutions.  
32  
33  
34  
35  
36  
37  
38

### 39 **CONCLUSION**

40 In summary, this is the first study to assess the efficacy of VR-GR compared to VR-D and a  
41 passive control. If this study yields beneficial results, we hope to design a multi-center,  
42 prospective, randomized clinical trial and incorporate VR-GR into multimodal analgesia in  
43 children and adolescents after surgery. Ultimately, this technology has the potential to impact  
44 care by providing remote delivery of this effective therapy and decreasing pain and opioid  
45 consumption in a variety of patient populations with pain.  
46  
47  
48  
49  
50  
51  
52  
53  
54  
55  
56  
57  
58  
59  
60



## **AUTHOR CONTRIBUTIONS**

VO, SW, and CK contributed to the conception of this idea, the design of the research protocol and study, and the writing of this manuscript. KO, CB, GM, SG, and KJ provided input regarding the design and implementation of the study protocol and procedures. LD and GY contributed to the design of the research protocol and the statistical analysis plan development. All authors revised and modified this manuscript. They will all approve the final version.

## **FUNDING**

This study is supported by an internal CCHMC research grant, Research Innovation/Pilot Funding Program as well as the Anesthesiology Department at CCHMC.

## **DATA STATEMENT**

Technical appendix, statistical code, and/or the study dataset will be available to the public following study completion.

## **COMPETING INTERESTS**

The authors have no competing interests to disclose.

## **ACKNOWLEDGEMENTS**

The authors have no acknowledgements to disclose.

## REFERENCES

1. Johnston LD, Miech RA, O'Malley PM, Bachman JF, Schulenberg JE, Patrick ME: Key Findings on Adolescent Drug Use. National Survey Results on Drug Use 1975-2017. <http://www.monitoringthefuture.org/pubs/monographs/mtf-overview2017.pdf>. Accessed February 14, 2020.
2. Johnston L.D. MRA, O'Malley P.M., et al. Key Findings on Adolescent Drug Use. *National Survey Results on Drug Use 1975-2017* 2017.
3. Kelly RE, Jr., Shamberger RC, Mellins RB, et al. Prospective multicenter study of surgical correction of pectus excavatum: design, perioperative complications, pain, and baseline pulmonary function facilitated by internet-based data collection. *J Am Coll Surg* 2007; 205: 205-216. 2007/07/31. DOI: 10.1016/j.jamcollsurg.2007.03.027.
4. Muhly WT, Beltran RJ, Bielsky A, et al. Perioperative Management and In-Hospital Outcomes After Minimally Invasive Repair of Pectus Excavatum: A Multicenter Registry Report From the Society for Pediatric Anesthesia Improvement Network. *Anesth Analg* 2019; 128: 315-327. 2018/10/23. DOI: 10.1213/ANE.0000000000003829.
5. Groenewald CB, Rabbitts JA, Schroeder DR, et al. Prevalence of moderate-severe pain in hospitalized children. *Paediatr Anaesth* 2012; 22: 661-668. 2012/02/16. DOI: 10.1111/j.1460-9592.2012.03807.x.
6. Kozlowski LJ, Kost-Byerly S, Colantuoni E, et al. Pain prevalence, intensity, assessment and management in a hospitalized pediatric population. *Pain Manag Nurs* 2014; 15: 22-35. 2014/03/08. DOI: 10.1016/j.pmn.2012.04.003.
7. Tick H, Nielsen A, Pelletier KR, et al. Evidence-Based Nonpharmacologic Strategies for Comprehensive Pain Care: The Consortium Pain Task Force White Paper. *Explore (NY)* 2018; 14: 177-211. 2018/05/08. DOI: 10.1016/j.explore.2018.02.001.
8. Harbaugh CM, Lee JS, Hu HM, et al. Persistent Opioid Use Among Pediatric Patients After Surgery. *Pediatrics* 2018; 141 2017/12/06. DOI: 10.1542/peds.2017-2439.
9. Chambers RA, Taylor JR and Potenza MN. Developmental neurocircuitry of motivation in adolescence: a critical period of addiction vulnerability. *Am J Psychiatry* 2003; 160: 1041-1052. 2003/06/05. DOI: 10.1176/appi.ajp.160.6.1041.
10. Fortier MA, Chou J, Maurer EL, et al. Acute to chronic postoperative pain in children: preliminary findings. *J Pediatr Surg* 2011; 46: 1700-1705. 2011/09/21. DOI: 10.1016/j.jpedsurg.2011.03.074.
11. Rabbitts JA, Zhou C, Groenewald CB, et al. Trajectories of postsurgical pain in children: risk factors and impact of late pain recovery on long-term health outcomes after major surgery. *Pain* 2015; 156: 2383-2389. 2015/09/19. DOI: 10.1097/j.pain.0000000000000281.
12. Shah A, Hayes CJ and Martin BC. Characteristics of Initial Prescription Episodes and Likelihood of Long-Term Opioid Use - United States, 2006-2015. *MMWR Morb Mortal Wkly Rep* 2017; 66: 265-269. 2017/03/17. DOI: 10.15585/mmwr.mm6610a1.
13. Gan TJ. Poorly controlled postoperative pain: prevalence, consequences, and prevention. *J Pain Res* 2017; 10: 2287-2298. 2017/10/14. DOI: 10.2147/JPR.S144066.
14. Peters ML, Sommer M, de Rijke JM, et al. Somatic and psychologic predictors of long-term unfavorable outcome after surgical intervention. *Ann Surg* 2007; 245: 487-494. 2007/04/17. DOI: 10.1097/01.sla.0000245495.79781.65.
15. Carrougher GJ, Hoffman HG, Nakamura D, et al. The effect of virtual reality on pain and range of motion in adults with burn injuries. *J Burn Care Res* 2009; 30: 785-791. 2009/08/21. DOI: 10.1097/BCR.0b013e3181b485d3.

16. Morris LD, Louw QA and Grimmer-Somers K. The effectiveness of virtual reality on reducing pain and anxiety in burn injury patients: a systematic review. *Clin J Pain* 2009; 25: 815-826. 2009/10/24. DOI: 10.1097/AJP.0b013e3181aaa909.
17. Malloy KM and Milling LS. The effectiveness of virtual reality distraction for pain reduction: a systematic review. *Clin Psychol Rev* 2010; 30: 1011-1018. 2010/08/10. DOI: 10.1016/j.cpr.2010.07.001.
18. Hoffman HG, Doctor JN, Patterson DR, et al. Virtual reality as an adjunctive pain control during burn wound care in adolescent patients. *Pain* 2000; 85: 305-309. 2000/02/29.
19. Li A, Montano Z, Chen VJ, et al. Virtual reality and pain management: current trends and future directions. *Pain Manag* 2011; 1: 147-157. 2011/07/23. DOI: 10.2217/pmt.10.15.
20. Garrett B, Taverner T, Masinde W, et al. A rapid evidence assessment of immersive virtual reality as an adjunct therapy in acute pain management in clinical practice. *Clin J Pain* 2014; 30: 1089-1098. 2014/02/19. DOI: 10.1097/AJP.0000000000000064.
21. Gold JI, Kim SH, Kant AJ, et al. Effectiveness of virtual reality for pediatric pain distraction during i.v. placement. *Cyberpsychol Behav* 2006; 9: 207-212. 2006/04/28. DOI: 10.1089/cpb.2006.9.207.
22. Furman E, Jasinevicius TR, Bissada NF, et al. Virtual reality distraction for pain control during periodontal scaling and root planing procedures. *J Am Dent Assoc* 2009; 140: 1508-1516. 2009/12/04.
23. Gold JI and Mahrer NE. Is Virtual Reality Ready for Prime Time in the Medical Space? A Randomized Control Trial of Pediatric Virtual Reality for Acute Procedural Pain Management. *J Pediatr Psychol* 2018; 43: 266-275. 2017/10/21. DOI: 10.1093/jpepsy/jsx129.
24. Indovina P, Barone D, Gallo L, et al. Virtual Reality as a Distraction Intervention to Relieve Pain and Distress During Medical Procedures: A Comprehensive Literature Review. *Clin J Pain* 2018; 34: 858-877. 2018/02/28. DOI: 10.1097/AJP.0000000000000599.
25. Cacau Lde A, Oliveira GU, Maynard LG, et al. The use of the virtual reality as intervention tool in the postoperative of cardiac surgery. *Rev Bras Cir Cardiovasc* 2013; 28: 281-289. 2013/08/14. DOI: 10.5935/1678-9741.20130039.
26. Mosso-Vazquez JL, Gao K, Wiederhold BK, et al. Virtual reality for pain management in cardiac surgery. *Cyberpsychol Behav Soc Netw* 2014; 17: 371-378. 2014/06/04. DOI: 10.1089/cyber.2014.0198.
27. Frey DP, Bauer ME, Bell CL, et al. Virtual Reality Analgesia in Labor: The VRAIL Pilot Study-A Preliminary Randomized Controlled Trial Suggesting Benefit of Immersive Virtual Reality Analgesia in Unmedicated Laboring Women. *Anesth Analg* 2019; 128: e93-e96. 2019/05/17. DOI: 10.1213/ANE.00000000000003649.
28. JahaniShoorab N, Ebrahimzadeh Zagami S, Nahvi A, et al. The Effect of Virtual Reality on Pain in Primiparity Women during Episiotomy Repair: A Randomize Clinical Trial. *Iran J Med Sci* 2015; 40: 219-224. 2015/05/23.
29. Van Ryckeghem DM, Van Damme S, Eccleston C, et al. The efficacy of attentional distraction and sensory monitoring in chronic pain patients: A meta-analysis. *Clin Psychol Rev* 2018; 59: 16-29. 2017/11/12. DOI: 10.1016/j.cpr.2017.10.008.
30. Gupta A, Scott K and Dukewich M. Innovative Technology Using Virtual Reality in the Treatment of Pain: Does It Reduce Pain via Distraction, or Is There More to It? *Pain Med* 2018; 19: 151-159. 2017/10/13. DOI: 10.1093/pm/pnx109.

- 1  
2  
3 31. Vagnoli L, Bettini A, Amore E, et al. Relaxation-guided imagery reduces perioperative  
4 anxiety and pain in children: a randomized study. *Eur J Pediatr* 2019; 178: 913-921. 2019/04/05.  
5 DOI: 10.1007/s00431-019-03376-x.  
6  
7 32. Peng P, Stinson JN, Choiniere M, et al. Dedicated multidisciplinary pain management  
8 centres for children in Canada: the current status. *Can J Anaesth* 2007; 54: 985-991. 2007/12/07.  
9 DOI: 10.1007/BF03016632.  
10  
11 33. Harris K and Reid D. The influence of virtual reality play on children's motivation. *Can J*  
12 *Occup Ther* 2005; 72: 21-29. 2005/02/25. DOI: 10.1177/000841740507200107.  
13  
14 34. Crombez G, Bijttebier P, Eccleston C, et al. The child version of the pain catastrophizing  
15 scale (PCS-C): a preliminary validation. *Pain* 2003; 104: 639-646. 2003/08/21.  
16  
17 35. Silverman WK, Goedhart AW, Barrett P, et al. The facets of anxiety sensitivity  
18 represented in the childhood anxiety sensitivity index: confirmatory analyses of factor models  
19 from past studies. *J Abnorm Psychol* 2003; 112: 364-374. 2003/08/29.  
20  
21 36. Tsze DS, von Baeyer CL, Pahalyants V, et al. Validity and Reliability of the Verbal  
22 Numerical Rating Scale for Children Aged 4 to 17 Years With Acute Pain. *Ann Emerg Med*  
23 2018; 71: 691-702 e693. 2017/11/07. DOI: 10.1016/j.annemergmed.2017.09.009.  
24  
25 37. Miro J, Castarlenas E and Huguet A. Evidence for the use of a numerical rating scale to  
26 assess the intensity of pediatric pain. *Eur J Pain* 2009; 13: 1089-1095. 2009/09/04. DOI:  
27 10.1016/j.ejpain.2009.07.002.  
28  
29  
30  
31  
32  
33  
34  
35  
36  
37  
38  
39  
40  
41  
42  
43  
44  
45  
46  
47  
48  
49  
50  
51  
52  
53  
54  
55  
56  
57  
58  
59  
60

1  
2  
3  
4  
5  
6  
7  
8  
9  
10  
11  
12  
13  
14  
15  
16  
17  
18  
19  
20  
21  
22  
23  
24  
25  
26  
27  
28  
29  
30  
31  
32  
33  
34  
35  
36  
37  
38  
39  
40  
41  
42  
43  
44  
45  
46  
47  
48  
49  
50  
51  
52  
53  
54  
55  
56  
57  
58  
59  
60

**Table 1. Scales and questionnaires used in the study**

**Figure 1. Study flow chart (CONSORT Diagram)**

**Figure 2. Experimental design of the study**

For peer review only

Table 1. Scales and questionnaires used in the study

| Table 1. Scales and questionnaires for the study                                                                                                                                                                                                                                                                                                                |
|-----------------------------------------------------------------------------------------------------------------------------------------------------------------------------------------------------------------------------------------------------------------------------------------------------------------------------------------------------------------|
| <b><u>Numerical Rating Scale (NRS)</u></b> . Numerical rating scale where children are asked to give a number on a scale of 0 to 10 of how bad their pain hurts, with 0 being no pain and 10 being the worst pain of their life.                                                                                                                                |
| <b><u>Pain Catastrophizing Scale for Children (PCS-C)</u></b> . Children rate 13 items assessing rumination, magnification, and helplessness related to thoughts about pain. PCS summary scores can be interpreted as low (0 to 14), moderate (15 to 25), and high ( $\geq 26$ ). Internal reliability for our VR-D pilot data was 0.94 (Cronbach's $\alpha$ ). |
| <b><u>Child Anxiety Sensitivity Index (CASI)</u></b> . 18-item self-report tool designed to measure symptoms of anxiety in children and adolescents, with total scores ranging from 18-54. Internal reliability for our VR-D pilot data was 0.84 (Cronbach's $\alpha$ ).                                                                                        |

Figure 1. Study flow chart (CONSORT Diagram)

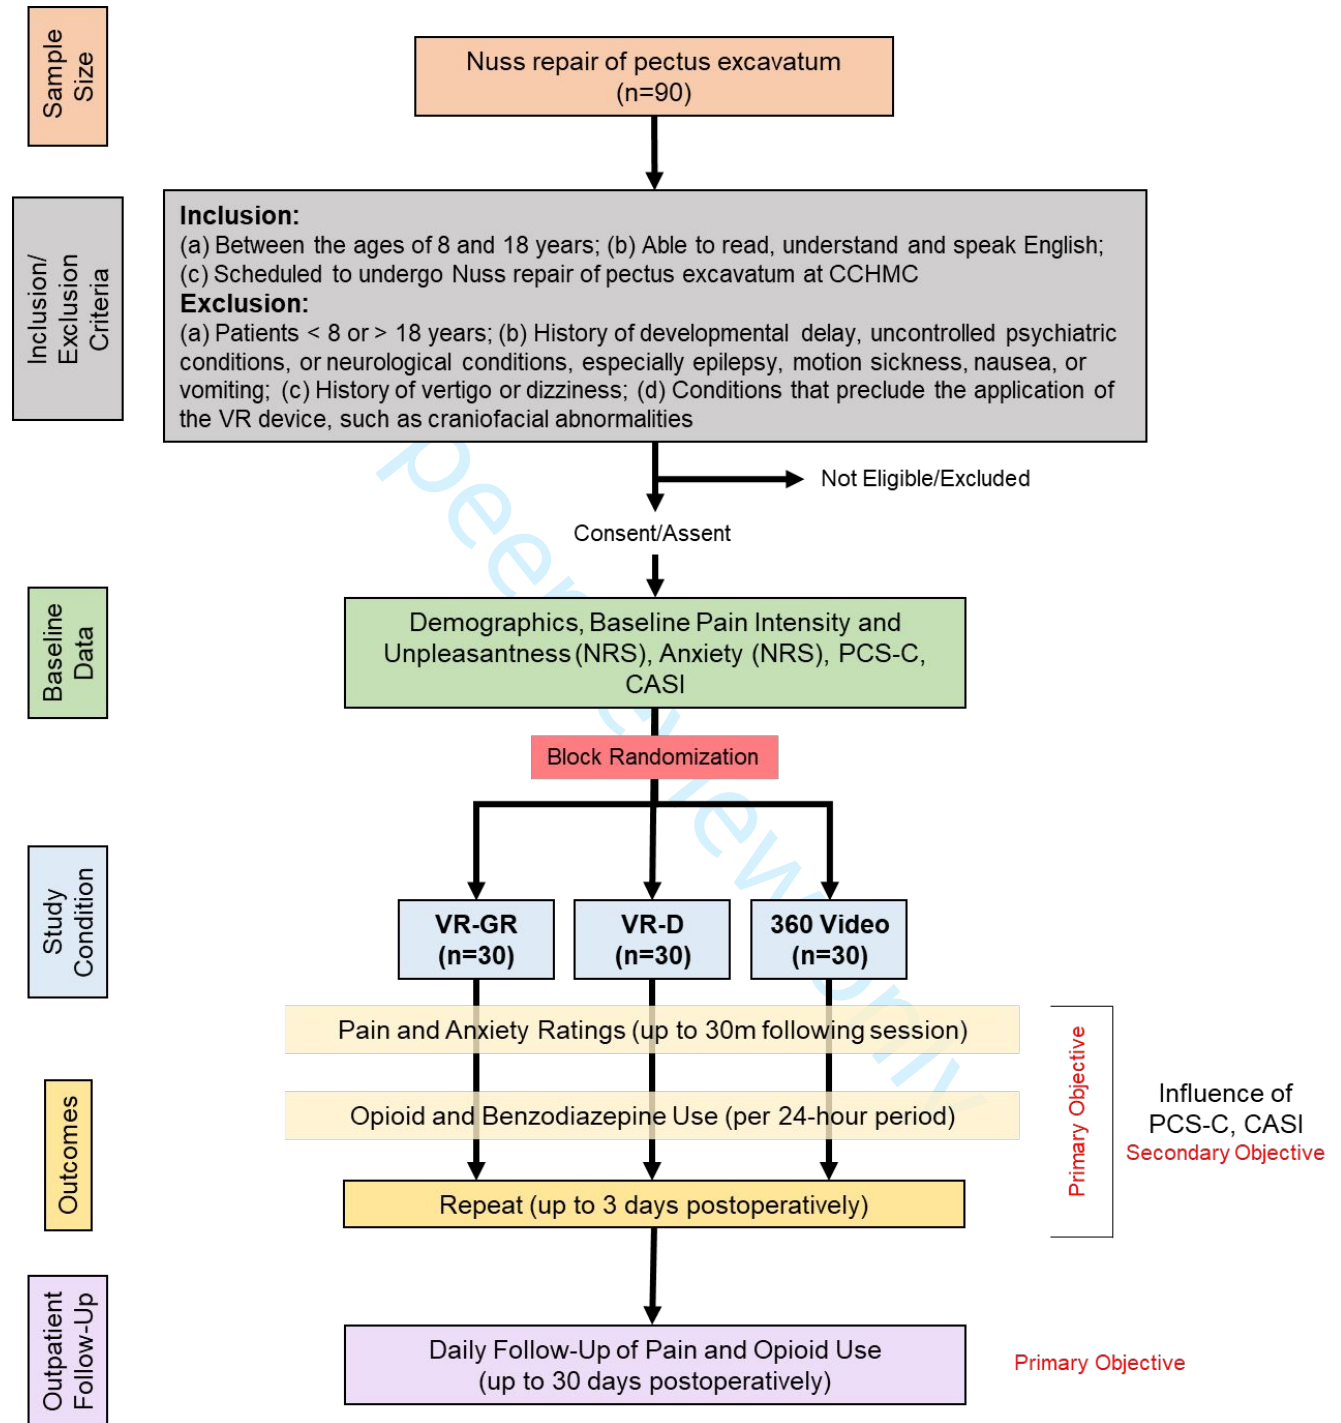

**Figure 2. Experimental design of the study**

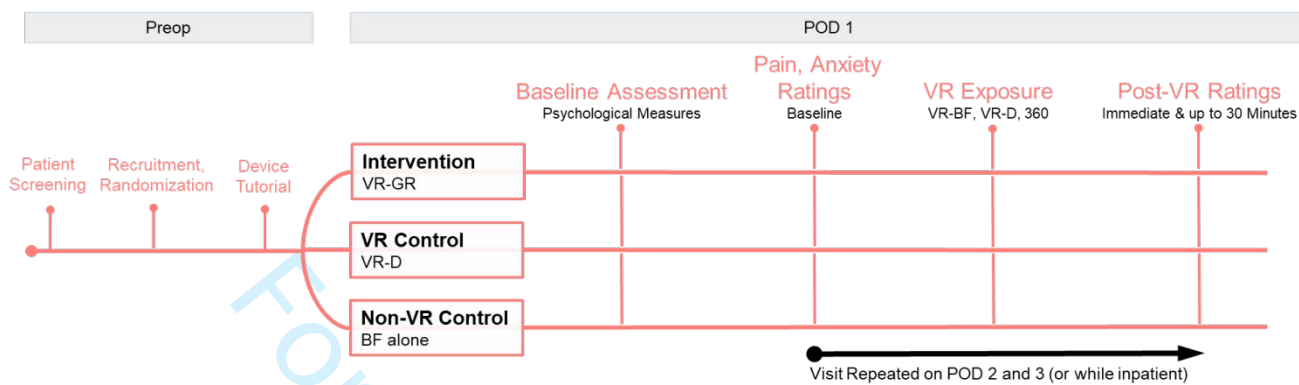



# Reporting checklist for protocol of a clinical trial.

Based on the SPIRIT guidelines.

## Instructions to authors

Complete this checklist by entering the page numbers from your manuscript where readers will find each of the items listed below.

Your article may not currently address all the items on the checklist. Please modify your text to include the missing information. If you are certain that an item does not apply, please write "n/a" and provide a short explanation.

Upload your completed checklist as an extra file when you submit to a journal.

In your methods section, say that you used the SPIRIT reporting guidelines, and cite them as:

Chan A-W, Tetzlaff JM, Altman DG, Laupacis A, Gøtzsche PC, Krleža-Jerić K, Hróbjartsson A, Mann H, Dickersin K, Berlin J, Doré C, Parulekar W, Summerskill W, Groves T, Schulz K, Sox H, Rockhold FW, Rennie D, Moher D. SPIRIT 2013 Statement: Defining standard protocol items for clinical trials. *Ann Intern Med.* 2013;158(3):200-207

|                                             |                     | Reporting Item                                                                                               | Page Number |
|---------------------------------------------|---------------------|--------------------------------------------------------------------------------------------------------------|-------------|
| <b>Administrative information</b>           |                     |                                                                                                              |             |
| Title                                       | <a href="#">#1</a>  | Descriptive title identifying the study design, population, interventions, and, if applicable, trial acronym | 1           |
| Trial registration                          | <a href="#">#2a</a> | Trial identifier and registry name. If not yet registered, name of intended registry                         | 2           |
| Trial registration: data set                | <a href="#">#2b</a> | All items from the World Health Organization Trial Registration Data Set                                     | 2, 6        |
| Protocol version                            | <a href="#">#3</a>  | Date and version identifier                                                                                  | 12          |
| Funding                                     | <a href="#">#4</a>  | Sources and types of financial, material, and other support                                                  | 13          |
| Roles and responsibilities: contributorship | <a href="#">#5a</a> | Names, affiliations, and roles of protocol contributors                                                      | 1, 13       |

|    |                           |                     |                                                                      |      |
|----|---------------------------|---------------------|----------------------------------------------------------------------|------|
| 1  | Roles and                 | <a href="#">#5b</a> | Name and contact information for the trial sponsor                   | n/a  |
| 2  | responsibilities:         |                     |                                                                      |      |
| 3  | sponsor contact           |                     |                                                                      |      |
| 4  | information               |                     |                                                                      |      |
| 5  |                           |                     |                                                                      |      |
| 6  |                           |                     |                                                                      |      |
| 7  |                           |                     |                                                                      |      |
| 8  | Roles and                 | <a href="#">#5c</a> | Role of study sponsor and funders, if any, in study design;          | 13   |
| 9  | responsibilities:         |                     | collection, management, analysis, and interpretation of data;        |      |
| 10 | sponsor and funder        |                     | writing of the report; and the decision to submit the report for     |      |
| 11 |                           |                     | publication, including whether they will have ultimate authority     |      |
| 12 |                           |                     | over any of these activities                                         |      |
| 13 |                           |                     |                                                                      |      |
| 14 |                           |                     |                                                                      |      |
| 15 |                           |                     |                                                                      |      |
| 16 | Roles and                 | <a href="#">#5d</a> | Composition, roles, and responsibilities of the coordinating centre, | n/a  |
| 17 | responsibilities:         |                     | steering committee, endpoint adjudication committee, data            |      |
| 18 | committees                |                     | management team, and other individuals or groups overseeing the      |      |
| 19 |                           |                     | trial, if applicable (see Item 21a for data monitoring committee)    |      |
| 20 |                           |                     |                                                                      |      |
| 21 |                           |                     |                                                                      |      |
| 22 |                           |                     |                                                                      |      |
| 23 | <b>Introduction</b>       |                     |                                                                      |      |
| 24 |                           |                     |                                                                      |      |
| 25 | Background and            | <a href="#">#6a</a> | Description of research question and justification for undertaking   | 4-5  |
| 26 | rationale                 |                     | the trial, including summary of relevant studies (published and      |      |
| 27 |                           |                     | unpublished) examining benefits and harms for each intervention      |      |
| 28 |                           |                     |                                                                      |      |
| 29 |                           |                     |                                                                      |      |
| 30 | Background and            | <a href="#">#6b</a> | Explanation for choice of comparators                                | 4-5  |
| 31 | rationale: choice of      |                     |                                                                      |      |
| 32 | comparators               |                     |                                                                      |      |
| 33 |                           |                     |                                                                      |      |
| 34 |                           |                     |                                                                      |      |
| 35 |                           |                     |                                                                      |      |
| 36 | Objectives                | <a href="#">#7</a>  | Specific objectives or hypotheses                                    | 5    |
| 37 |                           |                     |                                                                      |      |
| 38 | Trial design              | <a href="#">#8</a>  | Description of trial design including type of trial (eg, parallel    | 5, 6 |
| 39 |                           |                     | group, crossover, factorial, single group), allocation ratio, and    |      |
| 40 |                           |                     | framework (eg, superiority, equivalence, non-inferiority,            |      |
| 41 |                           |                     | exploratory)                                                         |      |
| 42 |                           |                     |                                                                      |      |
| 43 |                           |                     |                                                                      |      |
| 44 |                           |                     |                                                                      |      |
| 45 | <b>Methods:</b>           |                     |                                                                      |      |
| 46 | <b>Participants,</b>      |                     |                                                                      |      |
| 47 | <b>interventions, and</b> |                     |                                                                      |      |
| 48 | <b>outcomes</b>           |                     |                                                                      |      |
| 49 |                           |                     |                                                                      |      |
| 50 |                           |                     |                                                                      |      |
| 51 |                           |                     |                                                                      |      |
| 52 | Study setting             | <a href="#">#9</a>  | Description of study settings (eg, community clinic, academic        | 6    |
| 53 |                           |                     | hospital) and list of countries where data will be collected.        |      |
| 54 |                           |                     | Reference to where list of study sites can be obtained               |      |
| 55 |                           |                     |                                                                      |      |
| 56 |                           |                     |                                                                      |      |
| 57 | Eligibility criteria      | <a href="#">#10</a> | Inclusion and exclusion criteria for participants. If applicable,    | 7    |
| 58 |                           |                     | eligibility criteria for study centres and individuals who will      |      |
| 59 |                           |                     |                                                                      |      |
| 60 |                           |                     |                                                                      |      |

|    |                              |                                                                                            |          |
|----|------------------------------|--------------------------------------------------------------------------------------------|----------|
|    |                              | perform the interventions (eg, surgeons, psychotherapists)                                 |          |
| 1  |                              |                                                                                            |          |
| 2  | Interventions:               | <a href="#">#11a</a> Interventions for each group with sufficient detail to allow          | 7-8      |
| 3  | description                  | replication, including how and when they will be administered                              |          |
| 4  |                              |                                                                                            |          |
| 5  | Interventions:               | <a href="#">#11b</a> Criteria for discontinuing or modifying allocated interventions for a | 12       |
| 6  | modifications                | given trial participant (eg, drug dose change in response to harms,                        |          |
| 7  |                              | participant request, or improving / worsening disease)                                     |          |
| 8  |                              |                                                                                            |          |
| 9  | Interventions:               | <a href="#">#11c</a> Strategies to improve adherence to intervention protocols, and any    | 8-10     |
| 10 | adherence                    | procedures for monitoring adherence (eg, drug tablet return;                               |          |
| 11 |                              | laboratory tests)                                                                          |          |
| 12 | Interventions:               | <a href="#">#11d</a> Relevant concomitant care and interventions that are permitted or     | 6        |
| 13 | concomitant care             | prohibited during the trial                                                                |          |
| 14 |                              |                                                                                            |          |
| 15 | Outcomes                     | <a href="#">#12</a> Primary, secondary, and other outcomes, including the specific         | 6        |
| 16 |                              | measurement variable (eg, systolic blood pressure), analysis metric                        |          |
| 17 |                              | (eg, change from baseline, final value, time to event), method of                          |          |
| 18 |                              | aggregation (eg, median, proportion), and time point for each                              |          |
| 19 |                              | outcome. Explanation of the clinical relevance of chosen efficacy                          |          |
| 20 |                              | and harm outcomes is strongly recommended                                                  |          |
| 21 | Participant timeline         | <a href="#">#13</a> Time schedule of enrolment, interventions (including any run-ins       | Figure 2 |
| 22 |                              | and washouts), assessments, and visits for participants. A                                 |          |
| 23 |                              | schematic diagram is highly recommended (see Figure)                                       |          |
| 24 |                              |                                                                                            |          |
| 25 | Sample size                  | <a href="#">#14</a> Estimated number of participants needed to achieve study               | 10       |
| 26 |                              | objectives and how it was determined, including clinical and                               |          |
| 27 |                              | statistical assumptions supporting any sample size calculations                            |          |
| 28 |                              |                                                                                            |          |
| 29 | Recruitment                  | <a href="#">#15</a> Strategies for achieving adequate participant enrolment to reach       | 8-9      |
| 30 |                              | target sample size                                                                         |          |
| 31 |                              |                                                                                            |          |
| 32 |                              |                                                                                            |          |
| 33 |                              |                                                                                            |          |
| 34 |                              |                                                                                            |          |
| 35 |                              |                                                                                            |          |
| 36 |                              |                                                                                            |          |
| 37 |                              |                                                                                            |          |
| 38 |                              |                                                                                            |          |
| 39 |                              |                                                                                            |          |
| 40 |                              |                                                                                            |          |
| 41 |                              |                                                                                            |          |
| 42 |                              |                                                                                            |          |
| 43 |                              |                                                                                            |          |
| 44 |                              |                                                                                            |          |
| 45 | <b>Methods: Assignment</b>   |                                                                                            |          |
| 46 | <b>of interventions (for</b> |                                                                                            |          |
| 47 | <b>controlled trials)</b>    |                                                                                            |          |
| 48 |                              |                                                                                            |          |
| 49 |                              |                                                                                            |          |
| 50 | Allocation: sequence         | <a href="#">#16a</a> Method of generating the allocation sequence (eg, computer-           | 7, 9     |
| 51 | generation                   | generated random numbers), and list of any factors for                                     |          |
| 52 |                              | stratification. To reduce predictability of a random sequence,                             |          |
| 53 |                              | details of any planned restriction (eg, blocking) should be provided                       |          |
| 54 |                              | in a separate document that is unavailable to those who enrol                              |          |
| 55 |                              | participants or assign interventions                                                       |          |
| 56 |                              |                                                                                            |          |
| 57 |                              |                                                                                            |          |
| 58 |                              |                                                                                            |          |
| 59 |                              |                                                                                            |          |
| 60 |                              |                                                                                            |          |

|    |                        |                      |                                                                                                                                                                                                                                                                                                                                                                                                              |       |
|----|------------------------|----------------------|--------------------------------------------------------------------------------------------------------------------------------------------------------------------------------------------------------------------------------------------------------------------------------------------------------------------------------------------------------------------------------------------------------------|-------|
| 1  | Allocation concealment | <a href="#">#16b</a> | Mechanism of implementing the allocation sequence (eg, central telephone; sequentially numbered, opaque, sealed envelopes), describing any steps to conceal the sequence until interventions are assigned                                                                                                                                                                                                    | n/a   |
| 2  | mechanism              |                      |                                                                                                                                                                                                                                                                                                                                                                                                              |       |
| 3  |                        |                      |                                                                                                                                                                                                                                                                                                                                                                                                              |       |
| 4  |                        |                      |                                                                                                                                                                                                                                                                                                                                                                                                              |       |
| 5  |                        |                      |                                                                                                                                                                                                                                                                                                                                                                                                              |       |
| 6  |                        |                      |                                                                                                                                                                                                                                                                                                                                                                                                              |       |
| 7  |                        |                      |                                                                                                                                                                                                                                                                                                                                                                                                              |       |
| 8  | Allocation:            | <a href="#">#16c</a> | Who will generate the allocation sequence, who will enrol participants, and who will assign participants to interventions                                                                                                                                                                                                                                                                                    | 9     |
| 9  | implementation         |                      |                                                                                                                                                                                                                                                                                                                                                                                                              |       |
| 10 |                        |                      |                                                                                                                                                                                                                                                                                                                                                                                                              |       |
| 11 | Blinding (masking)     | <a href="#">#17a</a> | Who will be blinded after assignment to interventions (eg, trial participants, care providers, outcome assessors, data analysts), and how                                                                                                                                                                                                                                                                    | n/a   |
| 12 |                        |                      |                                                                                                                                                                                                                                                                                                                                                                                                              |       |
| 13 |                        |                      |                                                                                                                                                                                                                                                                                                                                                                                                              |       |
| 14 |                        |                      |                                                                                                                                                                                                                                                                                                                                                                                                              |       |
| 15 |                        |                      |                                                                                                                                                                                                                                                                                                                                                                                                              |       |
| 16 |                        |                      |                                                                                                                                                                                                                                                                                                                                                                                                              |       |
| 17 | Blinding (masking):    | <a href="#">#17b</a> | If blinded, circumstances under which unblinding is permissible, and procedure for revealing a participant's allocated intervention during the trial                                                                                                                                                                                                                                                         | n/a   |
| 18 | emergency unblinding   |                      |                                                                                                                                                                                                                                                                                                                                                                                                              |       |
| 19 |                        |                      |                                                                                                                                                                                                                                                                                                                                                                                                              |       |
| 20 |                        |                      |                                                                                                                                                                                                                                                                                                                                                                                                              |       |
| 21 |                        |                      |                                                                                                                                                                                                                                                                                                                                                                                                              |       |
| 22 | <b>Methods: Data</b>   |                      |                                                                                                                                                                                                                                                                                                                                                                                                              |       |
| 23 | <b>collection,</b>     |                      |                                                                                                                                                                                                                                                                                                                                                                                                              |       |
| 24 | <b>management, and</b> |                      |                                                                                                                                                                                                                                                                                                                                                                                                              |       |
| 25 | <b>analysis</b>        |                      |                                                                                                                                                                                                                                                                                                                                                                                                              |       |
| 26 |                        |                      |                                                                                                                                                                                                                                                                                                                                                                                                              |       |
| 27 |                        |                      |                                                                                                                                                                                                                                                                                                                                                                                                              |       |
| 28 |                        |                      |                                                                                                                                                                                                                                                                                                                                                                                                              |       |
| 29 | Data collection plan   | <a href="#">#18a</a> | Plans for assessment and collection of outcome, baseline, and other trial data, including any related processes to promote data quality (eg, duplicate measurements, training of assessors) and a description of study instruments (eg, questionnaires, laboratory tests) along with their reliability and validity, if known. Reference to where data collection forms can be found, if not in the protocol | 9-10  |
| 30 |                        |                      |                                                                                                                                                                                                                                                                                                                                                                                                              |       |
| 31 |                        |                      |                                                                                                                                                                                                                                                                                                                                                                                                              |       |
| 32 |                        |                      |                                                                                                                                                                                                                                                                                                                                                                                                              |       |
| 33 |                        |                      |                                                                                                                                                                                                                                                                                                                                                                                                              |       |
| 34 |                        |                      |                                                                                                                                                                                                                                                                                                                                                                                                              |       |
| 35 |                        |                      |                                                                                                                                                                                                                                                                                                                                                                                                              |       |
| 36 |                        |                      |                                                                                                                                                                                                                                                                                                                                                                                                              |       |
| 37 |                        |                      |                                                                                                                                                                                                                                                                                                                                                                                                              |       |
| 38 |                        |                      |                                                                                                                                                                                                                                                                                                                                                                                                              |       |
| 39 | Data collection plan:  | <a href="#">#18b</a> | Plans to promote participant retention and complete follow-up, including list of any outcome data to be collected for participants who discontinue or deviate from intervention protocols                                                                                                                                                                                                                    | 9     |
| 40 | retention              |                      |                                                                                                                                                                                                                                                                                                                                                                                                              |       |
| 41 |                        |                      |                                                                                                                                                                                                                                                                                                                                                                                                              |       |
| 42 |                        |                      |                                                                                                                                                                                                                                                                                                                                                                                                              |       |
| 43 |                        |                      |                                                                                                                                                                                                                                                                                                                                                                                                              |       |
| 44 | Data management        | <a href="#">#19</a>  | Plans for data entry, coding, security, and storage, including any related processes to promote data quality (eg, double data entry; range checks for data values). Reference to where details of data management procedures can be found, if not in the protocol                                                                                                                                            | 12    |
| 45 |                        |                      |                                                                                                                                                                                                                                                                                                                                                                                                              |       |
| 46 |                        |                      |                                                                                                                                                                                                                                                                                                                                                                                                              |       |
| 47 |                        |                      |                                                                                                                                                                                                                                                                                                                                                                                                              |       |
| 48 |                        |                      |                                                                                                                                                                                                                                                                                                                                                                                                              |       |
| 49 |                        |                      |                                                                                                                                                                                                                                                                                                                                                                                                              |       |
| 50 |                        |                      |                                                                                                                                                                                                                                                                                                                                                                                                              |       |
| 51 | Statistics: outcomes   | <a href="#">#20a</a> | Statistical methods for analysing primary and secondary outcomes. Reference to where other details of the statistical analysis plan can be found, if not in the protocol                                                                                                                                                                                                                                     | 10-11 |
| 52 |                        |                      |                                                                                                                                                                                                                                                                                                                                                                                                              |       |
| 53 |                        |                      |                                                                                                                                                                                                                                                                                                                                                                                                              |       |
| 54 |                        |                      |                                                                                                                                                                                                                                                                                                                                                                                                              |       |
| 55 |                        |                      |                                                                                                                                                                                                                                                                                                                                                                                                              |       |
| 56 | Statistics: additional | <a href="#">#20b</a> | Methods for any additional analyses (eg, subgroup and adjusted analyses)                                                                                                                                                                                                                                                                                                                                     | n/a   |
| 57 | analyses               |                      |                                                                                                                                                                                                                                                                                                                                                                                                              |       |
| 58 |                        |                      |                                                                                                                                                                                                                                                                                                                                                                                                              |       |
| 59 |                        |                      |                                                                                                                                                                                                                                                                                                                                                                                                              |       |
| 60 |                        |                      |                                                                                                                                                                                                                                                                                                                                                                                                              |       |

|    |                            |                      |                                                                         |       |
|----|----------------------------|----------------------|-------------------------------------------------------------------------|-------|
| 1  | Statistics: analysis       | <a href="#">#20c</a> | Definition of analysis population relating to protocol non-             | 11    |
| 2  | population and missing     |                      | adherence (eg, as randomised analysis), and any statistical methods     |       |
| 3  | data                       |                      | to handle missing data (eg, multiple imputation)                        |       |
| 4  |                            |                      |                                                                         |       |
| 5  |                            |                      |                                                                         |       |
| 6  | <b>Methods: Monitoring</b> |                      |                                                                         |       |
| 7  |                            |                      |                                                                         |       |
| 8  | Data monitoring:           | <a href="#">#21a</a> | Composition of data monitoring committee (DMC); summary of its          | 12    |
| 9  | formal committee           |                      | role and reporting structure; statement of whether it is independent    |       |
| 10 |                            |                      | from the sponsor and competing interests; and reference to where        |       |
| 11 |                            |                      | further details about its charter can be found, if not in the protocol. |       |
| 12 |                            |                      | Alternatively, an explanation of why a DMC is not needed                |       |
| 13 |                            |                      |                                                                         |       |
| 14 | Data monitoring:           | <a href="#">#21b</a> | Description of any interim analyses and stopping guidelines,            | 12-13 |
| 15 | interim analysis           |                      | including who will have access to these interim results and make        |       |
| 16 |                            |                      | the final decision to terminate the trial                               |       |
| 17 |                            |                      |                                                                         |       |
| 18 |                            |                      |                                                                         |       |
| 19 |                            |                      |                                                                         |       |
| 20 |                            |                      |                                                                         |       |
| 21 |                            |                      |                                                                         |       |
| 22 | Harms                      | <a href="#">#22</a>  | Plans for collecting, assessing, reporting, and managing solicited      | 12-13 |
| 23 |                            |                      | and spontaneously reported adverse events and other unintended          |       |
| 24 |                            |                      | effects of trial interventions or trial conduct                         |       |
| 25 |                            |                      |                                                                         |       |
| 26 |                            |                      |                                                                         |       |
| 27 | Auditing                   | <a href="#">#23</a>  | Frequency and procedures for auditing trial conduct, if any, and        | 12    |
| 28 |                            |                      | whether the process will be independent from investigators and the      |       |
| 29 |                            |                      | sponsor                                                                 |       |
| 30 |                            |                      |                                                                         |       |
| 31 |                            |                      |                                                                         |       |
| 32 |                            |                      |                                                                         |       |
| 33 | <b>Ethics and</b>          |                      |                                                                         |       |
| 34 | <b>dissemination</b>       |                      |                                                                         |       |
| 35 |                            |                      |                                                                         |       |
| 36 | Research ethics            | <a href="#">#24</a>  | Plans for seeking research ethics committee / institutional review      | 2, 12 |
| 37 | approval                   |                      | board (REC / IRB) approval                                              |       |
| 38 |                            |                      |                                                                         |       |
| 39 |                            |                      |                                                                         |       |
| 40 | Protocol amendments        | <a href="#">#25</a>  | Plans for communicating important protocol modifications (eg,           | 12    |
| 41 |                            |                      | changes to eligibility criteria, outcomes, analyses) to relevant        |       |
| 42 |                            |                      | parties (eg, investigators, REC / IRBs, trial participants, trial       |       |
| 43 |                            |                      | registries, journals, regulators)                                       |       |
| 44 |                            |                      |                                                                         |       |
| 45 |                            |                      |                                                                         |       |
| 46 |                            |                      |                                                                         |       |
| 47 | Consent or assent          | <a href="#">#26a</a> | Who will obtain informed consent or assent from potential trial         | 9     |
| 48 |                            |                      | participants or authorised surrogates, and how (see Item 32)            |       |
| 49 |                            |                      |                                                                         |       |
| 50 |                            |                      |                                                                         |       |
| 51 | Consent or assent:         | <a href="#">#26b</a> | Additional consent provisions for collection and use of participant     | n/a   |
| 52 | ancillary studies          |                      | data and biological specimens in ancillary studies, if applicable       |       |
| 53 |                            |                      |                                                                         |       |
| 54 |                            |                      |                                                                         |       |
| 55 | Confidentiality            | <a href="#">#27</a>  | How personal information about potential and enrolled participants      | 12    |
| 56 |                            |                      | will be collected, shared, and maintained in order to protect           |       |
| 57 |                            |                      | confidentiality before, during, and after the trial                     |       |
| 58 |                            |                      |                                                                         |       |
| 59 |                            |                      |                                                                         |       |
| 60 |                            |                      |                                                                         |       |

|    |                                             |                      |                                                                                                                                                                                                                                                                                     |     |
|----|---------------------------------------------|----------------------|-------------------------------------------------------------------------------------------------------------------------------------------------------------------------------------------------------------------------------------------------------------------------------------|-----|
| 1  | Declaration of interests                    | <a href="#">#28</a>  | Financial and other competing interests for principal investigators for the overall trial and each study site                                                                                                                                                                       | 14  |
| 2  |                                             |                      |                                                                                                                                                                                                                                                                                     |     |
| 3  |                                             |                      |                                                                                                                                                                                                                                                                                     |     |
| 4  |                                             |                      |                                                                                                                                                                                                                                                                                     |     |
| 5  | Data access                                 | <a href="#">#29</a>  | Statement of who will have access to the final trial dataset, and disclosure of contractual agreements that limit such access for investigators                                                                                                                                     | 12  |
| 6  |                                             |                      |                                                                                                                                                                                                                                                                                     |     |
| 7  |                                             |                      |                                                                                                                                                                                                                                                                                     |     |
| 8  |                                             |                      |                                                                                                                                                                                                                                                                                     |     |
| 9  |                                             |                      |                                                                                                                                                                                                                                                                                     |     |
| 10 | Ancillary and post trial care               | <a href="#">#30</a>  | Provisions, if any, for ancillary and post-trial care, and for compensation to those who suffer harm from trial participation                                                                                                                                                       | n/a |
| 11 |                                             |                      |                                                                                                                                                                                                                                                                                     |     |
| 12 |                                             |                      |                                                                                                                                                                                                                                                                                     |     |
| 13 |                                             |                      |                                                                                                                                                                                                                                                                                     |     |
| 14 | Dissemination policy: trial results         | <a href="#">#31a</a> | Plans for investigators and sponsor to communicate trial results to participants, healthcare professionals, the public, and other relevant groups (eg, via publication, reporting in results databases, or other data sharing arrangements), including any publication restrictions | 13  |
| 15 |                                             |                      |                                                                                                                                                                                                                                                                                     |     |
| 16 |                                             |                      |                                                                                                                                                                                                                                                                                     |     |
| 17 |                                             |                      |                                                                                                                                                                                                                                                                                     |     |
| 18 |                                             |                      |                                                                                                                                                                                                                                                                                     |     |
| 19 |                                             |                      |                                                                                                                                                                                                                                                                                     |     |
| 20 |                                             |                      |                                                                                                                                                                                                                                                                                     |     |
| 21 | Dissemination policy: authorship            | <a href="#">#31b</a> | Authorship eligibility guidelines and any intended use of professional writers                                                                                                                                                                                                      | 13  |
| 22 |                                             |                      |                                                                                                                                                                                                                                                                                     |     |
| 23 |                                             |                      |                                                                                                                                                                                                                                                                                     |     |
| 24 | Dissemination policy: reproducible research | <a href="#">#31c</a> | Plans, if any, for granting public access to the full protocol, participant-level dataset, and statistical code                                                                                                                                                                     | 13  |
| 25 |                                             |                      |                                                                                                                                                                                                                                                                                     |     |
| 26 |                                             |                      |                                                                                                                                                                                                                                                                                     |     |
| 27 |                                             |                      |                                                                                                                                                                                                                                                                                     |     |
| 28 | <b>Appendices</b>                           |                      |                                                                                                                                                                                                                                                                                     |     |
| 29 |                                             |                      |                                                                                                                                                                                                                                                                                     |     |
| 30 |                                             |                      |                                                                                                                                                                                                                                                                                     |     |
| 31 | Informed consent materials                  | <a href="#">#32</a>  | Model consent form and other related documentation given to participants and authorised surrogates                                                                                                                                                                                  | 12  |
| 32 |                                             |                      |                                                                                                                                                                                                                                                                                     |     |
| 33 |                                             |                      |                                                                                                                                                                                                                                                                                     |     |
| 34 |                                             |                      |                                                                                                                                                                                                                                                                                     |     |
| 35 | Biological specimens                        | <a href="#">#33</a>  | Plans for collection, laboratory evaluation, and storage of biological specimens for genetic or molecular analysis in the current trial and for future use in ancillary studies, if applicable                                                                                      | n/a |
| 36 |                                             |                      |                                                                                                                                                                                                                                                                                     |     |
| 37 |                                             |                      |                                                                                                                                                                                                                                                                                     |     |
| 38 |                                             |                      |                                                                                                                                                                                                                                                                                     |     |
| 39 |                                             |                      |                                                                                                                                                                                                                                                                                     |     |

40 The SPIRIT checklist is distributed under the terms of the Creative Commons Attribution License CC-BY-ND  
 41 3.0. This checklist was completed on 08. May 2020 using <https://www.goodreports.org/>, a tool made by the  
 42 [EQUATOR Network](#) in collaboration with [Penelope.ai](#)  
 43  
 44  
 45  
 46  
 47  
 48  
 49  
 50  
 51  
 52  
 53  
 54  
 55  
 56  
 57  
 58  
 59  
 60

# BMJ Open

**Guided relaxation-based virtual reality versus distraction-based virtual reality or passive control for postoperative pain management in children and adolescents undergoing Nuss repair of pectus excavatum: protocol for a prospective, randomized, controlled trial (FOREVR Peds trial)**

|                                 |                                                                                                                                                                                                                                                                                                                                                                                                                                                                                                                                                                                                                                                                                                                                                                                                                                                                                                                    |
|---------------------------------|--------------------------------------------------------------------------------------------------------------------------------------------------------------------------------------------------------------------------------------------------------------------------------------------------------------------------------------------------------------------------------------------------------------------------------------------------------------------------------------------------------------------------------------------------------------------------------------------------------------------------------------------------------------------------------------------------------------------------------------------------------------------------------------------------------------------------------------------------------------------------------------------------------------------|
| Journal:                        | <i>BMJ Open</i>                                                                                                                                                                                                                                                                                                                                                                                                                                                                                                                                                                                                                                                                                                                                                                                                                                                                                                    |
| Manuscript ID                   | bmjopen-2020-040295.R1                                                                                                                                                                                                                                                                                                                                                                                                                                                                                                                                                                                                                                                                                                                                                                                                                                                                                             |
| Article Type:                   | Protocol                                                                                                                                                                                                                                                                                                                                                                                                                                                                                                                                                                                                                                                                                                                                                                                                                                                                                                           |
| Date Submitted by the Author:   | 30-Sep-2020                                                                                                                                                                                                                                                                                                                                                                                                                                                                                                                                                                                                                                                                                                                                                                                                                                                                                                        |
| Complete List of Authors:       | Olbrecht, Vanessa A. ; Cincinnati Children's Hospital Medical Center, Anesthesia<br>Williams, Sara; Cincinnati Children's Hospital Medical Center, Behavioral Medicine and Clinical Psychology<br>O'Connor, Keith; Cincinnati Children's Hospital Medical Center, Anesthesia<br>Boehmer, Chloe; Cincinnati Children's Hospital Medical Center, Anesthesia<br>Marchant, Gilbert; Cincinnati Children's Hospital Medical Center, Anesthesiology<br>Glynn, Susan; Cincinnati Children's Hospital Medical Center, Anesthesia<br>Geisler, Kristie; Cincinnati Children's Hospital Medical Center, Anesthesia<br>Ding, Lili; Cincinnati Children's Hospital Medical Center, Biostatistics and Epidemiology<br>Yang, Gang; Cincinnati Children's Hospital Medical Center, Biostatistics and Epidemiology<br>King, Christopher; Cincinnati Children's Hospital Medical Center, Behavioral Medicine and Clinical Psychology |
| <b>Primary Subject Heading</b>: | Anaesthesia                                                                                                                                                                                                                                                                                                                                                                                                                                                                                                                                                                                                                                                                                                                                                                                                                                                                                                        |
| Secondary Subject Heading:      | Complementary medicine, Paediatrics                                                                                                                                                                                                                                                                                                                                                                                                                                                                                                                                                                                                                                                                                                                                                                                                                                                                                |
| Keywords:                       | Pain management < ANAESTHETICS, Paediatric anaesthesia < ANAESTHETICS, COMPLEMENTARY MEDICINE, Paediatric thoracic surgery < PAEDIATRIC SURGERY, Clinical trials < THERAPEUTICS                                                                                                                                                                                                                                                                                                                                                                                                                                                                                                                                                                                                                                                                                                                                    |
|                                 |                                                                                                                                                                                                                                                                                                                                                                                                                                                                                                                                                                                                                                                                                                                                                                                                                                                                                                                    |

SCHOLARONE™  
Manuscripts



I, the Submitting Author has the right to grant and does grant on behalf of all authors of the Work (as defined in the below author licence), an exclusive licence and/or a non-exclusive licence for contributions from authors who are: i) UK Crown employees; ii) where BMJ has agreed a CC-BY licence shall apply, and/or iii) in accordance with the terms applicable for US Federal Government officers or employees acting as part of their official duties; on a worldwide, perpetual, irrevocable, royalty-free basis to BMJ Publishing Group Ltd ("BMJ") its licensees and where the relevant Journal is co-owned by BMJ to the co-owners of the Journal, to publish the Work in this journal and any other BMJ products and to exploit all rights, as set out in our [licence](#).

The Submitting Author accepts and understands that any supply made under these terms is made by BMJ to the Submitting Author unless you are acting as an employee on behalf of your employer or a postgraduate student of an affiliated institution which is paying any applicable article publishing charge ("APC") for Open Access articles. Where the Submitting Author wishes to make the Work available on an Open Access basis (and intends to pay the relevant APC), the terms of reuse of such Open Access shall be governed by a Creative Commons licence – details of these licences and which [Creative Commons](#) licence will apply to this Work are set out in our licence referred to above.

Other than as permitted in any relevant BMJ Author's Self Archiving Policies, I confirm this Work has not been accepted for publication elsewhere, is not being considered for publication elsewhere and does not duplicate material already published. I confirm all authors consent to publication of this Work and authorise the granting of this licence.



1  
2  
3 **Guided relaxation-based virtual reality versus distraction-based virtual reality or passive**  
4 **control for postoperative pain management in children and adolescents undergoing Nuss**  
5 **repair of pectus excavatum: protocol for a prospective, randomized, controlled trial**  
6 **(FOREVR Peds trial)**  
7  
8

9  
10 Vanessa A. Olbrecht, MD, MBA,<sup>\*1,2,3,5</sup> Sara E. Williams, PhD,<sup>1,4,5</sup> Keith T. O'Connor, BS,<sup>2,3</sup>  
11 Chloe O. Boehmer,<sup>2</sup> Gilbert W. Marchant, BS,<sup>2,3</sup> Susan M. Glynn BA, CCRP,<sup>2</sup> Kristie J. Geisler,  
12 BS, CCRP,<sup>2</sup> Lili Ding, PhD,<sup>3,5,6</sup> Gang Yang, PhD,<sup>3,5,6</sup> Christopher D. King, PhD<sup>1,4,5</sup>  
13  
14  
15

16 **Affiliations:**

17  
18 <sup>1</sup>*Center for Understanding Pediatric Pain (CUPP), Cincinnati Children's, Cincinnati, Ohio,*  
19 *USA.*

20  
21 <sup>2</sup>*Department of Anesthesiology, Cincinnati Children's Hospital Medical Center, Cincinnati,*  
22 *Ohio, USA.*

23  
24 <sup>3</sup>*University of Cincinnati College of Medicine, Cincinnati, Ohio, USA.*

25  
26 <sup>4</sup>*Division of Behavioral Medicine and Clinical Psychology, Cincinnati Children's, Cincinnati,*  
*Ohio, USA.*

27  
28 <sup>5</sup>*Department of Pediatrics, University of Cincinnati, College of Medicine, Cincinnati, Ohio,*  
29 *USA.*

30  
31 <sup>6</sup>*Division of Biostatistics and Epidemiology, Cincinnati Children's Hospital Medical Center*  
32 *Cincinnati OH 45229, USA.*  
33  
34

35 **Corresponding Author:**

36  
37 Vanessa A. Olbrecht, MD, MBA  
38 Cincinnati Children's Hospital Medical Center  
39 Department of Anesthesiology  
40 3333 Burnet Avenue, MLC 2001  
41 Cincinnati, OH 45229, USA  
42 Telephone: (513) 213-1107  
43 Fax: (513) 636-7337  
44 Email: [Vanessa.Olbrecht@cchmc.org](mailto:Vanessa.Olbrecht@cchmc.org)  
45  
46  
47

48 **Key words:** Postoperative pain, virtual reality (VR), guided relaxation-based virtual reality (VR-  
49 GR), pediatric anesthesia, pediatric pain  
50  
51  
52

53 **Word Count:** 3,846 words (excluding title page, abstract, references, figures and tables)  
54  
55  
56  
57  
58  
59  
60

## ABSTRACT

**Introduction** Virtual reality (VR) offers an innovative method to deliver nonpharmacological pain management. Distraction-based VR (VR-D) using immersive games to redirect attention has shown short-term pain reductions in various settings. To create lasting pain reduction, VR-based strategies must go beyond distraction. Guided relaxation-based VR (VR-GR) integrates pain-relieving mind-body based guided relaxation with VR, a novel therapy delivery mechanism. The primary aim of this study is to assess the impact of daily VR-GR, VR-D, and 360 video (passive control) on pain intensity. We will also assess the impact of these interventions on pain unpleasantness, anxiety, and opioid and benzodiazepine consumption. The secondary aim of this study will assess the impact of psychological factors (anxiety sensitivity, pain catastrophizing) on pain following VR.

**Methods and analysis** This is a single center, prospective, randomized, clinical trial. Ninety children/adolescents, ages 8 to 18 years, presenting for Nuss repair of pectus excavatum will be randomized to 1 of 3 study arms (VR-GR, VR-D, 360 video). Patients will use the Starlight Xperience (Google Daydream) VR suite for 10-minutes. Patients randomized to VR-GR (n=30) will engage in guided relaxation/mindfulness with the Aurora application. Patients randomized to VR-D (n=30) will play 1 of 3 distraction-based games, and those randomized to the 360 video (n=30) will watch the Aurora application without audio instructions or sound. Primary outcome is pain intensity. Secondary outcomes include pain unpleasantness, anxiety, and opioid and benzodiazepine consumption.

**Ethics and dissemination** This study follows SPIRIT guidelines. The protocol was approved by the Cincinnati Children's Hospital Medical Center Institutional Review Board. Patient recruitment began in July 2020. Written informed consent will be obtained for all participants. All information acquired will be disseminated via scientific meetings and published in peer-reviewed journals.

**Trial registration number** ClinicalTrials.gov [NCT04351776](https://clinicaltrials.gov/ct2/show/study/NCT04351776), registered April 3, 2020.

## ARTICLE SUMMARY

### *Strengths and limitations of this study*

- This is a prospective, randomized clinical trial, which provides the best clinical evidence and support for VR as an intervention.
- This is the first study examining the use of VR-based interventions in a postoperative pediatric population.
- Due to the nature of the study, it cannot be blinded.
- One limitation is the specific patient population being studied: children and adolescents between the ages of 8 and 18 years undergoing Nuss repair of pectus excavatum. Patient selection may limit generalizability of findings.
- A second limitation is the conduction of the study at an academic, tertiary care, pediatric hospital; as such, these results may not be generalizable to patients in other clinical settings.

## INTRODUCTION

### Background and rationale

Children and adolescents with pain are at risk of opioid abuse,<sup>1</sup> and many are initially exposed to narcotics prescribed to treat pain.<sup>2</sup> More specifically, children and adolescents are at risk of persistent pain and opioid use after surgery, with the surgical period being a significant risk for the initial opioid exposure in children.<sup>3-5</sup> Over 25% of patients with chronic pain who are on opioids were first exposed after surgery.<sup>6</sup> Even short-term opioid use after surgery places a patient at risk of long-term abuse. Just 5 days of opioid use can increase the risk of persistent use, and use for more than 8 days may increase the risk to as much as 13.5%.<sup>7</sup> While this risk is well documented in adults, few studies address this topic in children.<sup>8</sup> A recent retrospective study of opioid-naïve surgical patients found persistent opioid use in 4.8% of adolescents versus 0.1% in a matched, nonsurgical cohort, equating to a 50-fold increase in risk.<sup>3</sup>

Pectus excavatum, a depression of the anterior chest wall, is often corrected via the Nuss repair, a minimally invasive procedure in which a bar(s) is inserted beneath the sternum and flipped to elevate the chest.<sup>9</sup> Although minimally invasive, this procedure is associated with significant postoperative pain.<sup>10</sup> Despite efforts at multimodal therapy, the percentage of patients experiencing severe pain after surgery has not changed over the last 20 years.<sup>11, 12</sup> Existing pediatric studies have identified an approximately 20% incidence of persistent postsurgical pain beyond what is expected from surgery alone.<sup>13</sup> While 80% of these patients recover within about one month, 20% maintain a reduced quality of life secondary to persistent pain.<sup>13</sup> While the consequences of opioids exposure are significant, poorly controlled postsurgical pain is also problematic. Ineffective postoperative pain management is associated with increased morbidity, poorer physical functioning, longer recover, and higher cost.<sup>14, 15</sup> Multimodal pain management requires the exploration of safe, effective, nonpharmacological strategies that reduce pain and opioid consumption.<sup>16</sup> Nonpharmacological methods to treat pain can both improve analgesia after surgery and decrease opioid exposure, a risk factor for future addiction.<sup>1</sup>

Virtual reality (VR) may offer a safe, innovative, nonpharmacological tool with the potential to decrease pain and medication consumption. VR provides an immersive, multisensory, three-dimensional (3D) environment that enables individuals to have modified experiences of reality

1  
2  
3 by creating a sense of “presence,” making it an excellent candidate for distraction-based  
4 therapy.<sup>17</sup> Distraction-based virtual reality (VR-D) is hypothesized to reduce pain through the  
5 redirection of attention augmented by the immersion created by VR.<sup>18, 19</sup> VR-D has been used  
6 during painful procedures, the postoperative period, and labor to help decrease pain by  
7 redirecting attention.<sup>20-32</sup> These studies show transient reductions in pain insufficient to treat  
8 prolonged acute pain experiences,<sup>33, 34</sup> including postoperative pain, suggesting that redirection  
9 of attention alone is not adequate to help manage pain that is more sustained. Comparatively,  
10 nonpharmacological alternatives that utilize mind-body based therapies delivered in a traditional  
11 format, like relaxation and slow breathing, are able to decrease anxiety and pain in children  
12 undergoing surgery.<sup>35</sup> Unlike distraction, slow breathing during relaxation results in increased  
13 heartrate variability,<sup>36</sup> which activates the parasympathetic nervous system, resulting in pain  
14 reduction.<sup>37, 38</sup> However, despite their efficacy, these therapies are fraught with challenges, such  
15 as barriers to accessing care, high cost, need for multiple visits, and provider shortages.<sup>39</sup> VR can  
16 increase accessibility to these mind-body therapies and enhance acceptability, motivation, and  
17 adherence in pediatric patients compared to methods without VR.<sup>40</sup> Combining strategies of  
18 traditional mind-body therapies, like relaxation and slow breathing, with the immersive nature of  
19 VR opens new possibilities for multimodal analgesia in the pediatric population and has the  
20 potential to simultaneously minimize acute postoperative pain and opioid consumption. Guided  
21 relaxation-based VR (VR-GR) is a promising mechanism to deliver mind-body based therapy,  
22 improve postoperative pain control, and avoid challenges common with mind-body therapies  
23 delivered in the traditional format.

24  
25  
26  
27  
28  
29  
30  
31  
32  
33  
34  
35  
36  
37  
38  
39  
40  
41 We have designed a prospective, randomized, clinical trial to assess the efficacy of VR-GR to  
42 decrease pain, anxiety, and opioid consumption in children and adolescents undergoing Nuss  
43 repair of pectus excavatum and hypothesize that VR-GR will be more effective at reducing pain,  
44 anxiety, and opioid consumption in this population than VR-D or a passive control.

### 45 46 47 48 49 **Objectives**

50  
51 The primary objective of this study is to determine the impact of VR-GR on pain intensity in  
52 children and adolescents undergoing Nuss repair of pectus excavatum compared to VR-D and  
53 360 video both during the hospitalization (primary) and up to one month following discharge  
54 (secondary). We will also assess the impact of VR-GR on pain unpleasantness, anxiety, and  
55  
56  
57  
58  
59  
60

1  
2  
3 opioid and benzodiazepine consumption compared to VR-D and 360 video. The secondary  
4 objective of this study is to determine the role of anxiety sensitivity and pain catastrophizing on  
5 changes in pain and anxiety following VR-GR, VR-D, and 360 video both during hospitalization  
6 and 1-month post discharge in this same patient population using standard questionnaires.  
7  
8  
9

## 10 11 12 **METHODS AND ANALYSIS**

13 The FOREVR Peds study is a single center, prospective, unblinded, randomized clinical trial  
14 with three groups: VR-GR, VR-D or 360 video. A daily, 10-minute session of these respective  
15 interventions will be administered to children and adolescents between the age of 8 and 18 years  
16 undergoing Nuss repair of pectus excavatum for up to 3 days after surgery. The primary  
17 objective is to determine the impact of VR-GR on pain intensity compared to VR-D and 360  
18 video during hospitalization. Patient recruitment has not yet begun, and we anticipate a total  
19 study duration of two years. Patient recruitment began in July 2020. This study protocol  
20 complies with the SPIRIT Statement as well as the CONSORT Statement (Figure 1). The study  
21 was registered at ClinicalTrials.gov (NCT04351776) on April 3, 2020 and all trial registration  
22 data can be found on the [ClinicalTrials.gov](https://www.clinicaltrials.gov) website.  
23  
24  
25  
26  
27  
28  
29  
30

### 31 32 **Study setting**

33 Cincinnati Children's Hospital Medical Center (CCHMC), a tertiary care, academic, pediatric  
34 hospital.  
35  
36  
37

### 38 39 **Study design**

40 This is a single-center, prospective, randomized clinical trial of children and adolescents with  
41 acute postoperative pain following Nuss repair of pectus excavatum to assess the impact of  
42 multiple VR-GR sessions on pain and medication utilization in relation to patient anxiety and  
43 pain catastrophizing. Figure 1 summarizes the study design. We will assess the acute and long-  
44 term impact of each intervention on changes in pain intensity, pain unpleasantness, anxiety, and  
45 opioid and benzodiazepine consumption during hospitalization and following discharge, where  
46 acute impact on pain intensity is the primary focus. Figure 2 summarizes this experimental  
47 design. All patients are managed postoperatively via the pectus surgery pain management  
48 protocol, which standardizes all non-controlled medications received by patients. Patients  
49  
50  
51  
52  
53  
54  
55  
56  
57  
58  
59  
60

1  
2  
3 enrolled in this study will be managed per this protocol (standard care) and will receive the  
4 additional intervention of VR or 360 video.  
5  
6

## 7 **Outcome measures**

### 8 *Primary outcome:*

9  
10 Our primary outcome is pain intensity following daily VR-GR, VR-D, and 360 video in our  
11 population during hospitalization.  
12  
13

### 14 *Secondary outcomes:*

15  
16 Our secondary outcomes are pain unpleasantness, anxiety, and opioid and benzodiazepine  
17 consumption following daily VR-GR, VR-D, and 360 video during hospitalization in our  
18 population during hospitalization and up to 1-month following discharge. We will also assess the  
19 impact of pain catastrophizing and anxiety sensitivity on these outcomes.  
20  
21  
22  
23

## 24 **Participants**

25  
26 We will recruit 90 adolescents (30 per group) between the age of 8 and 18 years undergoing  
27 Nuss repair of pectus excavatum. Eligibility criteria have been chosen to correspond with our  
28 prior work and result in a population with whom our group has substantial experience.  
29  
30  
31

### 32 *Inclusion Criteria:*

33  
34 Patients will be included based on the following criteria: (a) Between the ages of 8 and 18 years;  
35 (b) Able to read, understand, and speak English; (c) Scheduled to undergo Nuss repair of pectus  
36 excavatum at CCHMC.  
37  
38

### 39 *Exclusion criteria:*

40  
41 Patients will be excluded for the following reasons: (a) Patients < 8 or > 18 years of age at the  
42 time study enrollment; (b) History of significant developmental delay, underlying psychiatric  
43 disease associated with delusions or hallucinations, or significant neurological conditions,  
44 including epilepsy, severe motion sickness, or active nausea/vomiting; (c) Conditions that  
45 preclude application and use of the VR device, including craniofacial abnormalities.  
46  
47  
48  
49

## 50 **Randomization**

51  
52 Eligible patients will be randomly assigned in a 1:1:1 fashion to the following three study  
53 groups: VR-GR, VR-D, and 360 video (passive control) following study enrollment. Block  
54 randomization will be done using an online randomizing tool ([www.randomizer.org](http://www.randomizer.org)) to assign  
55  
56  
57  
58

1  
2  
3 patient study numbers into the 1 of 3 groups. The randomization scheme will be stored in our  
4 REDCap database (<https://www.project-redcap.org/>), a secure web application for building and  
5 maintaining secure databases and surveys. We anticipate that randomization will allow for equal  
6 distribution of demographic characteristics among the three groups.  
7  
8  
9

## 10 11 **Interventions**

12 All patients will use the VR device and software from the Starlight Children's Foundation, the  
13 Starlight Xperience device (Google Daydream). This VR device is commercially available and is  
14 not FDA regulated. The Google Daydream is an all-in-one headset, so no additional hardware is  
15 required to deliver the VR experience. A set of headphones, included with the headset, is used to  
16 deliver audio instructions and sound, creating a fully immersive experience. Patients will be  
17 visited daily to undergo a single, 10-minute session with the VR headset for up to 3 days after  
18 surgery. We will work with the care team to standardize the timing of the daily study visit for all  
19 patients.  
20  
21  
22  
23  
24  
25  
26  
27  
28

### 29 *VR-GR (intervention)*

30 Patients randomized to the VR-GR group will use the Aurora application to receive  
31 relaxation/mindfulness content. This application acts as an escape for patients as well as a tool to  
32 teach slow breathing and relaxation techniques. Patients are transported to an alpine meadow  
33 with dynamic daytime, and later, nighttime scenery. With the help of a 10-minute narrative,  
34 participants are guided to sync their breathing with their surroundings: the rise and fall of a  
35 floating butterfly during the day and the movement of the northern lights in the sky at night.  
36  
37  
38  
39  
40  
41

### 42 *VR-D (active control):*

43 Patients randomized to the VR-D group will choose 1 of 3 distraction-based games: Space Pups,  
44 Pebbles the Penguin, or Wonderglade. Each provides a similar distraction-based experience for  
45 the user. 1) *Space Pups*: user controls an astronaut space puppy and works to collect treats to the  
46 beat of the music. 2) *Pebbles the Penguin*: user controls a penguin sliding down a mountain and  
47 works to collect shiny pebbles to unlock new power-ups. 3) *Wonderglade*: 5 different carnival-  
48 themed mini-games like basketball, miniature golf, and racing.  
49  
50  
51  
52  
53  
54  
55  
56  
57  
58  
59  
60



1  
2  
3 *360 video (passive control):*  
4

5 Patients will view a 360 video of a nature scene like the Aurora application but will not receive a  
6 guided tutorial on how to relax and sync their breathing with the application. They will also not  
7 receive any audio instructions or sound, decreasing the fully immersive experience.  
8  
9

## 10 11 **Patient recruitment**

12 On average, 125 to 150 Nuss repairs are performed at CCHMC annually. We plan to enroll a  
13 total of 90 patients. Patients scheduled to undergo Nuss repair of pectus excavatum will be  
14 recruited continuously throughout the course of the study until enrollment targets are met. We  
15 anticipate recruiting two patients per week given our surgical volume. We will receive  
16 notification of all Nuss repair surgery bookings by the surgery schedulers to identify possible  
17 participants, allowing for eligible patients to be identified greater than 1 week prior to surgery.  
18 The operating room schedule as well as the surgical patient list will be screened for eligible  
19 patients based upon age criteria. Patients meeting age criteria will undergo screening of their  
20 available electronic medical record to assess study eligibility. Eligible patients will be  
21 approached prior to surgery. If patients wish to participate, appropriate consent (and assent for  
22 patients  $\geq 11$  years of age) will be obtained and eligibility criteria will be verified. Patients will  
23 be block randomized (1:1:1 ratio) to VR-GR (intervention), VR-D (active control), and 360  
24 video (passive control). A randomization scheme will be created prior to the start of the study  
25 using an online tool ([www.randomizer.org](http://www.randomizer.org)) and patients will be assigned to a group based upon  
26 study number. Patients will receive a tutorial on the VR device at the time of enrollment.  
27 Demographic, health information, and medical history will be recorded and documented in the  
28 REDCap database. Patients will be offered a small stipend for participation to help increase  
29 recruitment and adherence.  
30  
31  
32  
33  
34  
35  
36  
37  
38  
39  
40  
41  
42  
43  
44

## 45 **Study visits**

46 Patients will be visited daily to undergo a single, 10-minute session. Prior to surgery, patients  
47 will complete two validated questionnaires to assess baseline trait measures: the Pain  
48 Catastrophizing Scale for Children (PCS-C)<sup>41</sup> and the Child Anxiety Sensitivity Index (CASI).<sup>42</sup>  
49 They will also complete a health history questionnaire and a baseline pain intensity, pain  
50 unpleasantness, and anxiety rating will be obtained using the Numerical Rating Scale (NRS).<sup>43, 44</sup>  
51 Pain intensity, pain unpleasantness, and anxiety ratings will be repeated immediately, 15  
52  
53  
54  
55  
56  
57  
58  
59  
60

1  
2  
3 minutes, and 30 minutes following session completion. Patients typically remain in the hospital  
4 for 3 to 4 days following Nuss repair. During their inpatient stay, participants will have daily  
5 study visits, repeating the same process as the first session; patients will not repeat the PCS-C or  
6 CASI surveys. At the last visit, patients will be given a satisfaction survey to gather qualitative  
7 feedback about the VR experience.  
8  
9  
10  
11  
12

### 13 **Data collection**

14 For each eligible participant, data will be collected from patient history/interview and the  
15 electronic medical record in a standardized case report form in the REDCap system by a clinical  
16 research coordinator (CRC) or student who maintain CITI training in accordance with our local  
17 institutional review board (IRB) under the direct supervision of the principal investigator (PI).  
18 Total opioid and benzodiazepine usage will be collected from the electronic medical record for  
19 24 hours after each session. All medication consumption will be collected for assessment of non-  
20 opioid analgesics and to ensure consistency with the pectus pain management protocol. To assess  
21 pain intensity and unpleasantness after hospital discharge, patients will use a daily log to record  
22 pain scores using the NRS for one month. We will use eCAP (electronic capture pill dispenser,  
23 <https://www.informationmediary.com/nfc-smart-packaging-devices/ecap-smart-pill-bottle/>) to  
24 document medication consumption. Weekly reminders will be sent using Twilio, and telephone  
25 follow-up will be done at two weeks and one month to help improve patient adherence.  
26 Prescription cross-verification will be done using controlled substance reporting databases for  
27 Ohio, Kentucky, and Indiana (OARRS, KASPER, and INSPECT, respectively) to verify data  
28 collected from patient logs and eCAP.  
29  
30  
31  
32  
33  
34  
35  
36  
37  
38  
39  
40  
41

### 42 **Measurements**

43 a) Pain intensity, pain unpleasantness, and anxiety ratings will be assessed using the NRS.<sup>43, 44</sup> b)  
44 Pain catastrophizing will be assessed using PCS-C.<sup>41</sup> c) Anxiety sensitivity will be assessed  
45 using CASI.<sup>42</sup> d) Total opioid and benzodiazepine usage will be collected from EPIC for 24  
46 hours after each session and up to 1-month post-hospital discharge via eCAP. All medication  
47 consumption will be collected for assessment of non-opioid analgesics and converted to  
48 milligram per kilogram per day. Table 1 summarizes the measurements used in the study.  
49  
50  
51  
52  
53  
54  
55  
56  
57  
58  
59  
60

### Sample size calculation

Sample size calculation is based on preliminary data assessing the impact of VR-D to affect changes in pain intensity in children and adolescents following surgery (unpublished).

Preliminary data showed that the average change in pain intensity across time was -1, with standard deviation (SD) 1.2 and correlation between measurement pairs of 0.88. Assuming similar results in the passive control group, sample size of 30/group will have 80% power to detect differences in mean changes of one between VR-GR and the two control groups. We expect a difference of  $\geq 1$  between VR-GR and VR-D to emerge with multiple sessions as proposed with this study. Significance (alpha) is 0.025 to control for two comparisons. We will recruit 90 patients, 30 per group.

### Statistical analysis

Statistical analysis will be done with SAS 9.4 (Cary, NC). Descriptive statistics will be calculated and summarized (*continuous*: mean  $\pm$  SD; *categorical*: frequency %). Prior to analysis, assumption of normality will be assessed for continuous variables and corrected using log transformation when appropriate. All statistical tests will be two-sided. Bonferroni correction will be made as appropriate for comparisons. Change from baseline for primary and secondary outcomes will be tested for normality and deviation from zero using paired tests (t-test or signed-rank, as appropriate) at individual time points after interventions. Change from baseline will be compared between groups using two-sample t-test or Wilcoxon rank-sum test (between two groups, i.e., VR-GR vs. VR-D and VR-GR vs. 360 video) and ANOVA or Kruskal-Wallis test (across three groups) at individual time points after the sessions.

Primary analysis for the primary outcome, pain intensity during hospitalization, will be conducted on the intent to treat population, which is defined as all patients who were randomized and received any intervention. Subjects will be analyzed according to their randomized intervention assignment regardless of the intervention actually received. The primary analysis will be mixed effects models for repeated measures with baseline value, intervention group, time (0, 15, 30 minutes after intervention), and group and time interaction to test the hypothesis that VR-GR reduces pain more than controls. Similar analysis will be run for secondary outcomes including anxiety, and opioid and benzodiazepine consumption. Potential covariates (such as age

1  
2  
3 and sex) will be tested for association with the outcomes using univariate approaches and  
4 included in the mixed effect models if significant. Pain and opioid use 1-month post-discharge  
5 will be compared between intervention groups using ANOVA (with adjustment of possible  
6 covariates) or Kruskal-Wallis test, as appropriate, based on data distribution.  
7  
8  
9

10  
11 Anxiety sensitivity (or pain catastrophizing) will be dichotomized using the sample median (or  
12 tertiles depending on distribution) and its effect on response to intervention (change in pain  
13 intensity from baseline) will be tested using the two-sample t-test or Wilcoxon rank-sum test, as  
14 appropriate at individual time points (0, 15, 30 minutes) after intervention. Mixed effects models  
15 for repeated measures (change in pain intensity from baseline) with high or low anxiety  
16 sensitivity (or pain catastrophizing) group, time (0, 15, 30 minutes after intervention), and group  
17 and time interaction will be used to test the hypothesis that patients with greater anxiety  
18 sensitivity and pain catastrophizing will have a larger reduction in pain vs. patients with less  
19 anxiety sensitivity and pain catastrophizing. Assuming the same SD and correlation between  
20 pain intensity measurement pairs from the primary power analysis, sample size of 15/group (high  
21 vs. low anxiety or pain catastrophizing dichotomized at median for the VR-GR group) will have  
22 80% power to detect differences in mean changes of pain intensity of 1.3 between the two  
23 groups, with  $\alpha=0.05$ . The same analysis will be repeated for pain unpleasantness and anxiety.  
24  
25  
26  
27  
28  
29  
30  
31  
32  
33

34  
35 We will make every effort to ensure that at least one daily VR session will be completed for each  
36 study participant and that all data extraction will be complete to avoid missing data. We will  
37 assess missing data for all study variables. Chart review for missing data on demographics,  
38 medical history, etc. will be performed when feasible. Missing outcome data will be statistically  
39 imputed using multiple imputation, and a sensitivity analysis will be conducted to compare  
40 analysis results with and without imputation.  
41  
42  
43  
44  
45

## 46 **ETHICS SAFETY AND DISSEMINATION**

### 47 **Ethics**

48  
49 This study is being conducted in accordance with the rules and regulations applicable to the  
50 conduct of ethical research and this study protocol has been approved by the IRB at CCHMC  
51 (IRB #2019-1090). This protocol includes clear delineation of the protocol version identifier and  
52 date on each protocol amendment submitted to the IRB; clear delineation of plans for data entry,  
53  
54  
55  
56  
57

1  
2  
3 coding, security, and storage; clear delineation of mechanisms to ensure patient confidentiality,  
4 including how personal information will be collected, shared, and maintained in order to protect  
5 confidentiality before, during, and after the trial; statements regarding who has access to data  
6 collected during this study; and a model consent form and other related documentation given to  
7 participants and/or guardians. We do not anticipate any major protocol modifications during the  
8 duration of this study.  
9  
10  
11  
12

### 13 14 15 **Safety**

16 It is anticipated that the risk to participants in this study is minimal. The specific VR device used  
17 in this study is a minimal risk device, and because it is considered a relaxation device by the  
18 FDA, it is not regulated as a clinical device. Risks specific to VR are minimal, with the greatest  
19 risk being motion sickness and/or nausea while the headset is in place.<sup>45</sup> There is a theoretical  
20 risk of inducing seizures (0.025% in a pediatric data set supplied by a similar Samsung device).  
21 We will minimize these risks by excluding patients with a history of significant neurological  
22 disorders, including epilepsy and severe motion sickness/nausea. Patients will also be explicitly  
23 instructed to remove the headset should any side effects or discomfort occur. The PI will  
24 continually monitor all risks to the participants. Weekly lab meetings will be used to address  
25 quality assurance and safety concerns with the study. Research personnel are instructed to inform  
26 the PI immediately with any safety concerns or adverse events (AEs). The IRB will also be  
27 updated when any serious AEs (SAEs) occur or when mild or moderate AEs determined to be a  
28 result from study participation occur. SAEs that are unanticipated, serious, and possibly related  
29 to study participation will be reported to the data safety monitoring committee (DSMC), IRB,  
30 and any other necessary study regulatory committee. We do not anticipate any SAEs that would  
31 require stopping this trial early. Therefore, we do not plan to conduct interim analysis for safety.  
32 This consideration will change if SAEs are reported during the study.  
33  
34  
35  
36  
37  
38  
39  
40  
41  
42  
43  
44

45 Although the risk to patients from this clinical trial is low, a DSMC will be utilized to monitor  
46 safety. The DSMC will be composed of three experts (clinical research, pain management, and  
47 digital technology) who are independent of the protocol. The DSMC will report to the IRB. This  
48 protocol is approved by the IRB at CCHMC in compliance with existing regulations and policies  
49 for the conduct of clinical research.  
50  
51  
52  
53  
54  
55  
56  
57  
58  
59  
60

### **Dissemination**

Unique data will be obtained from this research and will be widely disseminated through conference presentations at national and international meetings and through publication of manuscripts in peer-reviewed publications. Participants may receive trial results if interested. All authors are eligible to participate in dissemination and we do not plan to use professional writers to disseminate study results.

### **Patient and public involvement**

No patients or members of the public were involved in the design, recruitment, or conduct of this study. Consideration of the burden of the intervention and time required to participate in this research was assessed during pilot data collection using VR in the acute postoperative pain population at our institution and information gathered from this pilot study helped guide the development of this clinical trial. Participants may receive information about study results if they wish via a letter describing results to participants. We will share access to the full protocol to requesting individuals/institutions.

## **AUTHOR CONTRIBUTIONS**

VO, SW, and CK contributed to the conception of this idea, the design of the research protocol and study, and the writing of this manuscript. KO, CB, GM, SG, and KJ provided input regarding the design and implementation of the study protocol and procedures. LD and GY contributed to the design of the research protocol and the statistical analysis plan development. All authors revised and modified this manuscript. They will all approve the final version.

## **FUNDING**

This study is supported by an internal CCHMC research grant, Research Innovation/Pilot Funding Program as well as the Anesthesiology Department at CCHMC. Award/grant number not applicable.

## **DATA STATEMENT**

Technical appendix, statistical code, and/or the study dataset will be available to the public following study completion.

## **COMPETING INTERESTS**

The authors have no competing interests to disclose.

## **ACKNOWLEDGEMENTS**

The authors have no acknowledgements to disclose.

## REFERENCES

1. Hudgins JD, Porter JJ, Monuteaux MC, et al. Trends in Opioid Prescribing for Adolescents and Young Adults in Ambulatory Care Settings. *Pediatrics* 2019; 143: 1-9. 2019/05/30. DOI: 10.1542/peds.2018-1578.
2. Johnston L.D. MRA, O'Malley P.M., et al. Key Findings on Adolescent Drug Use. *National Survey Results on Drug Use 1975-2017* 2017.
3. Harbaugh CM, Lee JS, Hu HM, et al. Persistent Opioid Use Among Pediatric Patients After Surgery. *Pediatrics* 2018; 141 2017/12/06. DOI: 10.1542/peds.2017-2439.
4. Chambers RA, Taylor JR and Potenza MN. Developmental neurocircuitry of motivation in adolescence: a critical period of addiction vulnerability. *Am J Psychiatry* 2003; 160: 1041-1052. 2003/06/05. DOI: 10.1176/appi.ajp.160.6.1041.
5. Rabbitts JA and Kain Z. Perioperative Care for Adolescents Undergoing Major Surgery: A Biopsychosocial Conceptual Framework. *Anesthesia and Analgesia* 2019; 129: 1181-1184. DOI: 10.1213/Ane.0000000000004048.
6. Callinan CE, Neuman MD, Lacy KE, et al. The Initiation of Chronic Opioids: A Survey of Chronic Pain Patients. *J Pain* 2017; 18: 360-365. 2016/12/07. DOI: 10.1016/j.jpain.2016.11.001.
7. Shah A, Hayes CJ and Martin BC. Characteristics of Initial Prescription Episodes and Likelihood of Long-Term Opioid Use - United States, 2006-2015. *MMWR Morb Mortal Wkly Rep* 2017; 66: 265-269. 2017/03/17. DOI: 10.15585/mmwr.mm6610a1.
8. Fortier MA, Chou J, Maurer EL, et al. Acute to chronic postoperative pain in children: preliminary findings. *J Pediatr Surg* 2011; 46: 1700-1705. 2011/09/21. DOI: 10.1016/j.jpedsurg.2011.03.074.
9. Kelly RE, Jr., Shamberger RC, Mellins RB, et al. Prospective multicenter study of surgical correction of pectus excavatum: design, perioperative complications, pain, and baseline pulmonary function facilitated by internet-based data collection. *J Am Coll Surg* 2007; 205: 205-216. 2007/07/31. DOI: 10.1016/j.jamcollsurg.2007.03.027.
10. Muhly WT, Beltran RJ, Bielsky A, et al. Perioperative Management and In-Hospital Outcomes After Minimally Invasive Repair of Pectus Excavatum: A Multicenter Registry Report From the Society for Pediatric Anesthesia Improvement Network. *Anesth Analg* 2019; 128: 315-327. 2018/10/23. DOI: 10.1213/ANE.0000000000003829.
11. Groenewald CB, Rabbitts JA, Schroeder DR, et al. Prevalence of moderate-severe pain in hospitalized children. *Paediatr Anaesth* 2012; 22: 661-668. 2012/02/16. DOI: 10.1111/j.1460-9592.2012.03807.x.
12. Kozlowski LJ, Kost-Byerly S, Colantuoni E, et al. Pain prevalence, intensity, assessment and management in a hospitalized pediatric population. *Pain Manag Nurs* 2014; 15: 22-35. 2014/03/08. DOI: 10.1016/j.pmn.2012.04.003.
13. Rabbitts JA, Zhou C, Groenewald CB, et al. Trajectories of postsurgical pain in children: risk factors and impact of late pain recovery on long-term health outcomes after major surgery. *Pain* 2015; 156: 2383-2389. 2015/09/19. DOI: 10.1097/j.pain.0000000000000281.
14. Gan TJ. Poorly controlled postoperative pain: prevalence, consequences, and prevention. *J Pain Res* 2017; 10: 2287-2298. 2017/10/14. DOI: 10.2147/JPR.S144066.
15. Peters ML, Sommer M, de Rijke JM, et al. Somatic and psychologic predictors of long-term unfavorable outcome after surgical intervention. *Ann Surg* 2007; 245: 487-494. 2007/04/17. DOI: 10.1097/01.sla.0000245495.79781.65.



16. Tick H, Nielsen A, Pelletier KR, et al. Evidence-Based Nonpharmacologic Strategies for Comprehensive Pain Care: The Consortium Pain Task Force White Paper. *Explore (NY)* 2018; 14: 177-211. 2018/05/08. DOI: 10.1016/j.explore.2018.02.001.
17. Carrougher GJ, Hoffman HG, Nakamura D, et al. The effect of virtual reality on pain and range of motion in adults with burn injuries. *J Burn Care Res* 2009; 30: 785-791. 2009/08/21. DOI: 10.1097/BCR.0b013e3181b485d3.
18. Tashjian VC, Mosadeghi S, Howard AR, et al. Virtual Reality for Management of Pain in Hospitalized Patients: Results of a Controlled Trial. *JMIR Ment Health* 2017; 4: e9. 2017/03/31. DOI: 10.2196/mental.7387.
19. Spiegel B, Fuller G, Lopez M, et al. Virtual reality for management of pain in hospitalized patients: A randomized comparative effectiveness trial. *PLoS One* 2019; 14: e0219115. 2019/08/15. DOI: 10.1371/journal.pone.0219115.
20. Morris LD, Louw QA and Grimmer-Somers K. The effectiveness of virtual reality on reducing pain and anxiety in burn injury patients: a systematic review. *Clin J Pain* 2009; 25: 815-826. 2009/10/24. DOI: 10.1097/AJP.0b013e3181aaa909.
21. Malloy KM and Milling LS. The effectiveness of virtual reality distraction for pain reduction: a systematic review. *Clin Psychol Rev* 2010; 30: 1011-1018. 2010/08/10. DOI: 10.1016/j.cpr.2010.07.001.
22. Hoffman HG, Doctor JN, Patterson DR, et al. Virtual reality as an adjunctive pain control during burn wound care in adolescent patients. *Pain* 2000; 85: 305-309. 2000/02/29.
23. Li A, Montano Z, Chen VJ, et al. Virtual reality and pain management: current trends and future directions. *Pain Manag* 2011; 1: 147-157. 2011/07/23. DOI: 10.2217/pmt.10.15.
24. Garrett B, Taverner T, Masinde W, et al. A rapid evidence assessment of immersive virtual reality as an adjunct therapy in acute pain management in clinical practice. *Clin J Pain* 2014; 30: 1089-1098. 2014/02/19. DOI: 10.1097/AJP.0000000000000064.
25. Gold JI, Kim SH, Kant AJ, et al. Effectiveness of virtual reality for pediatric pain distraction during i.v. placement. *Cyberpsychol Behav* 2006; 9: 207-212. 2006/04/28. DOI: 10.1089/cpb.2006.9.207.
26. Furman E, Jasinevicius TR, Bissada NF, et al. Virtual reality distraction for pain control during periodontal scaling and root planing procedures. *J Am Dent Assoc* 2009; 140: 1508-1516. 2009/12/04.
27. Gold JI and Mahrer NE. Is Virtual Reality Ready for Prime Time in the Medical Space? A Randomized Control Trial of Pediatric Virtual Reality for Acute Procedural Pain Management. *J Pediatr Psychol* 2018; 43: 266-275. 2017/10/21. DOI: 10.1093/jpepsy/jsx129.
28. Indovina P, Barone D, Gallo L, et al. Virtual Reality as a Distraction Intervention to Relieve Pain and Distress During Medical Procedures: A Comprehensive Literature Review. *Clin J Pain* 2018; 34: 858-877. 2018/02/28. DOI: 10.1097/AJP.0000000000000599.
29. Cacau Lde A, Oliveira GU, Maynard LG, et al. The use of the virtual reality as intervention tool in the postoperative of cardiac surgery. *Rev Bras Cir Cardiovasc* 2013; 28: 281-289. 2013/08/14. DOI: 10.5935/1678-9741.20130039.
30. Mosso-Vazquez JL, Gao K, Wiederhold BK, et al. Virtual reality for pain management in cardiac surgery. *Cyberpsychol Behav Soc Netw* 2014; 17: 371-378. 2014/06/04. DOI: 10.1089/cyber.2014.0198.
31. Frey DP, Bauer ME, Bell CL, et al. Virtual Reality Analgesia in Labor: The VRAIL Pilot Study-A Preliminary Randomized Controlled Trial Suggesting Benefit of Immersive Virtual

- 1  
2  
3 Reality Analgesia in Unmedicated Laboring Women. *Anesth Analg* 2019; 128: e93-e96.  
4 2019/05/17. DOI: 10.1213/ANE.0000000000003649.
- 5 32. JahaniShoorab N, Ebrahimzadeh Zagami S, Nahvi A, et al. The Effect of Virtual Reality  
6 on Pain in Primiparity Women during Episiotomy Repair: A Randomize Clinical Trial. *Iran J*  
7 *Med Sci* 2015; 40: 219-224. 2015/05/23.
- 8 33. Van Ryckeghem DM, Van Damme S, Eccleston C, et al. The efficacy of attentional  
9 distraction and sensory monitoring in chronic pain patients: A meta-analysis. *Clin Psychol Rev*  
10 2018; 59: 16-29. 2017/11/12. DOI: 10.1016/j.cpr.2017.10.008.
- 11 34. Gupta A, Scott K and Dukewich M. Innovative Technology Using Virtual Reality in the  
12 Treatment of Pain: Does It Reduce Pain via Distraction, or Is There More to It? *Pain Med* 2018;  
13 19: 151-159. 2017/10/13. DOI: 10.1093/pm/pnx109.
- 14 35. Vagnoli L, Bettini A, Amore E, et al. Relaxation-guided imagery reduces perioperative  
15 anxiety and pain in children: a randomized study. *Eur J Pediatr* 2019; 178: 913-921. 2019/04/05.  
16 DOI: 10.1007/s00431-019-03376-x.
- 17 36. Zaccaro A, Piarulli A, Laurino M, et al. How Breath-Control Can Change Your Life: A  
18 Systematic Review on Psycho-Physiological Correlates of Slow Breathing. *Front Hum Neurosci*  
19 2018; 12: 353. 2018/09/25. DOI: 10.3389/fnhum.2018.00353.
- 20 37. Lehrer PM and Gevirtz R. Heart rate variability biofeedback: how and why does it work?  
21 *Front Psychol* 2014; 5: 756. 2014/08/08. DOI: 10.3389/fpsyg.2014.00756.
- 22 38. Sowder E, Gevirtz R, Shapiro W, et al. Restoration of vagal tone: a possible mechanism  
23 for functional abdominal pain. *Appl Psychophysiol Biofeedback* 2010; 35: 199-206. 2010/03/17.  
24 DOI: 10.1007/s10484-010-9128-8.
- 25 39. Peng P, Stinson JN, Choiniere M, et al. Dedicated multidisciplinary pain management  
26 centres for children in Canada: the current status. *Can J Anaesth* 2007; 54: 985-991. 2007/12/07.  
27 DOI: 10.1007/BF03016632.
- 28 40. Harris K and Reid D. The influence of virtual reality play on children's motivation. *Can J*  
29 *Occup Ther* 2005; 72: 21-29. 2005/02/25. DOI: 10.1177/000841740507200107.
- 30 41. Crombez G, Bijttebier P, Eccleston C, et al. The child version of the pain catastrophizing  
31 scale (PCS-C): a preliminary validation. *Pain* 2003; 104: 639-646. 2003/08/21.
- 32 42. Silverman WK, Goedhart AW, Barrett P, et al. The facets of anxiety sensitivity  
33 represented in the childhood anxiety sensitivity index: confirmatory analyses of factor models  
34 from past studies. *J Abnorm Psychol* 2003; 112: 364-374. 2003/08/29.
- 35 43. Tsze DS, von Baeyer CL, Pahalyants V, et al. Validity and Reliability of the Verbal  
36 Numerical Rating Scale for Children Aged 4 to 17 Years With Acute Pain. *Ann Emerg Med*  
37 2018; 71: 691-702 e693. 2017/11/07. DOI: 10.1016/j.annemergmed.2017.09.009.
- 38 44. Miro J, Castarlenas E and Huguet A. Evidence for the use of a numerical rating scale to  
39 assess the intensity of pediatric pain. *Eur J Pain* 2009; 13: 1089-1095. 2009/09/04. DOI:  
40 10.1016/j.ejpain.2009.07.002.
- 41 45. Nichols S and Patel H. Health and safety implications of virtual reality: a review of  
42 empirical evidence. *Appl Ergon* 2002; 33: 251-271. 2002/08/08.
- 43  
44  
45  
46  
47  
48  
49  
50  
51  
52  
53  
54  
55  
56  
57  
58  
59  
60

1  
2  
3 **Table 1. Scales and questionnaires used in the study**  
4

5 **Figure 1. Study flow chart (CONSORT Diagram)**  
6

7  
8 **Figure 2. Experimental design of the study**  
9  
10  
11  
12  
13  
14  
15  
16  
17  
18  
19  
20  
21  
22  
23  
24  
25  
26  
27  
28  
29  
30  
31  
32  
33  
34  
35  
36  
37  
38  
39  
40  
41  
42  
43  
44  
45  
46  
47  
48  
49  
50  
51  
52  
53  
54  
55  
56  
57  
58  
59  
60

For peer review only

1  
2  
3 **Table 1. Scales and questionnaires used in the study**  
4  
5  
6  
7

| <b>Table 1. Scales and questionnaires for the study</b>                                                                                                                                                                                                                                                                                                                           |
|-----------------------------------------------------------------------------------------------------------------------------------------------------------------------------------------------------------------------------------------------------------------------------------------------------------------------------------------------------------------------------------|
| <b><u>Numerical Rating Scale (NRS)</u>. Numerical rating scale where children are asked to give a number on a scale of 0 to 10 of how bad their pain hurts, with 0 being no pain and 10 being the worst pain of their life.</b>                                                                                                                                                   |
| <b><u>Pain Catastrophizing Scale for Children (PCS-C)</u>. Children rate 13 items assessing rumination, magnification, and helplessness related to thoughts about pain. PCS summary scores can be interpreted as low (0 to 14), moderate (15 to 25), and high (<math>\geq 26</math>). Internal reliability for our VR-D pilot data was 0.94 (Cronbach's <math>\alpha</math>).</b> |
| <b><u>Child Anxiety Sensitivity Index (CASI)</u>. 18-item self-report tool designed to measure symptoms of anxiety in children and adolescents, with total scores ranging from 18-54. Internal reliability for our VR-D pilot data was 0.84 (Cronbach's <math>\alpha</math>).</b>                                                                                                 |

1  
2  
3  
4  
5  
6  
7  
8  
9  
10  
11  
12  
13  
14  
15  
16  
17  
18  
19  
20  
21  
22  
23  
24  
25  
26  
27  
28  
29  
30  
31  
32  
33  
34  
35  
36  
37  
38  
39  
40  
41  
42  
43  
44  
45  
46  
47  
48  
49  
50  
51  
52  
53  
54  
55  
56  
57  
58  
59  
60

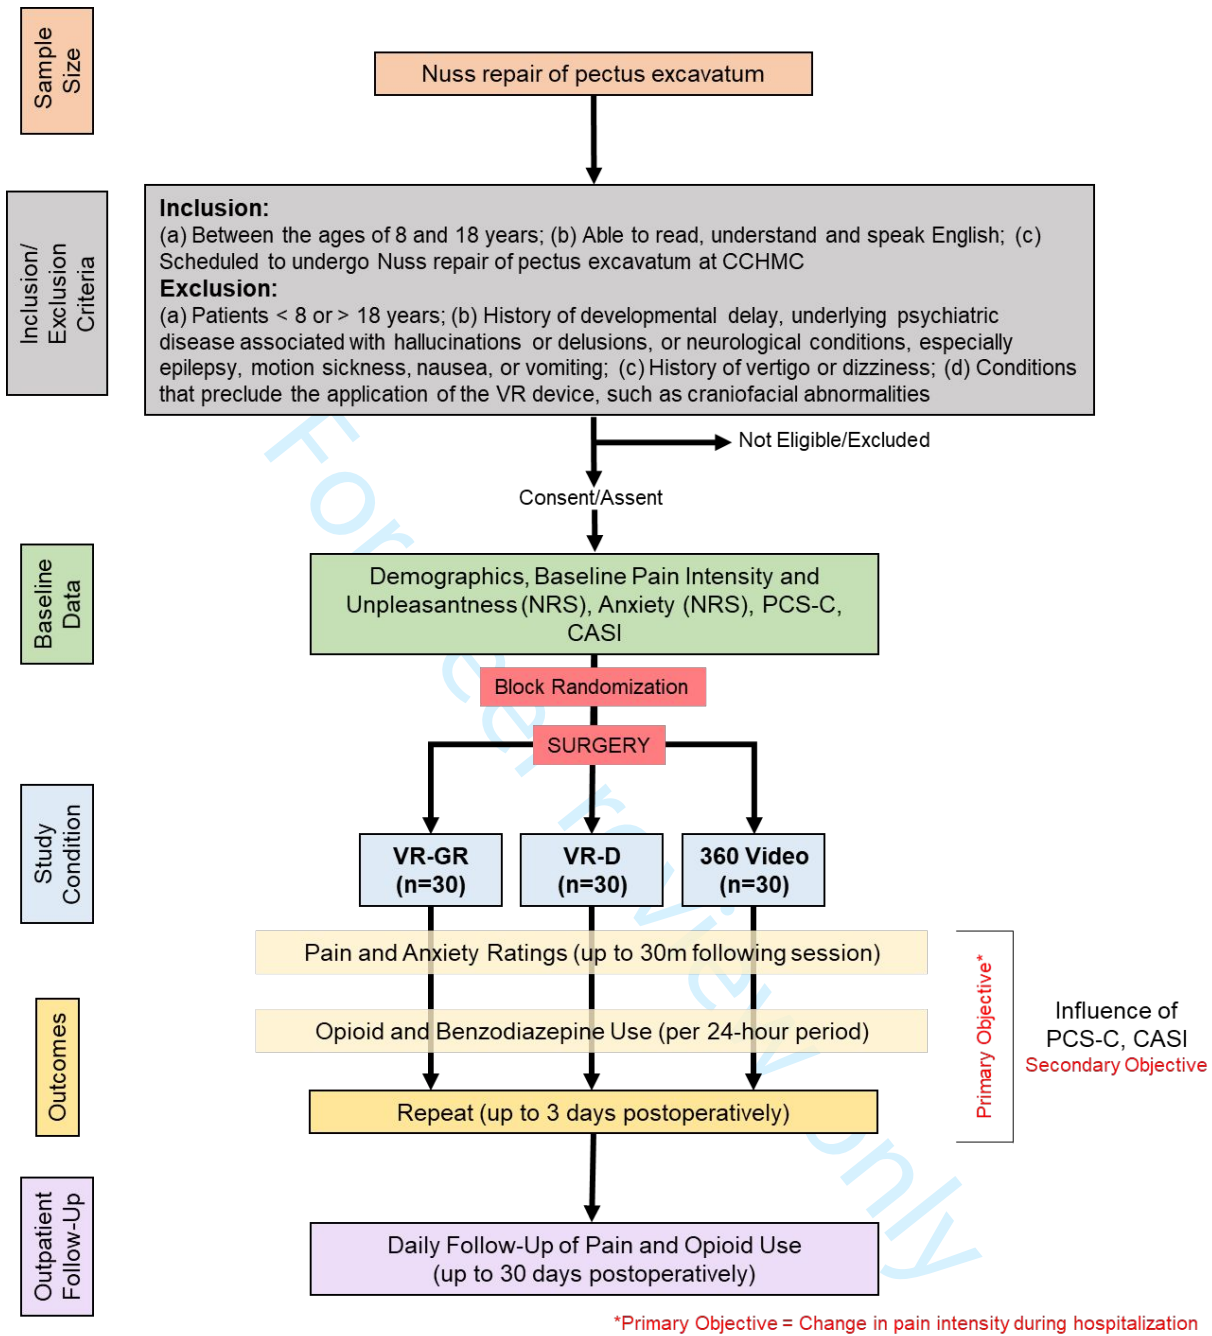

Figure 2. Experimental design of the study

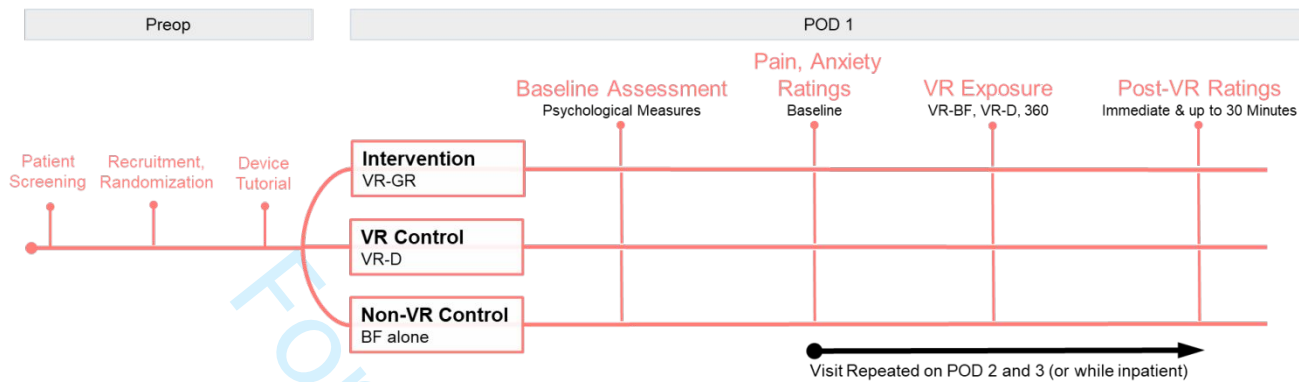

# Reporting checklist for protocol of a clinical trial.

Based on the SPIRIT guidelines.

## Instructions to authors

Complete this checklist by entering the page numbers from your manuscript where readers will find each of the items listed below.

Your article may not currently address all the items on the checklist. Please modify your text to include the missing information. If you are certain that an item does not apply, please write "n/a" and provide a short explanation.

Upload your completed checklist as an extra file when you submit to a journal.

In your methods section, say that you used the SPIRIT reporting guidelines, and cite them as:

Chan A-W, Tetzlaff JM, Altman DG, Laupacis A, Gøtzsche PC, Krleža-Jerić K, Hróbjartsson A, Mann H, Dickersin K, Berlin J, Doré C, Parulekar W, Summerskill W, Groves T, Schulz K, Sox H, Rockhold FW, Rennie D, Moher D. SPIRIT 2013 Statement: Defining standard protocol items for clinical trials. *Ann Intern Med.* 2013;158(3):200-207

|                                             |                     | Reporting Item                                                                                               | Page Number |
|---------------------------------------------|---------------------|--------------------------------------------------------------------------------------------------------------|-------------|
| <b>Administrative information</b>           |                     |                                                                                                              |             |
| Title                                       | <a href="#">#1</a>  | Descriptive title identifying the study design, population, interventions, and, if applicable, trial acronym | 1           |
| Trial registration                          | <a href="#">#2a</a> | Trial identifier and registry name. If not yet registered, name of intended registry                         | 2           |
| Trial registration: data set                | <a href="#">#2b</a> | All items from the World Health Organization Trial Registration Data Set                                     | 2, 6        |
| Protocol version                            | <a href="#">#3</a>  | Date and version identifier                                                                                  | 12          |
| Funding                                     | <a href="#">#4</a>  | Sources and types of financial, material, and other support                                                  | 13          |
| Roles and responsibilities: contributorship | <a href="#">#5a</a> | Names, affiliations, and roles of protocol contributors                                                      | 1, 13       |

|    |                           |                     |                                                                      |      |
|----|---------------------------|---------------------|----------------------------------------------------------------------|------|
| 1  | Roles and                 | <a href="#">#5b</a> | Name and contact information for the trial sponsor                   | n/a  |
| 2  | responsibilities:         |                     |                                                                      |      |
| 3  | sponsor contact           |                     |                                                                      |      |
| 4  | information               |                     |                                                                      |      |
| 5  |                           |                     |                                                                      |      |
| 6  |                           |                     |                                                                      |      |
| 7  |                           |                     |                                                                      |      |
| 8  | Roles and                 | <a href="#">#5c</a> | Role of study sponsor and funders, if any, in study design;          | 13   |
| 9  | responsibilities:         |                     | collection, management, analysis, and interpretation of data;        |      |
| 10 | sponsor and funder        |                     | writing of the report; and the decision to submit the report for     |      |
| 11 |                           |                     | publication, including whether they will have ultimate authority     |      |
| 12 |                           |                     | over any of these activities                                         |      |
| 13 |                           |                     |                                                                      |      |
| 14 |                           |                     |                                                                      |      |
| 15 |                           |                     |                                                                      |      |
| 16 | Roles and                 | <a href="#">#5d</a> | Composition, roles, and responsibilities of the coordinating centre, | n/a  |
| 17 | responsibilities:         |                     | steering committee, endpoint adjudication committee, data            |      |
| 18 | committees                |                     | management team, and other individuals or groups overseeing the      |      |
| 19 |                           |                     | trial, if applicable (see Item 21a for data monitoring committee)    |      |
| 20 |                           |                     |                                                                      |      |
| 21 |                           |                     |                                                                      |      |
| 22 |                           |                     |                                                                      |      |
| 23 | <b>Introduction</b>       |                     |                                                                      |      |
| 24 |                           |                     |                                                                      |      |
| 25 | Background and            | <a href="#">#6a</a> | Description of research question and justification for undertaking   | 4-5  |
| 26 | rationale                 |                     | the trial, including summary of relevant studies (published and      |      |
| 27 |                           |                     | unpublished) examining benefits and harms for each intervention      |      |
| 28 |                           |                     |                                                                      |      |
| 29 |                           |                     |                                                                      |      |
| 30 | Background and            | <a href="#">#6b</a> | Explanation for choice of comparators                                | 4-5  |
| 31 | rationale: choice of      |                     |                                                                      |      |
| 32 | comparators               |                     |                                                                      |      |
| 33 |                           |                     |                                                                      |      |
| 34 |                           |                     |                                                                      |      |
| 35 |                           |                     |                                                                      |      |
| 36 | Objectives                | <a href="#">#7</a>  | Specific objectives or hypotheses                                    | 5    |
| 37 |                           |                     |                                                                      |      |
| 38 | Trial design              | <a href="#">#8</a>  | Description of trial design including type of trial (eg, parallel    | 5, 6 |
| 39 |                           |                     | group, crossover, factorial, single group), allocation ratio, and    |      |
| 40 |                           |                     | framework (eg, superiority, equivalence, non-inferiority,            |      |
| 41 |                           |                     | exploratory)                                                         |      |
| 42 |                           |                     |                                                                      |      |
| 43 |                           |                     |                                                                      |      |
| 44 |                           |                     |                                                                      |      |
| 45 | <b>Methods:</b>           |                     |                                                                      |      |
| 46 | <b>Participants,</b>      |                     |                                                                      |      |
| 47 | <b>interventions, and</b> |                     |                                                                      |      |
| 48 | <b>outcomes</b>           |                     |                                                                      |      |
| 49 |                           |                     |                                                                      |      |
| 50 |                           |                     |                                                                      |      |
| 51 | Study setting             | <a href="#">#9</a>  | Description of study settings (eg, community clinic, academic        | 6    |
| 52 |                           |                     | hospital) and list of countries where data will be collected.        |      |
| 53 |                           |                     | Reference to where list of study sites can be obtained               |      |
| 54 |                           |                     |                                                                      |      |
| 55 |                           |                     |                                                                      |      |
| 56 |                           |                     |                                                                      |      |
| 57 | Eligibility criteria      | <a href="#">#10</a> | Inclusion and exclusion criteria for participants. If applicable,    | 7    |
| 58 |                           |                     | eligibility criteria for study centres and individuals who will      |      |
| 59 |                           |                     |                                                                      |      |
| 60 |                           |                     |                                                                      |      |



perform the interventions (eg, surgeons, psychotherapists)

|    |                      |                      |                                                                       |
|----|----------------------|----------------------|-----------------------------------------------------------------------|
| 1  |                      |                      |                                                                       |
| 2  |                      |                      |                                                                       |
| 3  | Interventions:       | <a href="#">#11a</a> | Interventions for each group with sufficient detail to allow          |
| 4  | description          |                      | replication, including how and when they will be administered         |
| 5  |                      |                      |                                                                       |
| 6  | Interventions:       | <a href="#">#11b</a> | Criteria for discontinuing or modifying allocated interventions for a |
| 7  | modifications        |                      | given trial participant (eg, drug dose change in response to harms,   |
| 8  |                      |                      | participant request, or improving / worsening disease)                |
| 9  |                      |                      |                                                                       |
| 10 |                      |                      |                                                                       |
| 11 | Interventions:       | <a href="#">#11c</a> | Strategies to improve adherence to intervention protocols, and any    |
| 12 | adherence            |                      | procedures for monitoring adherence (eg, drug tablet return;          |
| 13 |                      |                      | laboratory tests)                                                     |
| 14 |                      |                      |                                                                       |
| 15 |                      |                      |                                                                       |
| 16 |                      |                      |                                                                       |
| 17 | Interventions:       | <a href="#">#11d</a> | Relevant concomitant care and interventions that are permitted or     |
| 18 | concomitant care     |                      | prohibited during the trial                                           |
| 19 |                      |                      |                                                                       |
| 20 |                      |                      |                                                                       |
| 21 | Outcomes             | <a href="#">#12</a>  | Primary, secondary, and other outcomes, including the specific        |
| 22 |                      |                      | measurement variable (eg, systolic blood pressure), analysis metric   |
| 23 |                      |                      | (eg, change from baseline, final value, time to event), method of     |
| 24 |                      |                      | aggregation (eg, median, proportion), and time point for each         |
| 25 |                      |                      | outcome. Explanation of the clinical relevance of chosen efficacy     |
| 26 |                      |                      | and harm outcomes is strongly recommended                             |
| 27 |                      |                      |                                                                       |
| 28 |                      |                      |                                                                       |
| 29 |                      |                      |                                                                       |
| 30 | Participant timeline | <a href="#">#13</a>  | Time schedule of enrolment, interventions (including any run-ins      |
| 31 |                      |                      | and washouts), assessments, and visits for participants. A            |
| 32 |                      |                      | schematic diagram is highly recommended (see Figure)                  |
| 33 |                      |                      |                                                                       |
| 34 |                      |                      |                                                                       |
| 35 |                      |                      |                                                                       |
| 36 | Sample size          | <a href="#">#14</a>  | Estimated number of participants needed to achieve study              |
| 37 |                      |                      | objectives and how it was determined, including clinical and          |
| 38 |                      |                      | statistical assumptions supporting any sample size calculations       |
| 39 |                      |                      |                                                                       |
| 40 |                      |                      |                                                                       |
| 41 | Recruitment          | <a href="#">#15</a>  | Strategies for achieving adequate participant enrolment to reach      |
| 42 |                      |                      | target sample size                                                    |
| 43 |                      |                      |                                                                       |
| 44 |                      |                      |                                                                       |

**Methods: Assignment  
of interventions (for  
controlled trials)**

|    |                      |                      |                                                                      |
|----|----------------------|----------------------|----------------------------------------------------------------------|
| 45 |                      |                      |                                                                      |
| 46 |                      |                      |                                                                      |
| 47 |                      |                      |                                                                      |
| 48 |                      |                      |                                                                      |
| 49 |                      |                      |                                                                      |
| 50 | Allocation: sequence | <a href="#">#16a</a> | Method of generating the allocation sequence (eg, computer-          |
| 51 | generation           |                      | generated random numbers), and list of any factors for               |
| 52 |                      |                      | stratification. To reduce predictability of a random sequence,       |
| 53 |                      |                      | details of any planned restriction (eg, blocking) should be provided |
| 54 |                      |                      | in a separate document that is unavailable to those who enrol        |
| 55 |                      |                      | participants or assign interventions                                 |
| 56 |                      |                      |                                                                      |
| 57 |                      |                      |                                                                      |
| 58 |                      |                      |                                                                      |
| 59 |                      |                      |                                                                      |
| 60 |                      |                      |                                                                      |

|    |                        |                      |                                                                                                                                                                                                                                                                                                                                                                                                              |       |
|----|------------------------|----------------------|--------------------------------------------------------------------------------------------------------------------------------------------------------------------------------------------------------------------------------------------------------------------------------------------------------------------------------------------------------------------------------------------------------------|-------|
| 1  | Allocation concealment | <a href="#">#16b</a> | Mechanism of implementing the allocation sequence (eg, central telephone; sequentially numbered, opaque, sealed envelopes), describing any steps to conceal the sequence until interventions are assigned                                                                                                                                                                                                    | n/a   |
| 2  | mechanism              |                      |                                                                                                                                                                                                                                                                                                                                                                                                              |       |
| 3  |                        |                      |                                                                                                                                                                                                                                                                                                                                                                                                              |       |
| 4  |                        |                      |                                                                                                                                                                                                                                                                                                                                                                                                              |       |
| 5  |                        |                      |                                                                                                                                                                                                                                                                                                                                                                                                              |       |
| 6  |                        |                      |                                                                                                                                                                                                                                                                                                                                                                                                              |       |
| 7  |                        |                      |                                                                                                                                                                                                                                                                                                                                                                                                              |       |
| 8  | Allocation:            | <a href="#">#16c</a> | Who will generate the allocation sequence, who will enrol participants, and who will assign participants to interventions                                                                                                                                                                                                                                                                                    | 9     |
| 9  | implementation         |                      |                                                                                                                                                                                                                                                                                                                                                                                                              |       |
| 10 |                        |                      |                                                                                                                                                                                                                                                                                                                                                                                                              |       |
| 11 | Blinding (masking)     | <a href="#">#17a</a> | Who will be blinded after assignment to interventions (eg, trial participants, care providers, outcome assessors, data analysts), and how                                                                                                                                                                                                                                                                    | n/a   |
| 12 |                        |                      |                                                                                                                                                                                                                                                                                                                                                                                                              |       |
| 13 |                        |                      |                                                                                                                                                                                                                                                                                                                                                                                                              |       |
| 14 |                        |                      |                                                                                                                                                                                                                                                                                                                                                                                                              |       |
| 15 |                        |                      |                                                                                                                                                                                                                                                                                                                                                                                                              |       |
| 16 |                        |                      |                                                                                                                                                                                                                                                                                                                                                                                                              |       |
| 17 | Blinding (masking):    | <a href="#">#17b</a> | If blinded, circumstances under which unblinding is permissible, and procedure for revealing a participant's allocated intervention during the trial                                                                                                                                                                                                                                                         | n/a   |
| 18 | emergency unblinding   |                      |                                                                                                                                                                                                                                                                                                                                                                                                              |       |
| 19 |                        |                      |                                                                                                                                                                                                                                                                                                                                                                                                              |       |
| 20 |                        |                      |                                                                                                                                                                                                                                                                                                                                                                                                              |       |
| 21 |                        |                      |                                                                                                                                                                                                                                                                                                                                                                                                              |       |
| 22 | <b>Methods: Data</b>   |                      |                                                                                                                                                                                                                                                                                                                                                                                                              |       |
| 23 | <b>collection,</b>     |                      |                                                                                                                                                                                                                                                                                                                                                                                                              |       |
| 24 | <b>management, and</b> |                      |                                                                                                                                                                                                                                                                                                                                                                                                              |       |
| 25 | <b>analysis</b>        |                      |                                                                                                                                                                                                                                                                                                                                                                                                              |       |
| 26 |                        |                      |                                                                                                                                                                                                                                                                                                                                                                                                              |       |
| 27 |                        |                      |                                                                                                                                                                                                                                                                                                                                                                                                              |       |
| 28 |                        |                      |                                                                                                                                                                                                                                                                                                                                                                                                              |       |
| 29 | Data collection plan   | <a href="#">#18a</a> | Plans for assessment and collection of outcome, baseline, and other trial data, including any related processes to promote data quality (eg, duplicate measurements, training of assessors) and a description of study instruments (eg, questionnaires, laboratory tests) along with their reliability and validity, if known. Reference to where data collection forms can be found, if not in the protocol | 9-10  |
| 30 |                        |                      |                                                                                                                                                                                                                                                                                                                                                                                                              |       |
| 31 |                        |                      |                                                                                                                                                                                                                                                                                                                                                                                                              |       |
| 32 |                        |                      |                                                                                                                                                                                                                                                                                                                                                                                                              |       |
| 33 |                        |                      |                                                                                                                                                                                                                                                                                                                                                                                                              |       |
| 34 |                        |                      |                                                                                                                                                                                                                                                                                                                                                                                                              |       |
| 35 |                        |                      |                                                                                                                                                                                                                                                                                                                                                                                                              |       |
| 36 |                        |                      |                                                                                                                                                                                                                                                                                                                                                                                                              |       |
| 37 |                        |                      |                                                                                                                                                                                                                                                                                                                                                                                                              |       |
| 38 |                        |                      |                                                                                                                                                                                                                                                                                                                                                                                                              |       |
| 39 | Data collection plan:  | <a href="#">#18b</a> | Plans to promote participant retention and complete follow-up, including list of any outcome data to be collected for participants who discontinue or deviate from intervention protocols                                                                                                                                                                                                                    | 9     |
| 40 | retention              |                      |                                                                                                                                                                                                                                                                                                                                                                                                              |       |
| 41 |                        |                      |                                                                                                                                                                                                                                                                                                                                                                                                              |       |
| 42 |                        |                      |                                                                                                                                                                                                                                                                                                                                                                                                              |       |
| 43 |                        |                      |                                                                                                                                                                                                                                                                                                                                                                                                              |       |
| 44 | Data management        | <a href="#">#19</a>  | Plans for data entry, coding, security, and storage, including any related processes to promote data quality (eg, double data entry; range checks for data values). Reference to where details of data management procedures can be found, if not in the protocol                                                                                                                                            | 12    |
| 45 |                        |                      |                                                                                                                                                                                                                                                                                                                                                                                                              |       |
| 46 |                        |                      |                                                                                                                                                                                                                                                                                                                                                                                                              |       |
| 47 |                        |                      |                                                                                                                                                                                                                                                                                                                                                                                                              |       |
| 48 |                        |                      |                                                                                                                                                                                                                                                                                                                                                                                                              |       |
| 49 |                        |                      |                                                                                                                                                                                                                                                                                                                                                                                                              |       |
| 50 |                        |                      |                                                                                                                                                                                                                                                                                                                                                                                                              |       |
| 51 | Statistics: outcomes   | <a href="#">#20a</a> | Statistical methods for analysing primary and secondary outcomes. Reference to where other details of the statistical analysis plan can be found, if not in the protocol                                                                                                                                                                                                                                     | 10-11 |
| 52 |                        |                      |                                                                                                                                                                                                                                                                                                                                                                                                              |       |
| 53 |                        |                      |                                                                                                                                                                                                                                                                                                                                                                                                              |       |
| 54 |                        |                      |                                                                                                                                                                                                                                                                                                                                                                                                              |       |
| 55 |                        |                      |                                                                                                                                                                                                                                                                                                                                                                                                              |       |
| 56 | Statistics: additional | <a href="#">#20b</a> | Methods for any additional analyses (eg, subgroup and adjusted analyses)                                                                                                                                                                                                                                                                                                                                     | n/a   |
| 57 | analyses               |                      |                                                                                                                                                                                                                                                                                                                                                                                                              |       |
| 58 |                        |                      |                                                                                                                                                                                                                                                                                                                                                                                                              |       |
| 59 |                        |                      |                                                                                                                                                                                                                                                                                                                                                                                                              |       |
| 60 |                        |                      |                                                                                                                                                                                                                                                                                                                                                                                                              |       |

|    |                            |                      |                                                                         |       |
|----|----------------------------|----------------------|-------------------------------------------------------------------------|-------|
| 1  | Statistics: analysis       | <a href="#">#20c</a> | Definition of analysis population relating to protocol non-             | 11    |
| 2  | population and missing     |                      | adherence (eg, as randomised analysis), and any statistical methods     |       |
| 3  | data                       |                      | to handle missing data (eg, multiple imputation)                        |       |
| 4  |                            |                      |                                                                         |       |
| 5  |                            |                      |                                                                         |       |
| 6  | <b>Methods: Monitoring</b> |                      |                                                                         |       |
| 7  |                            |                      |                                                                         |       |
| 8  | Data monitoring:           | <a href="#">#21a</a> | Composition of data monitoring committee (DMC); summary of its          | 12    |
| 9  | formal committee           |                      | role and reporting structure; statement of whether it is independent    |       |
| 10 |                            |                      | from the sponsor and competing interests; and reference to where        |       |
| 11 |                            |                      | further details about its charter can be found, if not in the protocol. |       |
| 12 |                            |                      | Alternatively, an explanation of why a DMC is not needed                |       |
| 13 |                            |                      |                                                                         |       |
| 14 |                            |                      |                                                                         |       |
| 15 |                            |                      |                                                                         |       |
| 16 |                            |                      |                                                                         |       |
| 17 | Data monitoring:           | <a href="#">#21b</a> | Description of any interim analyses and stopping guidelines,            | 12-13 |
| 18 | interim analysis           |                      | including who will have access to these interim results and make        |       |
| 19 |                            |                      | the final decision to terminate the trial                               |       |
| 20 |                            |                      |                                                                         |       |
| 21 |                            |                      |                                                                         |       |
| 22 | Harms                      | <a href="#">#22</a>  | Plans for collecting, assessing, reporting, and managing solicited      | 12-13 |
| 23 |                            |                      | and spontaneously reported adverse events and other unintended          |       |
| 24 |                            |                      | effects of trial interventions or trial conduct                         |       |
| 25 |                            |                      |                                                                         |       |
| 26 |                            |                      |                                                                         |       |
| 27 | Auditing                   | <a href="#">#23</a>  | Frequency and procedures for auditing trial conduct, if any, and        | 12    |
| 28 |                            |                      | whether the process will be independent from investigators and the      |       |
| 29 |                            |                      | sponsor                                                                 |       |
| 30 |                            |                      |                                                                         |       |
| 31 |                            |                      |                                                                         |       |
| 32 |                            |                      |                                                                         |       |
| 33 | <b>Ethics and</b>          |                      |                                                                         |       |
| 34 | <b>dissemination</b>       |                      |                                                                         |       |
| 35 |                            |                      |                                                                         |       |
| 36 |                            |                      |                                                                         |       |
| 37 | Research ethics            | <a href="#">#24</a>  | Plans for seeking research ethics committee / institutional review      | 2, 12 |
| 38 | approval                   |                      | board (REC / IRB) approval                                              |       |
| 39 |                            |                      |                                                                         |       |
| 40 |                            |                      |                                                                         |       |
| 41 | Protocol amendments        | <a href="#">#25</a>  | Plans for communicating important protocol modifications (eg,           | 12    |
| 42 |                            |                      | changes to eligibility criteria, outcomes, analyses) to relevant        |       |
| 43 |                            |                      | parties (eg, investigators, REC / IRBs, trial participants, trial       |       |
| 44 |                            |                      | registries, journals, regulators)                                       |       |
| 45 |                            |                      |                                                                         |       |
| 46 |                            |                      |                                                                         |       |
| 47 | Consent or assent          | <a href="#">#26a</a> | Who will obtain informed consent or assent from potential trial         | 9     |
| 48 |                            |                      | participants or authorised surrogates, and how (see Item 32)            |       |
| 49 |                            |                      |                                                                         |       |
| 50 |                            |                      |                                                                         |       |
| 51 | Consent or assent:         | <a href="#">#26b</a> | Additional consent provisions for collection and use of participant     | n/a   |
| 52 | ancillary studies          |                      | data and biological specimens in ancillary studies, if applicable       |       |
| 53 |                            |                      |                                                                         |       |
| 54 |                            |                      |                                                                         |       |
| 55 | Confidentiality            | <a href="#">#27</a>  | How personal information about potential and enrolled participants      | 12    |
| 56 |                            |                      | will be collected, shared, and maintained in order to protect           |       |
| 57 |                            |                      | confidentiality before, during, and after the trial                     |       |
| 58 |                            |                      |                                                                         |       |
| 59 |                            |                      |                                                                         |       |
| 60 |                            |                      |                                                                         |       |

|    |                                             |                      |                                                                                                                                                                                                                                                                                     |     |
|----|---------------------------------------------|----------------------|-------------------------------------------------------------------------------------------------------------------------------------------------------------------------------------------------------------------------------------------------------------------------------------|-----|
| 1  | Declaration of interests                    | <a href="#">#28</a>  | Financial and other competing interests for principal investigators for the overall trial and each study site                                                                                                                                                                       | 14  |
| 2  |                                             |                      |                                                                                                                                                                                                                                                                                     |     |
| 3  |                                             |                      |                                                                                                                                                                                                                                                                                     |     |
| 4  |                                             |                      |                                                                                                                                                                                                                                                                                     |     |
| 5  | Data access                                 | <a href="#">#29</a>  | Statement of who will have access to the final trial dataset, and disclosure of contractual agreements that limit such access for investigators                                                                                                                                     | 12  |
| 6  |                                             |                      |                                                                                                                                                                                                                                                                                     |     |
| 7  |                                             |                      |                                                                                                                                                                                                                                                                                     |     |
| 8  |                                             |                      |                                                                                                                                                                                                                                                                                     |     |
| 9  |                                             |                      |                                                                                                                                                                                                                                                                                     |     |
| 10 | Ancillary and post trial care               | <a href="#">#30</a>  | Provisions, if any, for ancillary and post-trial care, and for compensation to those who suffer harm from trial participation                                                                                                                                                       | n/a |
| 11 |                                             |                      |                                                                                                                                                                                                                                                                                     |     |
| 12 |                                             |                      |                                                                                                                                                                                                                                                                                     |     |
| 13 |                                             |                      |                                                                                                                                                                                                                                                                                     |     |
| 14 | Dissemination policy: trial results         | <a href="#">#31a</a> | Plans for investigators and sponsor to communicate trial results to participants, healthcare professionals, the public, and other relevant groups (eg, via publication, reporting in results databases, or other data sharing arrangements), including any publication restrictions | 13  |
| 15 |                                             |                      |                                                                                                                                                                                                                                                                                     |     |
| 16 |                                             |                      |                                                                                                                                                                                                                                                                                     |     |
| 17 |                                             |                      |                                                                                                                                                                                                                                                                                     |     |
| 18 |                                             |                      |                                                                                                                                                                                                                                                                                     |     |
| 19 |                                             |                      |                                                                                                                                                                                                                                                                                     |     |
| 20 |                                             |                      |                                                                                                                                                                                                                                                                                     |     |
| 21 | Dissemination policy: authorship            | <a href="#">#31b</a> | Authorship eligibility guidelines and any intended use of professional writers                                                                                                                                                                                                      | 13  |
| 22 |                                             |                      |                                                                                                                                                                                                                                                                                     |     |
| 23 |                                             |                      |                                                                                                                                                                                                                                                                                     |     |
| 24 | Dissemination policy: reproducible research | <a href="#">#31c</a> | Plans, if any, for granting public access to the full protocol, participant-level dataset, and statistical code                                                                                                                                                                     | 13  |
| 25 |                                             |                      |                                                                                                                                                                                                                                                                                     |     |
| 26 |                                             |                      |                                                                                                                                                                                                                                                                                     |     |
| 27 |                                             |                      |                                                                                                                                                                                                                                                                                     |     |
| 28 | <b>Appendices</b>                           |                      |                                                                                                                                                                                                                                                                                     |     |
| 29 |                                             |                      |                                                                                                                                                                                                                                                                                     |     |
| 30 |                                             |                      |                                                                                                                                                                                                                                                                                     |     |
| 31 | Informed consent materials                  | <a href="#">#32</a>  | Model consent form and other related documentation given to participants and authorised surrogates                                                                                                                                                                                  | 12  |
| 32 |                                             |                      |                                                                                                                                                                                                                                                                                     |     |
| 33 |                                             |                      |                                                                                                                                                                                                                                                                                     |     |
| 34 |                                             |                      |                                                                                                                                                                                                                                                                                     |     |
| 35 | Biological specimens                        | <a href="#">#33</a>  | Plans for collection, laboratory evaluation, and storage of biological specimens for genetic or molecular analysis in the current trial and for future use in ancillary studies, if applicable                                                                                      | n/a |
| 36 |                                             |                      |                                                                                                                                                                                                                                                                                     |     |
| 37 |                                             |                      |                                                                                                                                                                                                                                                                                     |     |
| 38 |                                             |                      |                                                                                                                                                                                                                                                                                     |     |
| 39 |                                             |                      |                                                                                                                                                                                                                                                                                     |     |

40 The SPIRIT checklist is distributed under the terms of the Creative Commons Attribution License CC-BY-ND  
 41 3.0. This checklist was completed on 08. May 2020 using <https://www.goodreports.org/>, a tool made by the  
 42 [EQUATOR Network](#) in collaboration with [Penelope.ai](#)  
 43  
 44  
 45  
 46  
 47  
 48  
 49  
 50  
 51  
 52  
 53  
 54  
 55  
 56  
 57  
 58  
 59  
 60

# BMJ Open

**Guided relaxation-based virtual reality versus distraction-based virtual reality or passive control for postoperative pain management in children and adolescents undergoing Nuss repair of pectus excavatum: protocol for a prospective, randomized, controlled trial (FOREVR Peds trial)**

|                                 |                                                                                                                                                                                                                                                                                                                                                                                                                                                                                                                                                                                                                                                                                                                                                                                                                                                                                                                    |
|---------------------------------|--------------------------------------------------------------------------------------------------------------------------------------------------------------------------------------------------------------------------------------------------------------------------------------------------------------------------------------------------------------------------------------------------------------------------------------------------------------------------------------------------------------------------------------------------------------------------------------------------------------------------------------------------------------------------------------------------------------------------------------------------------------------------------------------------------------------------------------------------------------------------------------------------------------------|
| Journal:                        | <i>BMJ Open</i>                                                                                                                                                                                                                                                                                                                                                                                                                                                                                                                                                                                                                                                                                                                                                                                                                                                                                                    |
| Manuscript ID                   | bmjopen-2020-040295.R2                                                                                                                                                                                                                                                                                                                                                                                                                                                                                                                                                                                                                                                                                                                                                                                                                                                                                             |
| Article Type:                   | Protocol                                                                                                                                                                                                                                                                                                                                                                                                                                                                                                                                                                                                                                                                                                                                                                                                                                                                                                           |
| Date Submitted by the Author:   | 16-Nov-2020                                                                                                                                                                                                                                                                                                                                                                                                                                                                                                                                                                                                                                                                                                                                                                                                                                                                                                        |
| Complete List of Authors:       | Olbrecht, Vanessa A. ; Cincinnati Children's Hospital Medical Center, Anesthesia<br>Williams, Sara; Cincinnati Children's Hospital Medical Center, Behavioral Medicine and Clinical Psychology<br>O'Connor, Keith; Cincinnati Children's Hospital Medical Center, Anesthesia<br>Boehmer, Chloe; Cincinnati Children's Hospital Medical Center, Anesthesia<br>Marchant, Gilbert; Cincinnati Children's Hospital Medical Center, Anesthesiology<br>Glynn, Susan; Cincinnati Children's Hospital Medical Center, Anesthesia<br>Geisler, Kristie; Cincinnati Children's Hospital Medical Center, Anesthesia<br>Ding, Lili; Cincinnati Children's Hospital Medical Center, Biostatistics and Epidemiology<br>Yang, Gang; Cincinnati Children's Hospital Medical Center, Biostatistics and Epidemiology<br>King, Christopher; Cincinnati Children's Hospital Medical Center, Behavioral Medicine and Clinical Psychology |
| <b>Primary Subject Heading</b>: | Anaesthesia                                                                                                                                                                                                                                                                                                                                                                                                                                                                                                                                                                                                                                                                                                                                                                                                                                                                                                        |
| Secondary Subject Heading:      | Complementary medicine, Paediatrics                                                                                                                                                                                                                                                                                                                                                                                                                                                                                                                                                                                                                                                                                                                                                                                                                                                                                |
| Keywords:                       | Pain management < ANAESTHETICS, Paediatric anaesthesia < ANAESTHETICS, COMPLEMENTARY MEDICINE, Paediatric thoracic surgery < PAEDIATRIC SURGERY, Clinical trials < THERAPEUTICS                                                                                                                                                                                                                                                                                                                                                                                                                                                                                                                                                                                                                                                                                                                                    |
|                                 |                                                                                                                                                                                                                                                                                                                                                                                                                                                                                                                                                                                                                                                                                                                                                                                                                                                                                                                    |

SCHOLARONE™  
Manuscripts



I, the Submitting Author has the right to grant and does grant on behalf of all authors of the Work (as defined in the below author licence), an exclusive licence and/or a non-exclusive licence for contributions from authors who are: i) UK Crown employees; ii) where BMJ has agreed a CC-BY licence shall apply, and/or iii) in accordance with the terms applicable for US Federal Government officers or employees acting as part of their official duties; on a worldwide, perpetual, irrevocable, royalty-free basis to BMJ Publishing Group Ltd ("BMJ") its licensees and where the relevant Journal is co-owned by BMJ to the co-owners of the Journal, to publish the Work in this journal and any other BMJ products and to exploit all rights, as set out in our [licence](#).

The Submitting Author accepts and understands that any supply made under these terms is made by BMJ to the Submitting Author unless you are acting as an employee on behalf of your employer or a postgraduate student of an affiliated institution which is paying any applicable article publishing charge ("APC") for Open Access articles. Where the Submitting Author wishes to make the Work available on an Open Access basis (and intends to pay the relevant APC), the terms of reuse of such Open Access shall be governed by a Creative Commons licence – details of these licences and which [Creative Commons](#) licence will apply to this Work are set out in our licence referred to above.

Other than as permitted in any relevant BMJ Author's Self Archiving Policies, I confirm this Work has not been accepted for publication elsewhere, is not being considered for publication elsewhere and does not duplicate material already published. I confirm all authors consent to publication of this Work and authorise the granting of this licence.

1  
2  
3 **Guided relaxation-based virtual reality versus distraction-based virtual reality or passive**  
4 **control for postoperative pain management in children and adolescents undergoing Nuss**  
5 **repair of pectus excavatum: protocol for a prospective, randomized, controlled trial**  
6 **(FOREVR Peds trial)**  
7  
8

9  
10 Vanessa A. Olbrecht, MD, MBA,<sup>\*1,2,3,5</sup> Sara E. Williams, PhD,<sup>1,4,5</sup> Keith T. O'Connor, BS,<sup>2,3</sup>  
11 Chloe O. Boehmer,<sup>2</sup> Gilbert W. Marchant, BS,<sup>2,3</sup> Susan M. Glynn BA, CCRP,<sup>2</sup> Kristie J. Geisler,  
12 BS, CCRP,<sup>2</sup> Lili Ding, PhD,<sup>3,5,6</sup> Gang Yang, PhD,<sup>3,5,6</sup> Christopher D. King, PhD<sup>1,4,5</sup>  
13  
14  
15

16 **Affiliations:**

17  
18 <sup>1</sup>*Center for Understanding Pediatric Pain (CUPP), Cincinnati Children's, Cincinnati, Ohio,*  
19 *USA.*

20  
21 <sup>2</sup>*Department of Anesthesiology, Cincinnati Children's Hospital Medical Center, Cincinnati,*  
22 *Ohio, USA.*

23  
24 <sup>3</sup>*University of Cincinnati College of Medicine, Cincinnati, Ohio, USA.*

25  
26 <sup>4</sup>*Division of Behavioral Medicine and Clinical Psychology, Cincinnati Children's, Cincinnati,*  
*Ohio, USA.*

27  
28 <sup>5</sup>*Department of Pediatrics, University of Cincinnati, College of Medicine, Cincinnati, Ohio,*  
29 *USA.*

30  
31 <sup>6</sup>*Division of Biostatistics and Epidemiology, Cincinnati Children's Hospital Medical Center*  
32 *Cincinnati OH 45229, USA.*  
33  
34

35 **Corresponding Author:**

36  
37 Vanessa A. Olbrecht, MD, MBA  
38 Cincinnati Children's Hospital Medical Center  
39 Department of Anesthesiology  
40 3333 Burnet Avenue, MLC 2001  
41 Cincinnati, OH 45229, USA  
42 Telephone: (513) 213-1107  
43 Fax: (513) 636-7337  
44 Email: [Vanessa.Olbrecht@cchmc.org](mailto:Vanessa.Olbrecht@cchmc.org)  
45  
46  
47

48 **Key words:** Postoperative pain, virtual reality (VR), guided relaxation-based virtual reality (VR-  
49 GR), pediatric anesthesia, pediatric pain  
50  
51  
52

53 **Word Count:** 3,963 words (excluding title page, abstract, references, figures and tables)  
54  
55  
56  
57  
58  
59  
60

## ABSTRACT

**Introduction** Virtual reality (VR) offers an innovative method to deliver nonpharmacological pain management. Distraction-based VR (VR-D) using immersive games to redirect attention has shown short-term pain reductions in various settings. To create lasting pain reduction, VR-based strategies must go beyond distraction. Guided relaxation-based VR (VR-GR) integrates pain-relieving mind-body based guided relaxation with VR, a novel therapy delivery mechanism. The primary aim of this study is to assess the impact of daily VR-GR, VR-D, and 360 video (passive control) on pain intensity. We will also assess the impact of these interventions on pain unpleasantness, anxiety, and opioid and benzodiazepine consumption. The secondary aim of this study will assess the impact of psychological factors (anxiety sensitivity, pain catastrophizing) on pain following VR.

**Methods and analysis** This is a single center, prospective, randomized, clinical trial. Ninety children/adolescents, ages 8 to 18 years, presenting for Nuss repair of pectus excavatum will be randomized to 1 of 3 study arms (VR-GR, VR-D, 360 video). Patients will use the Starlight Xperience (Google Daydream) VR suite for 10-minutes. Patients randomized to VR-GR (n=30) will engage in guided relaxation/mindfulness with the Aurora application. Patients randomized to VR-D (n=30) will play 1 of 3 distraction-based games, and those randomized to the 360 video (n=30) will watch the Aurora application without audio instructions or sound. Primary outcome is pain intensity. Secondary outcomes include pain unpleasantness, anxiety, and opioid and benzodiazepine consumption.

**Ethics and dissemination** This study follows SPIRIT guidelines. The protocol was approved by the Cincinnati Children's Hospital Medical Center Institutional Review Board. Patient recruitment began in July 2020. Written informed consent will be obtained for all participants. All information acquired will be disseminated via scientific meetings and published in peer-reviewed journals.

**Trial registration number** ClinicalTrials.gov [NCT04351776](https://clinicaltrials.gov/ct2/show/study/NCT04351776), registered April 3, 2020.



## ARTICLE SUMMARY

### *Strengths and limitations of this study*

- This is a prospective, randomized clinical trial, which provides the best clinical evidence and support for VR as an intervention.
- This is the first study examining the use of VR-based interventions in a postoperative pediatric population.
- Due to the nature of the study, it cannot be blinded.
- One limitation is the specific patient population being studied: children and adolescents between the ages of 8 and 18 years undergoing Nuss repair of pectus excavatum. Patient selection may limit generalizability of findings.
- A second limitation is the conduction of the study at an academic, tertiary care, pediatric hospital; as such, these results may not be generalizable to patients in other clinical settings.

## INTRODUCTION

### Background and rationale

Children and adolescents with pain are at risk of opioid abuse,<sup>1</sup> and many are initially exposed to narcotics prescribed to treat pain.<sup>2</sup> More specifically, children and adolescents are at risk of persistent pain and opioid use after surgery, with the surgical period being a significant risk for the initial opioid exposure in children.<sup>3-5</sup> Over 25% of patients with chronic pain who are on opioids were first exposed after surgery.<sup>6</sup> Even short-term opioid use after surgery places a patient at risk of long-term abuse. Just 5 days of opioid use can increase the risk of persistent use, and use for more than 8 days may increase the risk to as much as 13.5%.<sup>7</sup> While this risk is well documented in adults, few studies address this topic in children.<sup>8</sup> A recent retrospective study of opioid-naïve surgical patients found persistent opioid use in 4.8% of adolescents versus 0.1% in a matched, nonsurgical cohort, equating to a 50-fold increase in risk.<sup>3</sup>

Pectus excavatum, a depression of the anterior chest wall, is often corrected via the Nuss repair, a minimally invasive procedure in which a bar(s) is inserted beneath the sternum and flipped to elevate the chest.<sup>9</sup> Although minimally invasive, this procedure is associated with significant postoperative pain.<sup>10</sup> Despite efforts at multimodal therapy, the percentage of patients experiencing severe pain after surgery has not changed over the last 20 years.<sup>11, 12</sup> Existing pediatric studies have identified an approximately 20% incidence of persistent postsurgical pain beyond what is expected from surgery alone.<sup>13</sup> While 80% of these patients recover within about one month, 20% maintain a reduced quality of life secondary to persistent pain.<sup>13</sup> While the consequences of opioids exposure are significant, poorly controlled postsurgical pain is also problematic. Ineffective postoperative pain management is associated with increased morbidity, poorer physical functioning, longer recover, and higher cost.<sup>14, 15</sup> Multimodal pain management requires the exploration of safe, effective, nonpharmacological strategies that reduce pain and opioid consumption.<sup>16</sup> Nonpharmacological methods to treat pain can both improve analgesia after surgery and decrease opioid exposure, a risk factor for future addiction.<sup>1</sup>

Virtual reality (VR) may offer a safe, innovative, nonpharmacological tool with the potential to decrease pain and medication consumption. VR provides an immersive, multisensory, three-dimensional (3D) environment that enables individuals to have modified experiences of reality

1  
2  
3 by creating a sense of “presence,” making it an excellent candidate for distraction-based  
4 therapy.<sup>17</sup> Distraction-based virtual reality (VR-D) is hypothesized to reduce pain through the  
5 redirection of attention augmented by the immersion created by VR.<sup>18, 19</sup> VR-D has been used  
6 during painful procedures, the postoperative period, and labor to help decrease pain by  
7 redirecting attention.<sup>20-32</sup> These studies show transient reductions in pain insufficient to treat  
8 prolonged acute pain experiences,<sup>33, 34</sup> including postoperative pain, suggesting that redirection  
9 of attention alone is not adequate to help manage pain that is more sustained. Comparatively,  
10 nonpharmacological alternatives that utilize mind-body based therapies delivered in a traditional  
11 format, like relaxation and slow breathing, are able to decrease anxiety and pain in children  
12 undergoing surgery.<sup>35</sup> Unlike distraction, slow breathing during relaxation results in increased  
13 heart rate variability,<sup>36</sup> which activates the parasympathetic nervous system, resulting in pain  
14 reduction.<sup>37, 38</sup> However, despite their efficacy, these therapies are fraught with challenges, such  
15 as barriers to accessing care, high cost, need for multiple visits, and provider shortages.<sup>39</sup> VR can  
16 increase accessibility to these mind-body therapies and enhance acceptability, motivation, and  
17 adherence in pediatric patients compared to methods without VR.<sup>40</sup> Combining strategies of  
18 traditional mind-body therapies, like relaxation and slow breathing, with the immersive nature of  
19 VR opens new possibilities for multimodal analgesia in the pediatric population and has the  
20 potential to simultaneously minimize acute postoperative pain and opioid consumption. Guided  
21 relaxation-based VR (VR-GR) is a promising mechanism to deliver mind-body based therapy,  
22 improve postoperative pain control, and avoid challenges common with mind-body therapies  
23 delivered in the traditional format.

24  
25  
26  
27  
28  
29  
30  
31  
32  
33  
34  
35  
36  
37  
38  
39  
40  
41 We have designed a prospective, randomized, clinical trial to assess the efficacy of VR-GR to  
42 decrease pain, anxiety, and opioid consumption in children and adolescents undergoing Nuss  
43 repair of pectus excavatum and hypothesize that VR-GR will be more effective at reducing pain,  
44 anxiety, and opioid consumption in this population than VR-D or a passive control.

### 45 46 47 48 49 **Objectives**

50  
51 The primary objective of this study is to determine the impact of VR-GR on pain intensity in  
52 children and adolescents undergoing Nuss repair of pectus excavatum compared to VR-D and  
53 360 video both during the hospitalization (primary) and up to one month following discharge  
54 (secondary). We will also assess the impact of VR-GR on pain unpleasantness, anxiety, and  
55  
56  
57  
58  
59  
60

1  
2  
3 opioid and benzodiazepine consumption compared to VR-D and 360 video. The secondary  
4 objective of this study is to determine the role of anxiety sensitivity and pain catastrophizing on  
5 changes in pain and anxiety following VR-GR, VR-D, and 360 video both during hospitalization  
6 and 1-month post discharge in this same patient population using standard questionnaires.  
7  
8  
9

## 10 11 12 **METHODS AND ANALYSIS**

13 The FOREVR Peds study is a single center, prospective, unblinded, randomized clinical trial  
14 with three groups: VR-GR, VR-D or 360 video. A daily, 10-minute session of these respective  
15 interventions will be administered to children and adolescents between the age of 8 and 18 years  
16 undergoing Nuss repair of pectus excavatum for up to 3 days after surgery. The primary  
17 objective is to determine the impact of VR-GR on pain intensity compared to VR-D and 360  
18 video during hospitalization. Patient recruitment began in July 2020 and we anticipate a total  
19 study duration of two years. This study protocol complies with the SPIRIT Statement as well as  
20 the CONSORT Statement (Figure 1). The study was registered at ClinicalTrials.gov  
21 (NCT04351776) on April 3, 2020 and all trial registration data can be found on the  
22 [ClinicalTrials.gov](https://clinicaltrials.gov) website.  
23  
24  
25  
26  
27  
28  
29  
30

### 31 32 **Study setting**

33 Cincinnati Children's Hospital Medical Center (CCHMC), a tertiary care, academic, pediatric  
34 hospital.  
35  
36  
37

### 38 39 **Study design**

40 This is a single-center, prospective, randomized clinical trial of children and adolescents with  
41 acute postoperative pain following Nuss repair of pectus excavatum to assess the impact of  
42 multiple VR-GR sessions on pain and medication utilization in relation to patient anxiety and  
43 pain catastrophizing. Figure 1 summarizes the study design. We will assess the acute and long-  
44 term impact of each intervention on changes in pain intensity, pain unpleasantness, anxiety, and  
45 opioid and benzodiazepine consumption during hospitalization and following discharge, where  
46 acute impact on pain intensity is the primary focus. Figure 2 summarizes this experimental  
47 design. All patients are managed postoperatively via the pectus surgery pain management  
48 protocol, which standardizes all non-controlled medications received by patients. Patients  
49  
50  
51  
52  
53  
54  
55  
56  
57  
58  
59  
60

1  
2  
3 enrolled in this study will be managed per this protocol (standard care) and will receive the  
4 additional intervention of VR or 360 video.  
5  
6

## 7 **Outcome measures**

### 8 *Primary outcome:*

9  
10 Our primary outcome is pain intensity following daily VR-GR, VR-D, and 360 video in our  
11 population during hospitalization.  
12  
13

### 14 *Secondary outcomes:*

15  
16 Our secondary outcomes are pain unpleasantness, anxiety, and opioid and benzodiazepine  
17 consumption following daily VR-GR, VR-D, and 360 video in our population during  
18 hospitalization and up to 1-month following discharge. We will also assess the impact of pain  
19 catastrophizing and anxiety sensitivity on these outcomes.  
20  
21  
22  
23

## 24 **Participants**

25  
26 We will recruit 90 adolescents (30 per group) between the age of 8 and 18 years undergoing  
27 Nuss repair of pectus excavatum. Eligibility criteria have been chosen to correspond with our  
28 prior work and result in a population with whom our group has substantial experience.  
29  
30  
31

### 32 *Inclusion Criteria:*

33  
34 Patients will be included based on the following criteria: (a) Between the ages of 8 and 18 years;  
35 (b) Able to read, understand, and speak English; (c) Scheduled to undergo Nuss repair of pectus  
36 excavatum at CCHMC.  
37  
38

### 39 *Exclusion criteria:*

40  
41 Patients will be excluded for the following reasons: (a) Patients < 8 or > 18 years of age at the  
42 time study enrollment; (b) History of significant developmental delay, underlying psychiatric  
43 disease associated with delusions or hallucinations, or significant neurological conditions,  
44 including epilepsy, severe motion sickness, or active nausea/vomiting; (c) Conditions that  
45 preclude application and use of the VR device, including craniofacial abnormalities.  
46  
47  
48  
49  
50

## 51 **Randomization**

52  
53 Eligible patients will be randomly assigned in a 1:1:1 fashion to the following three study  
54 groups: VR-GR, VR-D, and 360 video (passive control) following study enrollment based on  
55 subject number. The randomization scheme will be generated using an online randomizing tool  
56  
57  
58  
59  
60

1  
2  
3 ([www.randomizer.org](http://www.randomizer.org)) to assign patient study numbers into the 1 of 3 groups. The randomization  
4 scheme will be stored in our REDCap database (<https://www.project-redcap.org/>), a secure web  
5 application for building and maintaining secure databases and surveys. We anticipate that  
6 randomization will allow for equal distribution of demographic characteristics among the three  
7 groups. Our clinical research coordinator is responsible for assigning patients to each study  
8 group based on this randomization scheme.  
9  
10  
11  
12  
13

## 14 **Interventions**

15 All patients will use the VR device and software from the Starlight Children's Foundation, the  
16 Starlight Xperience device (Google Daydream). This VR device is commercially available and is  
17 not FDA regulated. The Google Daydream is an all-in-one headset, so no additional hardware is  
18 required to deliver the VR experience. A set of headphones, included with the headset, is used to  
19 deliver audio instructions and sound, creating a fully immersive experience. Patients will be  
20 visited daily to undergo a single, 10-minute session with the VR headset for up to 3 days after  
21 surgery. The 10-minute daily session is based on a standard time duration and frequency for  
22 mind-body therapies.<sup>38, 41</sup> We will work with the care team to standardize the timing of the daily  
23 study visit for all patients.  
24  
25  
26  
27  
28  
29  
30  
31  
32  
33

### 34 *VR-GR (intervention)*

35 Patients randomized to the VR-GR group will use the Aurora application to receive  
36 relaxation/mindfulness content. This application acts as an escape for patients as well as a tool to  
37 teach slow breathing and relaxation techniques. Patients are transported to an alpine meadow  
38 with dynamic daytime, and later, nighttime scenery. With the help of a 10-minute narrative,  
39 participants are guided to sync their breathing with their surroundings: the rise and fall of a  
40 floating butterfly during the day and the movement of the northern lights in the sky at night.  
41  
42  
43  
44  
45  
46

### 47 *VR-D (active control):*

48 Patients randomized to the VR-D group will choose 1 of 3 distraction-based games: Space Pups,  
49 Pebbles the Penguin, or Wonderglade. Each provides a similar distraction-based experience for  
50 the user. 1) *Space Pups*: user controls an astronaut space puppy and works to collect treats to the  
51 beat of the music. 2) *Pebbles the Penguin*: user controls a penguin sliding down a mountain and  
52  
53  
54  
55  
56  
57  
58  
59  
60

works to collect shiny pebbles to unlock new power-ups. 3) *Wonderglade*: 5 different carnival-themed mini-games like basketball, miniature golf, and racing.

### *360 video (passive control):*

Patients will view a 360 video of a nature scene like the Aurora application but will not receive a guided tutorial on how to relax and sync their breathing with the application. They will also not receive any audio instructions or sound, decreasing the fully immersive experience.

### **Patient recruitment**

On average, 125 to 150 Nuss repairs are performed at CCHMC annually. We plan to enroll a total of 90 patients. Patients scheduled to undergo Nuss repair of pectus excavatum will be recruited continuously throughout the course of the study until enrollment targets are met. We anticipate recruiting two patients per week given our surgical volume. We will receive notification of all Nuss repair surgery bookings by the surgery schedulers to identify possible participants, allowing for eligible patients to be identified greater than 1 week prior to surgery. The operating room schedule as well as the surgical patient list will be screened for eligible patients based upon age criteria. Patients meeting age criteria will undergo screening of their available electronic medical record to assess study eligibility. Eligible patients will be approached prior to surgery. If patients wish to participate, appropriate consent (and assent for patients  $\geq 11$  years of age) will be obtained and eligibility criteria will be verified. Patients will be block randomized (1:1:1 ratio) to VR-GR (intervention), VR-D (active control), and 360 video (passive control). A randomization scheme will be created prior to the start of the study using an online tool ([www.randomizer.org](http://www.randomizer.org)) and patients will be assigned to a group based upon study number. Patients will receive a tutorial on the VR device at the time of enrollment. Demographic, health information, and medical history will be recorded and documented in the REDCap database. Patients will be offered a small stipend for participation to help increase recruitment and adherence. Our clinical research coordinator is responsible for enrolling patients.

### **Study visits**

Patients will be visited daily to undergo a single, 10-minute session. Every effort will be made to ensure consistency in timing of the visits for all patients. Prior to surgery, patients will complete two validated questionnaires to assess baseline trait measures: the Pain Catastrophizing Scale for

1  
2  
3 Children (PCS-C)<sup>42</sup> and the Child Anxiety Sensitivity Index (CASI).<sup>43</sup> They will also complete a  
4 health history questionnaire and a baseline pain intensity, pain unpleasantness, and anxiety rating  
5 will be obtained using the Numerical Rating Scale (NRS).<sup>44, 45</sup> Pain intensity, pain  
6 unpleasantness, and anxiety ratings will be repeated immediately, 15 minutes, and 30 minutes  
7 following session completion. Patients typically remain in the hospital for 3 to 4 days following  
8 Nuss repair. During their inpatient stay, participants will have daily study visits, repeating the  
9 same process as the first session; patients will not repeat the PCS-C or CASI surveys. At the last  
10 visit, patients will be given a satisfaction survey to gather qualitative feedback about the VR  
11 experience.  
12  
13  
14  
15  
16  
17  
18  
19

### 20 **Data collection**

21 For each eligible participant, data will be collected from patient history/interview and the  
22 electronic medical record in a standardized case report form in the REDCap system by a clinical  
23 research coordinator (CRC) or student who maintain CITI training in accordance with our local  
24 institutional review board (IRB) under the direct supervision of the principal investigator (PI).  
25 Total opioid and benzodiazepine usage will be collected from the electronic medical record for  
26 24 hours after each session in mg/kg/day to account for patient weight. All medication  
27 consumption will be collected for assessment of non-opioid analgesics and to ensure consistency  
28 with the pectus pain management protocol. To assess pain intensity and unpleasantness after  
29 hospital discharge, patients will use a daily log to record pain scores using the NRS for one  
30 month. We will use eCAP (electronic capture pill dispenser,  
31 <https://www.informationmediary.com/nfc-smart-packaging-devices/ecap-smart-pill-bottle/>) to  
32 document medication consumption. Weekly reminders will be sent using Twilio, and telephone  
33 follow-up will be done at two weeks and one month to help improve patient adherence.  
34 Prescription cross-verification will be done using controlled substance reporting databases for  
35 Ohio, Kentucky, and Indiana (OARRS, KASPER, and INSPECT, respectively) to verify data  
36 collected from patient logs and eCAP.  
37  
38  
39  
40  
41  
42  
43  
44  
45  
46  
47  
48  
49

### 50 **Measurements**

51 a) Pain intensity, pain unpleasantness, and anxiety ratings will be assessed using the NRS.<sup>44, 45</sup> b)  
52 Pain catastrophizing will be assessed using PCS-C.<sup>42</sup> c) Anxiety sensitivity will be assessed  
53 using CASI.<sup>43</sup> d) Total opioid and benzodiazepine usage will be collected from EPIC for 24  
54  
55  
56  
57  
58  
59  
60



1  
2  
3 hours after each session and up to 1-month post-hospital discharge via eCAP. Opioid  
4 consumption will be converted to morphine equivalents in mg/kg/day. All medication  
5 consumption will be collected for assessment of non-opioid analgesics and converted to  
6 milligram per kilogram per day. Table 1 summarizes the measurements used in the study.  
7  
8  
9

### 10 **Sample size calculation**

11 Sample size calculation is based on preliminary data assessing the impact of VR-D to affect  
12 changes in pain intensity in children and adolescents following surgery (unpublished).  
13

14 Preliminary data showed that the average change in pain intensity across time was -1, with  
15 standard deviation (SD) 1.2 and correlation between measurement pairs of 0.88. Assuming  
16 similar results in the passive control group, sample size of 30/group will have 80% power to  
17 detect differences in mean changes of one between VR-GR and the two control groups. We  
18 expect a difference of  $\geq 1$  between VR-GR and VR-D to emerge with multiple sessions as  
19 proposed with this study. Significance ( $\alpha$ ) is 0.025 to control for two comparisons. We will  
20 recruit 90 patients, 30 per group.  
21  
22  
23  
24  
25  
26  
27

### 28 **Statistical analysis**

29 Statistical analysis will be done with SAS 9.4 (Cary, NC). Descriptive statistics will be  
30 calculated and summarized (*continuous*: mean  $\pm$  SD; *categorical*: frequency %). Prior to  
31 analysis, assumption of normality will be assessed for continuous variables and corrected using  
32 log transformation when appropriate. All statistical tests will be two-sided. Bonferroni correction  
33 will be made as appropriate for comparisons. Change from baseline for primary and secondary  
34 outcomes will be tested for normality and deviation from zero using paired tests (t-test or signed-  
35 rank, as appropriate) at individual time points after interventions. Change from baseline will be  
36 compared between groups using two-sample t-test or Wilcoxon rank-sum test (between two  
37 groups, i.e., VR-GR vs. VR-D and VR-GR vs. 360 video) and ANOVA or Kruskal-Wallis test  
38 (across three groups) at individual time points after the sessions.  
39  
40  
41  
42  
43  
44  
45  
46  
47  
48

49 Primary analysis for the primary outcome, pain intensity during hospitalization, will be  
50 conducted on the intent to treat population, which is defined as all patients who were randomized  
51 and received any intervention. All patients who were randomized will be included in analysis  
52 and analyzed according to the group to which they were originally assigned, regardless of the  
53  
54  
55  
56  
57  
58  
59  
60

1  
2  
3 treatment (if any) they received. The primary analysis will be mixed effects models for repeated  
4 measures with baseline value, intervention group, time (0, 15, 30 minutes after intervention), and  
5 group and time interaction to test the hypothesis that VR-GR reduces pain more than controls.  
6  
7 Similar analysis will be run for secondary outcomes including anxiety, and opioid and  
8 benzodiazepine consumption. Potential covariates (such as age and sex) will be tested for  
9 association with the outcomes using univariate approaches and included in the mixed effect  
10 models if significant. Pain and opioid use 1-month post-discharge will be compared between  
11 intervention groups using ANOVA (with adjustment of possible covariates) or Kruskal-Wallis  
12 test, as appropriate, based on data distribution.  
13  
14  
15  
16  
17  
18  
19

20 Anxiety sensitivity (or pain catastrophizing) will be dichotomized using the sample median (or  
21 tertiles depending on distribution) and its effect on response to intervention (change in pain  
22 intensity from baseline) will be tested using the two-sample t-test or Wilcoxon rank-sum test, as  
23 appropriate at individual time points (0, 15, 30 minutes) after intervention. Mixed effects models  
24 for repeated measures (change in pain intensity from baseline) with high or low anxiety  
25 sensitivity (or pain catastrophizing) group, time (0, 15, 30 minutes after intervention), and group  
26 and time interaction will be used to test the hypothesis that patients with greater anxiety  
27 sensitivity and pain catastrophizing will have a larger reduction in pain vs. patients with less  
28 anxiety sensitivity and pain catastrophizing. Assuming the same SD and correlation between  
29 pain intensity measurement pairs from the primary power analysis, sample size of 15/group (high  
30 vs. low anxiety or pain catastrophizing dichotomized at median for the VR-GR group) will have  
31 80% power to detect differences in mean changes of pain intensity of 1.3 between the two  
32 groups, with  $\alpha=0.05$ . The same analysis will be repeated for pain unpleasantness and anxiety.  
33  
34  
35  
36  
37  
38  
39  
40  
41  
42

43 We will make every effort to ensure that at least one daily VR session will be completed for each  
44 study participant and that all data extraction will be complete to avoid missing data. We will  
45 assess missing data for all study variables. Chart review for missing data on demographics,  
46 medical history, etc. will be performed when feasible. Missing outcome data will be statistically  
47 imputed using multiple imputation, and a sensitivity analysis will be conducted to compare  
48 analysis results with and without imputation. We do not anticipate that age will have an impact  
49 on our findings. However, we will stratify by age, if necessary, in the analysis (age 8-13 years,  
50 14-18 years).  
51  
52  
53  
54  
55  
56  
57  
58  
59  
60

## **ETHICS SAFETY AND DISSEMINATION**

### **Ethics**

This study is being conducted in accordance with the rules and regulations applicable to the conduct of ethical research and this study protocol has been approved by the IRB at CCHMC (IRB #2019-1090). This protocol includes clear delineation of the protocol version identifier and date on each protocol amendment submitted to the IRB; clear delineation of plans for data entry, coding, security, and storage; clear delineation of mechanisms to ensure patient confidentiality, including how personal information will be collected, shared, and maintained in order to protect confidentiality before, during, and after the trial; statements regarding who has access to data collected during this study; and a model consent form and other related documentation given to participants and/or guardians. We do not anticipate any major protocol modifications during the duration of this study.

### **Safety**

It is anticipated that the risk to participants in this study is minimal. The specific VR device used in this study is a minimal risk device, and because it is considered a relaxation device by the FDA, it is not regulated as a clinical device. Risks specific to VR are minimal, with the greatest risk being motion sickness and/or nausea while the headset is in place.<sup>46</sup> There is a theoretical risk of inducing seizures (0.025% in a pediatric data set supplied by a similar Samsung device). We will minimize these risks by excluding patients with a history of significant neurological disorders, including epilepsy and severe motion sickness/nausea. Patients will also be explicitly instructed to remove the headset should any side effects or discomfort occur. The PI will continually monitor all risks to the participants. Weekly lab meetings will be used to address quality assurance and safety concerns with the study. Research personnel are instructed to inform the PI immediately with any safety concerns or adverse events (AEs). The IRB will also be updated when any serious AEs (SAEs) occur or when mild or moderate AEs determined to be a result from study participation occur. SAEs that are unanticipated, serious, and possibly related to study participation will be reported to the data safety monitoring committee (DSMC), IRB, and any other necessary study regulatory committee. We do not anticipate any SAEs that would require stopping this trial early. Therefore, we do not plan to conduct interim analysis for safety. This consideration will change if SAEs are reported during the study.

1  
2  
3 Although the risk to patients from this clinical trial is low, a DSMC will be utilized to monitor  
4 safety. The DSMC will be composed of three experts (clinical research, pain management, and  
5 digital technology) who are independent of the protocol. The DSMC will report to the IRB. This  
6 protocol is approved by the IRB at CCHMC in compliance with existing regulations and policies  
7 for the conduct of clinical research.  
8  
9  
10  
11

### 12 13 **Dissemination**

14 Unique data will be obtained from this research and will be widely disseminated through  
15 conference presentations at national and international meetings and through publication of  
16 manuscripts in peer-reviewed publications. Participants may receive trial results if interested. All  
17 authors are eligible to participate in dissemination and we do not plan to use professional writers  
18 to disseminate study results.  
19  
20  
21  
22  
23

### 24 **Patient and public involvement**

25 No patients or members of the public were involved in the design, recruitment, or conduct of this  
26 study. Consideration of the burden of the intervention and time required to participate in this  
27 research was assessed during pilot data collection using VR in the acute postoperative pain  
28 population at our institution and information gathered from this pilot study helped guide the  
29 development of this clinical trial. Participants may receive information about study results if they  
30 wish via a letter describing results to participants. We will share access to the full protocol to  
31 requesting individuals/institutions.  
32  
33  
34  
35  
36  
37  
38  
39  
40  
41  
42  
43  
44  
45  
46  
47  
48  
49  
50  
51  
52  
53  
54  
55  
56  
57  
58  
59  
60

## **AUTHOR CONTRIBUTIONS**

VO, SW, and CK contributed to the conception of this idea, the design of the research protocol and study, and the writing of this manuscript. KO, CB, GM, SG, and KJ provided input regarding the design and implementation of the study protocol and procedures. LD and GY contributed to the design of the research protocol and the statistical analysis plan development. All authors revised and modified this manuscript. They will all approve the final version.

## **FUNDING**

This study is supported by an internal CCHMC research grant, Research Innovation/Pilot Funding Program as well as the Anesthesiology Department at CCHMC. Award/grant number not applicable.

## **DATA STATEMENT**

Technical appendix, statistical code, and/or the study dataset will be available to the public following study completion.

## **COMPETING INTERESTS**

The authors have no competing interests to disclose.

## **ACKNOWLEDGEMENTS**

The authors have no acknowledgements to disclose.

## REFERENCES

1. Hudgins JD, Porter JJ, Monuteaux MC, et al. Trends in Opioid Prescribing for Adolescents and Young Adults in Ambulatory Care Settings. *Pediatrics* 2019; 143: 1-9. 2019/05/30. DOI: 10.1542/peds.2018-1578.
2. Johnston L.D. MRA, O'Malley P.M., et al. Key Findings on Adolescent Drug Use. *National Survey Results on Drug Use 1975-2017* 2017.
3. Harbaugh CM, Lee JS, Hu HM, et al. Persistent Opioid Use Among Pediatric Patients After Surgery. *Pediatrics* 2018; 141 2017/12/06. DOI: 10.1542/peds.2017-2439.
4. Chambers RA, Taylor JR and Potenza MN. Developmental neurocircuitry of motivation in adolescence: a critical period of addiction vulnerability. *Am J Psychiatry* 2003; 160: 1041-1052. 2003/06/05. DOI: 10.1176/appi.ajp.160.6.1041.
5. Rabbitts JA and Kain Z. Perioperative Care for Adolescents Undergoing Major Surgery: A Biopsychosocial Conceptual Framework. *Anesthesia and Analgesia* 2019; 129: 1181-1184. DOI: 10.1213/Ane.0000000000004048.
6. Callinan CE, Neuman MD, Lacy KE, et al. The Initiation of Chronic Opioids: A Survey of Chronic Pain Patients. *J Pain* 2017; 18: 360-365. 2016/12/07. DOI: 10.1016/j.jpain.2016.11.001.
7. Shah A, Hayes CJ and Martin BC. Characteristics of Initial Prescription Episodes and Likelihood of Long-Term Opioid Use - United States, 2006-2015. *MMWR Morb Mortal Wkly Rep* 2017; 66: 265-269. 2017/03/17. DOI: 10.15585/mmwr.mm6610a1.
8. Fortier MA, Chou J, Maurer EL, et al. Acute to chronic postoperative pain in children: preliminary findings. *J Pediatr Surg* 2011; 46: 1700-1705. 2011/09/21. DOI: 10.1016/j.jpedsurg.2011.03.074.
9. Kelly RE, Jr., Shamberger RC, Mellins RB, et al. Prospective multicenter study of surgical correction of pectus excavatum: design, perioperative complications, pain, and baseline pulmonary function facilitated by internet-based data collection. *J Am Coll Surg* 2007; 205: 205-216. 2007/07/31. DOI: 10.1016/j.jamcollsurg.2007.03.027.
10. Muhly WT, Beltran RJ, Bielsky A, et al. Perioperative Management and In-Hospital Outcomes After Minimally Invasive Repair of Pectus Excavatum: A Multicenter Registry Report From the Society for Pediatric Anesthesia Improvement Network. *Anesth Analg* 2019; 128: 315-327. 2018/10/23. DOI: 10.1213/ANE.0000000000003829.
11. Groenewald CB, Rabbitts JA, Schroeder DR, et al. Prevalence of moderate-severe pain in hospitalized children. *Paediatr Anaesth* 2012; 22: 661-668. 2012/02/16. DOI: 10.1111/j.1460-9592.2012.03807.x.
12. Kozlowski LJ, Kost-Byerly S, Colantuoni E, et al. Pain prevalence, intensity, assessment and management in a hospitalized pediatric population. *Pain Manag Nurs* 2014; 15: 22-35. 2014/03/08. DOI: 10.1016/j.pmn.2012.04.003.
13. Rabbitts JA, Zhou C, Groenewald CB, et al. Trajectories of postsurgical pain in children: risk factors and impact of late pain recovery on long-term health outcomes after major surgery. *Pain* 2015; 156: 2383-2389. 2015/09/19. DOI: 10.1097/j.pain.0000000000000281.
14. Gan TJ. Poorly controlled postoperative pain: prevalence, consequences, and prevention. *J Pain Res* 2017; 10: 2287-2298. 2017/10/14. DOI: 10.2147/JPR.S144066.
15. Peters ML, Sommer M, de Rijke JM, et al. Somatic and psychologic predictors of long-term unfavorable outcome after surgical intervention. *Ann Surg* 2007; 245: 487-494. 2007/04/17. DOI: 10.1097/01.sla.0000245495.79781.65.
16. Tick H, Nielsen A, Pelletier KR, et al. Evidence-Based Nonpharmacologic Strategies for Comprehensive Pain Care: The Consortium Pain Task Force White Paper. *Explore (NY)* 2018; 14: 177-211. 2018/05/08. DOI: 10.1016/j.explore.2018.02.001.

17. Carrougher GJ, Hoffman HG, Nakamura D, et al. The effect of virtual reality on pain and range of motion in adults with burn injuries. *J Burn Care Res* 2009; 30: 785-791. 2009/08/21. DOI: 10.1097/BCR.0b013e3181b485d3.
18. Tashjian VC, Mosadeghi S, Howard AR, et al. Virtual Reality for Management of Pain in Hospitalized Patients: Results of a Controlled Trial. *JMIR Ment Health* 2017; 4: e9. 2017/03/31. DOI: 10.2196/mental.7387.
19. Spiegel B, Fuller G, Lopez M, et al. Virtual reality for management of pain in hospitalized patients: A randomized comparative effectiveness trial. *PLoS One* 2019; 14: e0219115. 2019/08/15. DOI: 10.1371/journal.pone.0219115.
20. Morris LD, Louw QA and Grimmer-Somers K. The effectiveness of virtual reality on reducing pain and anxiety in burn injury patients: a systematic review. *Clin J Pain* 2009; 25: 815-826. 2009/10/24. DOI: 10.1097/AJP.0b013e3181aaa909.
21. Malloy KM and Milling LS. The effectiveness of virtual reality distraction for pain reduction: a systematic review. *Clin Psychol Rev* 2010; 30: 1011-1018. 2010/08/10. DOI: 10.1016/j.cpr.2010.07.001.
22. Hoffman HG, Doctor JN, Patterson DR, et al. Virtual reality as an adjunctive pain control during burn wound care in adolescent patients. *Pain* 2000; 85: 305-309. 2000/02/29.
23. Li A, Montano Z, Chen VJ, et al. Virtual reality and pain management: current trends and future directions. *Pain Manag* 2011; 1: 147-157. 2011/07/23. DOI: 10.2217/pmt.10.15.
24. Garrett B, Taverner T, Masinde W, et al. A rapid evidence assessment of immersive virtual reality as an adjunct therapy in acute pain management in clinical practice. *Clin J Pain* 2014; 30: 1089-1098. 2014/02/19. DOI: 10.1097/AJP.0000000000000064.
25. Gold JI, Kim SH, Kant AJ, et al. Effectiveness of virtual reality for pediatric pain distraction during i.v. placement. *Cyberpsychol Behav* 2006; 9: 207-212. 2006/04/28. DOI: 10.1089/cpb.2006.9.207.
26. Furman E, Jasinevicius TR, Bissada NF, et al. Virtual reality distraction for pain control during periodontal scaling and root planing procedures. *J Am Dent Assoc* 2009; 140: 1508-1516. 2009/12/04.
27. Gold JI and Mahrer NE. Is Virtual Reality Ready for Prime Time in the Medical Space? A Randomized Control Trial of Pediatric Virtual Reality for Acute Procedural Pain Management. *J Pediatr Psychol* 2018; 43: 266-275. 2017/10/21. DOI: 10.1093/jpepsy/jsx129.
28. Indovina P, Barone D, Gallo L, et al. Virtual Reality as a Distraction Intervention to Relieve Pain and Distress During Medical Procedures: A Comprehensive Literature Review. *Clin J Pain* 2018; 34: 858-877. 2018/02/28. DOI: 10.1097/AJP.0000000000000599.
29. Cacau Lde A, Oliveira GU, Maynard LG, et al. The use of the virtual reality as intervention tool in the postoperative of cardiac surgery. *Rev Bras Cir Cardiovasc* 2013; 28: 281-289. 2013/08/14. DOI: 10.5935/1678-9741.20130039.
30. Mosso-Vazquez JL, Gao K, Wiederhold BK, et al. Virtual reality for pain management in cardiac surgery. *Cyberpsychol Behav Soc Netw* 2014; 17: 371-378. 2014/06/04. DOI: 10.1089/cyber.2014.0198.
31. Frey DP, Bauer ME, Bell CL, et al. Virtual Reality Analgesia in Labor: The VRAIL Pilot Study-A Preliminary Randomized Controlled Trial Suggesting Benefit of Immersive Virtual Reality Analgesia in Unmedicated Laboring Women. *Anesth Analg* 2019; 128: e93-e96. 2019/05/17. DOI: 10.1213/ANE.0000000000003649.
32. JahaniShoorab N, Ebrahimzadeh Zagami S, Nahvi A, et al. The Effect of Virtual Reality on Pain in Primiparity Women during Episiotomy Repair: A Randomize Clinical Trial. *Iran J Med Sci* 2015; 40: 219-224. 2015/05/23.
33. Van Ryckeghem DM, Van Damme S, Eccleston C, et al. The efficacy of attentional distraction and sensory monitoring in chronic pain patients: A meta-analysis. *Clin Psychol Rev* 2018; 59: 16-29. 2017/11/12. DOI: 10.1016/j.cpr.2017.10.008.

- 1  
2  
3 34. Gupta A, Scott K and Dukewich M. Innovative Technology Using Virtual Reality in the Treatment  
4 of Pain: Does It Reduce Pain via Distraction, or Is There More to It? *Pain Med* 2018; 19: 151-159.  
5 2017/10/13. DOI: 10.1093/pm/pnx109.  
6  
7 35. Vagnoli L, Bettini A, Amore E, et al. Relaxation-guided imagery reduces perioperative anxiety and  
8 pain in children: a randomized study. *Eur J Pediatr* 2019; 178: 913-921. 2019/04/05. DOI:  
9 10.1007/s00431-019-03376-x.  
10 36. Zaccaro A, Piarulli A, Laurino M, et al. How Breath-Control Can Change Your Life: A Systematic  
11 Review on Psycho-Physiological Correlates of Slow Breathing. *Front Hum Neurosci* 2018; 12: 353.  
12 2018/09/25. DOI: 10.3389/fnhum.2018.00353.  
13 37. Lehrer PM and Gevirtz R. Heart rate variability biofeedback: how and why does it work? *Front*  
14 *Psychol* 2014; 5: 756. 2014/08/08. DOI: 10.3389/fpsyg.2014.00756.  
15 38. Sowder E, Gevirtz R, Shapiro W, et al. Restoration of vagal tone: a possible mechanism for  
16 functional abdominal pain. *Appl Psychophysiol Biofeedback* 2010; 35: 199-206. 2010/03/17. DOI:  
17 10.1007/s10484-010-9128-8.  
18 39. Peng P, Stinson JN, Choiniere M, et al. Dedicated multidisciplinary pain management centres for  
19 children in Canada: the current status. *Can J Anaesth* 2007; 54: 985-991. 2007/12/07. DOI:  
20 10.1007/BF03016632.  
21 40. Harris K and Reid D. The influence of virtual reality play on children's motivation. *Can J Occup*  
22 *Ther* 2005; 72: 21-29. 2005/02/25. DOI: 10.1177/000841740507200107.  
23 41. Prinsloo GE, Derman WE, Lambert MI, et al. The effect of a single session of short duration  
24 biofeedback-induced deep breathing on measures of heart rate variability during laboratory-induced  
25 cognitive stress: a pilot study. *Appl Psychophysiol Biofeedback* 2013; 38: 81-90. 2013/02/26. DOI:  
26 10.1007/s10484-013-9210-0.  
27 42. Crombez G, Bijttebier P, Eccleston C, et al. The child version of the pain catastrophizing scale  
28 (PCS-C): a preliminary validation. *Pain* 2003; 104: 639-646. 2003/08/21.  
29 43. Silverman WK, Goedhart AW, Barrett P, et al. The facets of anxiety sensitivity represented in the  
30 childhood anxiety sensitivity index: confirmatory analyses of factor models from past studies. *J Abnorm*  
31 *Psychol* 2003; 112: 364-374. 2003/08/29.  
32 44. Tsze DS, von Baeyer CL, Pahalyants V, et al. Validity and Reliability of the Verbal Numerical  
33 Rating Scale for Children Aged 4 to 17 Years With Acute Pain. *Ann Emerg Med* 2018; 71: 691-702 e693.  
34 2017/11/07. DOI: 10.1016/j.annemergmed.2017.09.009.  
35 45. Miro J, Castarlenas E and Huguet A. Evidence for the use of a numerical rating scale to assess the  
36 intensity of pediatric pain. *Eur J Pain* 2009; 13: 1089-1095. 2009/09/04. DOI:  
37 10.1016/j.ejpain.2009.07.002.  
38 46. Nichols S and Patel H. Health and safety implications of virtual reality: a review of empirical  
39 evidence. *Appl Ergon* 2002; 33: 251-271. 2002/08/08.  
40  
41  
42  
43  
44  
45  
46  
47  
48  
49  
50  
51  
52  
53  
54  
55  
56  
57  
58  
59  
60



1  
2  
3 **Table 1. Scales and questionnaires used in the study**  
4

5 **Figure 1. Study flow chart (CONSORT Diagram)**  
6

7  
8 **Figure 2. Experimental design of the study**  
9  
10  
11  
12  
13  
14  
15  
16  
17  
18  
19  
20  
21  
22  
23  
24  
25  
26  
27  
28  
29  
30  
31  
32  
33  
34  
35  
36  
37  
38  
39  
40  
41  
42  
43  
44  
45  
46  
47  
48  
49  
50  
51  
52  
53  
54  
55  
56  
57  
58  
59  
60

For peer review only

Table 1. Scales and questionnaires used in the study

| Table 1. Scales and questionnaires for the study                                                                                                                                                                                                                                                                                                                |
|-----------------------------------------------------------------------------------------------------------------------------------------------------------------------------------------------------------------------------------------------------------------------------------------------------------------------------------------------------------------|
| <b><u>Numerical Rating Scale (NRS)</u></b> . Numerical rating scale where children are asked to give a number on a scale of 0 to 10 of how bad their pain hurts, with 0 being no pain and 10 being the worst pain of their life.                                                                                                                                |
| <b><u>Pain Catastrophizing Scale for Children (PCS-C)</u></b> . Children rate 13 items assessing rumination, magnification, and helplessness related to thoughts about pain. PCS summary scores can be interpreted as low (0 to 14), moderate (15 to 25), and high ( $\geq 26$ ). Internal reliability for our VR-D pilot data was 0.94 (Cronbach's $\alpha$ ). |
| <b><u>Child Anxiety Sensitivity Index (CASI)</u></b> . 18-item self-report tool designed to measure symptoms of anxiety in children and adolescents, with total scores ranging from 18-54. Internal reliability for our VR-D pilot data was 0.84 (Cronbach's $\alpha$ ).                                                                                        |

1  
2  
3  
4  
5  
6  
7  
8  
9  
10  
11  
12  
13  
14  
15  
16  
17  
18  
19  
20  
21  
22  
23  
24  
25  
26  
27  
28  
29  
30  
31  
32  
33  
34  
35  
36  
37  
38  
39  
40  
41  
42  
43  
44  
45  
46  
47  
48  
49  
50  
51  
52  
53  
54  
55  
56  
57  
58  
59  
60



Figure 2. Experimental design of the study

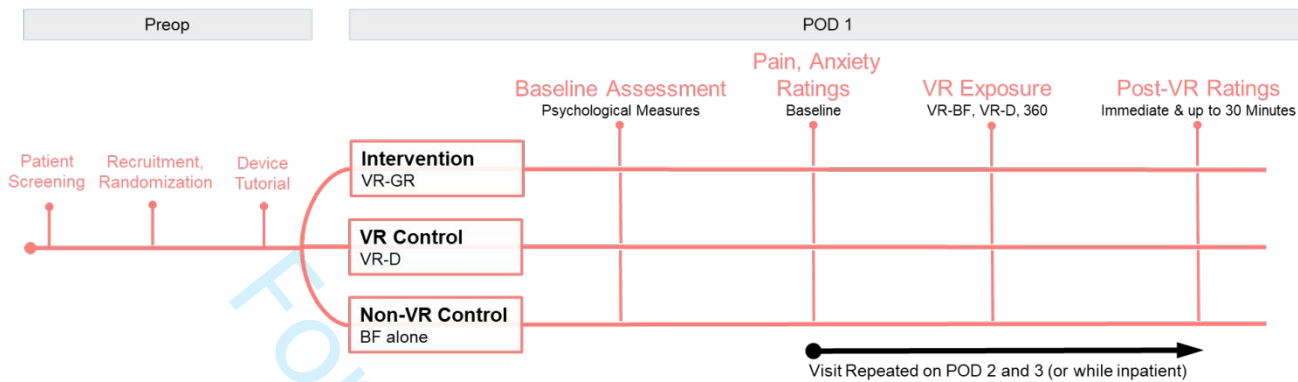

# Reporting checklist for protocol of a clinical trial.

Based on the SPIRIT guidelines.

## Instructions to authors

Complete this checklist by entering the page numbers from your manuscript where readers will find each of the items listed below.

Your article may not currently address all the items on the checklist. Please modify your text to include the missing information. If you are certain that an item does not apply, please write "n/a" and provide a short explanation.

Upload your completed checklist as an extra file when you submit to a journal.

In your methods section, say that you used the SPIRIT reporting guidelines, and cite them as:

Chan A-W, Tetzlaff JM, Altman DG, Laupacis A, Gøtzsche PC, Krleža-Jerić K, Hróbjartsson A, Mann H, Dickersin K, Berlin J, Doré C, Parulekar W, Summerskill W, Groves T, Schulz K, Sox H, Rockhold FW, Rennie D, Moher D. SPIRIT 2013 Statement: Defining standard protocol items for clinical trials. *Ann Intern Med.* 2013;158(3):200-207

|                                             |                     | Reporting Item                                                                                               | Page Number |
|---------------------------------------------|---------------------|--------------------------------------------------------------------------------------------------------------|-------------|
| <b>Administrative information</b>           |                     |                                                                                                              |             |
| Title                                       | <a href="#">#1</a>  | Descriptive title identifying the study design, population, interventions, and, if applicable, trial acronym | 1           |
| Trial registration                          | <a href="#">#2a</a> | Trial identifier and registry name. If not yet registered, name of intended registry                         | 2           |
| Trial registration: data set                | <a href="#">#2b</a> | All items from the World Health Organization Trial Registration Data Set                                     | 2, 6        |
| Protocol version                            | <a href="#">#3</a>  | Date and version identifier                                                                                  | 12          |
| Funding                                     | <a href="#">#4</a>  | Sources and types of financial, material, and other support                                                  | 13          |
| Roles and responsibilities: contributorship | <a href="#">#5a</a> | Names, affiliations, and roles of protocol contributors                                                      | 1, 13       |

|    |                           |                     |                                                                      |      |
|----|---------------------------|---------------------|----------------------------------------------------------------------|------|
| 1  | Roles and                 | <a href="#">#5b</a> | Name and contact information for the trial sponsor                   | n/a  |
| 2  | responsibilities:         |                     |                                                                      |      |
| 3  | sponsor contact           |                     |                                                                      |      |
| 4  | information               |                     |                                                                      |      |
| 5  |                           |                     |                                                                      |      |
| 6  |                           |                     |                                                                      |      |
| 7  |                           |                     |                                                                      |      |
| 8  | Roles and                 | <a href="#">#5c</a> | Role of study sponsor and funders, if any, in study design;          | 13   |
| 9  | responsibilities:         |                     | collection, management, analysis, and interpretation of data;        |      |
| 10 | sponsor and funder        |                     | writing of the report; and the decision to submit the report for     |      |
| 11 |                           |                     | publication, including whether they will have ultimate authority     |      |
| 12 |                           |                     | over any of these activities                                         |      |
| 13 |                           |                     |                                                                      |      |
| 14 |                           |                     |                                                                      |      |
| 15 |                           |                     |                                                                      |      |
| 16 | Roles and                 | <a href="#">#5d</a> | Composition, roles, and responsibilities of the coordinating centre, | n/a  |
| 17 | responsibilities:         |                     | steering committee, endpoint adjudication committee, data            |      |
| 18 | committees                |                     | management team, and other individuals or groups overseeing the      |      |
| 19 |                           |                     | trial, if applicable (see Item 21a for data monitoring committee)    |      |
| 20 |                           |                     |                                                                      |      |
| 21 |                           |                     |                                                                      |      |
| 22 |                           |                     |                                                                      |      |
| 23 | <b>Introduction</b>       |                     |                                                                      |      |
| 24 |                           |                     |                                                                      |      |
| 25 | Background and            | <a href="#">#6a</a> | Description of research question and justification for undertaking   | 4-5  |
| 26 | rationale                 |                     | the trial, including summary of relevant studies (published and      |      |
| 27 |                           |                     | unpublished) examining benefits and harms for each intervention      |      |
| 28 |                           |                     |                                                                      |      |
| 29 |                           |                     |                                                                      |      |
| 30 | Background and            | <a href="#">#6b</a> | Explanation for choice of comparators                                | 4-5  |
| 31 | rationale: choice of      |                     |                                                                      |      |
| 32 | comparators               |                     |                                                                      |      |
| 33 |                           |                     |                                                                      |      |
| 34 |                           |                     |                                                                      |      |
| 35 |                           |                     |                                                                      |      |
| 36 | Objectives                | <a href="#">#7</a>  | Specific objectives or hypotheses                                    | 5    |
| 37 |                           |                     |                                                                      |      |
| 38 | Trial design              | <a href="#">#8</a>  | Description of trial design including type of trial (eg, parallel    | 5, 6 |
| 39 |                           |                     | group, crossover, factorial, single group), allocation ratio, and    |      |
| 40 |                           |                     | framework (eg, superiority, equivalence, non-inferiority,            |      |
| 41 |                           |                     | exploratory)                                                         |      |
| 42 |                           |                     |                                                                      |      |
| 43 |                           |                     |                                                                      |      |
| 44 |                           |                     |                                                                      |      |
| 45 | <b>Methods:</b>           |                     |                                                                      |      |
| 46 | <b>Participants,</b>      |                     |                                                                      |      |
| 47 | <b>interventions, and</b> |                     |                                                                      |      |
| 48 | <b>outcomes</b>           |                     |                                                                      |      |
| 49 |                           |                     |                                                                      |      |
| 50 |                           |                     |                                                                      |      |
| 51 | Study setting             | <a href="#">#9</a>  | Description of study settings (eg, community clinic, academic        | 6    |
| 52 |                           |                     | hospital) and list of countries where data will be collected.        |      |
| 53 |                           |                     | Reference to where list of study sites can be obtained               |      |
| 54 |                           |                     |                                                                      |      |
| 55 |                           |                     |                                                                      |      |
| 56 |                           |                     |                                                                      |      |
| 57 | Eligibility criteria      | <a href="#">#10</a> | Inclusion and exclusion criteria for participants. If applicable,    | 7    |
| 58 |                           |                     | eligibility criteria for study centres and individuals who will      |      |
| 59 |                           |                     |                                                                      |      |
| 60 |                           |                     |                                                                      |      |

perform the interventions (eg, surgeons, psychotherapists)

|    |                              |                      |                                                                       |
|----|------------------------------|----------------------|-----------------------------------------------------------------------|
| 1  |                              |                      |                                                                       |
| 2  |                              |                      |                                                                       |
| 3  | Interventions:               | <a href="#">#11a</a> | Interventions for each group with sufficient detail to allow          |
| 4  | description                  |                      | replication, including how and when they will be administered         |
| 5  |                              |                      |                                                                       |
| 6  | Interventions:               | <a href="#">#11b</a> | Criteria for discontinuing or modifying allocated interventions for a |
| 7  | modifications                |                      | given trial participant (eg, drug dose change in response to harms,   |
| 8  |                              |                      | participant request, or improving / worsening disease)                |
| 9  |                              |                      |                                                                       |
| 10 |                              |                      |                                                                       |
| 11 | Interventions:               | <a href="#">#11c</a> | Strategies to improve adherence to intervention protocols, and any    |
| 12 | adherence                    |                      | procedures for monitoring adherence (eg, drug tablet return;          |
| 13 |                              |                      | laboratory tests)                                                     |
| 14 |                              |                      |                                                                       |
| 15 |                              |                      |                                                                       |
| 16 |                              |                      |                                                                       |
| 17 | Interventions:               | <a href="#">#11d</a> | Relevant concomitant care and interventions that are permitted or     |
| 18 | concomitant care             |                      | prohibited during the trial                                           |
| 19 |                              |                      |                                                                       |
| 20 |                              |                      |                                                                       |
| 21 | Outcomes                     | <a href="#">#12</a>  | Primary, secondary, and other outcomes, including the specific        |
| 22 |                              |                      | measurement variable (eg, systolic blood pressure), analysis metric   |
| 23 |                              |                      | (eg, change from baseline, final value, time to event), method of     |
| 24 |                              |                      | aggregation (eg, median, proportion), and time point for each         |
| 25 |                              |                      | outcome. Explanation of the clinical relevance of chosen efficacy     |
| 26 |                              |                      | and harm outcomes is strongly recommended                             |
| 27 |                              |                      |                                                                       |
| 28 |                              |                      |                                                                       |
| 29 |                              |                      |                                                                       |
| 30 | Participant timeline         | <a href="#">#13</a>  | Time schedule of enrolment, interventions (including any run-ins      |
| 31 |                              |                      | and washouts), assessments, and visits for participants. A            |
| 32 |                              |                      | schematic diagram is highly recommended (see Figure)                  |
| 33 |                              |                      |                                                                       |
| 34 |                              |                      |                                                                       |
| 35 |                              |                      |                                                                       |
| 36 | Sample size                  | <a href="#">#14</a>  | Estimated number of participants needed to achieve study              |
| 37 |                              |                      | objectives and how it was determined, including clinical and          |
| 38 |                              |                      | statistical assumptions supporting any sample size calculations       |
| 39 |                              |                      |                                                                       |
| 40 |                              |                      |                                                                       |
| 41 | Recruitment                  | <a href="#">#15</a>  | Strategies for achieving adequate participant enrolment to reach      |
| 42 |                              |                      | target sample size                                                    |
| 43 |                              |                      |                                                                       |
| 44 |                              |                      |                                                                       |
| 45 | <b>Methods: Assignment</b>   |                      |                                                                       |
| 46 | <b>of interventions (for</b> |                      |                                                                       |
| 47 | <b>controlled trials)</b>    |                      |                                                                       |
| 48 |                              |                      |                                                                       |
| 49 |                              |                      |                                                                       |
| 50 | Allocation: sequence         | <a href="#">#16a</a> | Method of generating the allocation sequence (eg, computer-           |
| 51 | generation                   |                      | generated random numbers), and list of any factors for                |
| 52 |                              |                      | stratification. To reduce predictability of a random sequence,        |
| 53 |                              |                      | details of any planned restriction (eg, blocking) should be provided  |
| 54 |                              |                      | in a separate document that is unavailable to those who enrol         |
| 55 |                              |                      | participants or assign interventions                                  |
| 56 |                              |                      |                                                                       |
| 57 |                              |                      |                                                                       |
| 58 |                              |                      |                                                                       |
| 59 |                              |                      |                                                                       |
| 60 |                              |                      |                                                                       |

|    |                        |                      |                                                                                                                                                                                                                                                                                                                                                                                                              |       |
|----|------------------------|----------------------|--------------------------------------------------------------------------------------------------------------------------------------------------------------------------------------------------------------------------------------------------------------------------------------------------------------------------------------------------------------------------------------------------------------|-------|
| 1  | Allocation concealment | <a href="#">#16b</a> | Mechanism of implementing the allocation sequence (eg, central telephone; sequentially numbered, opaque, sealed envelopes), describing any steps to conceal the sequence until interventions are assigned                                                                                                                                                                                                    | n/a   |
| 2  | mechanism              |                      |                                                                                                                                                                                                                                                                                                                                                                                                              |       |
| 3  |                        |                      |                                                                                                                                                                                                                                                                                                                                                                                                              |       |
| 4  |                        |                      |                                                                                                                                                                                                                                                                                                                                                                                                              |       |
| 5  |                        |                      |                                                                                                                                                                                                                                                                                                                                                                                                              |       |
| 6  |                        |                      |                                                                                                                                                                                                                                                                                                                                                                                                              |       |
| 7  |                        |                      |                                                                                                                                                                                                                                                                                                                                                                                                              |       |
| 8  | Allocation:            | <a href="#">#16c</a> | Who will generate the allocation sequence, who will enrol participants, and who will assign participants to interventions                                                                                                                                                                                                                                                                                    | 9     |
| 9  | implementation         |                      |                                                                                                                                                                                                                                                                                                                                                                                                              |       |
| 10 |                        |                      |                                                                                                                                                                                                                                                                                                                                                                                                              |       |
| 11 | Blinding (masking)     | <a href="#">#17a</a> | Who will be blinded after assignment to interventions (eg, trial participants, care providers, outcome assessors, data analysts), and how                                                                                                                                                                                                                                                                    | n/a   |
| 12 |                        |                      |                                                                                                                                                                                                                                                                                                                                                                                                              |       |
| 13 |                        |                      |                                                                                                                                                                                                                                                                                                                                                                                                              |       |
| 14 |                        |                      |                                                                                                                                                                                                                                                                                                                                                                                                              |       |
| 15 |                        |                      |                                                                                                                                                                                                                                                                                                                                                                                                              |       |
| 16 |                        |                      |                                                                                                                                                                                                                                                                                                                                                                                                              |       |
| 17 | Blinding (masking):    | <a href="#">#17b</a> | If blinded, circumstances under which unblinding is permissible, and procedure for revealing a participant's allocated intervention during the trial                                                                                                                                                                                                                                                         | n/a   |
| 18 | emergency unblinding   |                      |                                                                                                                                                                                                                                                                                                                                                                                                              |       |
| 19 |                        |                      |                                                                                                                                                                                                                                                                                                                                                                                                              |       |
| 20 |                        |                      |                                                                                                                                                                                                                                                                                                                                                                                                              |       |
| 21 |                        |                      |                                                                                                                                                                                                                                                                                                                                                                                                              |       |
| 22 | <b>Methods: Data</b>   |                      |                                                                                                                                                                                                                                                                                                                                                                                                              |       |
| 23 | <b>collection,</b>     |                      |                                                                                                                                                                                                                                                                                                                                                                                                              |       |
| 24 | <b>management, and</b> |                      |                                                                                                                                                                                                                                                                                                                                                                                                              |       |
| 25 | <b>analysis</b>        |                      |                                                                                                                                                                                                                                                                                                                                                                                                              |       |
| 26 |                        |                      |                                                                                                                                                                                                                                                                                                                                                                                                              |       |
| 27 |                        |                      |                                                                                                                                                                                                                                                                                                                                                                                                              |       |
| 28 |                        |                      |                                                                                                                                                                                                                                                                                                                                                                                                              |       |
| 29 | Data collection plan   | <a href="#">#18a</a> | Plans for assessment and collection of outcome, baseline, and other trial data, including any related processes to promote data quality (eg, duplicate measurements, training of assessors) and a description of study instruments (eg, questionnaires, laboratory tests) along with their reliability and validity, if known. Reference to where data collection forms can be found, if not in the protocol | 9-10  |
| 30 |                        |                      |                                                                                                                                                                                                                                                                                                                                                                                                              |       |
| 31 |                        |                      |                                                                                                                                                                                                                                                                                                                                                                                                              |       |
| 32 |                        |                      |                                                                                                                                                                                                                                                                                                                                                                                                              |       |
| 33 |                        |                      |                                                                                                                                                                                                                                                                                                                                                                                                              |       |
| 34 |                        |                      |                                                                                                                                                                                                                                                                                                                                                                                                              |       |
| 35 |                        |                      |                                                                                                                                                                                                                                                                                                                                                                                                              |       |
| 36 |                        |                      |                                                                                                                                                                                                                                                                                                                                                                                                              |       |
| 37 |                        |                      |                                                                                                                                                                                                                                                                                                                                                                                                              |       |
| 38 |                        |                      |                                                                                                                                                                                                                                                                                                                                                                                                              |       |
| 39 | Data collection plan:  | <a href="#">#18b</a> | Plans to promote participant retention and complete follow-up, including list of any outcome data to be collected for participants who discontinue or deviate from intervention protocols                                                                                                                                                                                                                    | 9     |
| 40 | retention              |                      |                                                                                                                                                                                                                                                                                                                                                                                                              |       |
| 41 |                        |                      |                                                                                                                                                                                                                                                                                                                                                                                                              |       |
| 42 |                        |                      |                                                                                                                                                                                                                                                                                                                                                                                                              |       |
| 43 |                        |                      |                                                                                                                                                                                                                                                                                                                                                                                                              |       |
| 44 | Data management        | <a href="#">#19</a>  | Plans for data entry, coding, security, and storage, including any related processes to promote data quality (eg, double data entry; range checks for data values). Reference to where details of data management procedures can be found, if not in the protocol                                                                                                                                            | 12    |
| 45 |                        |                      |                                                                                                                                                                                                                                                                                                                                                                                                              |       |
| 46 |                        |                      |                                                                                                                                                                                                                                                                                                                                                                                                              |       |
| 47 |                        |                      |                                                                                                                                                                                                                                                                                                                                                                                                              |       |
| 48 |                        |                      |                                                                                                                                                                                                                                                                                                                                                                                                              |       |
| 49 |                        |                      |                                                                                                                                                                                                                                                                                                                                                                                                              |       |
| 50 |                        |                      |                                                                                                                                                                                                                                                                                                                                                                                                              |       |
| 51 | Statistics: outcomes   | <a href="#">#20a</a> | Statistical methods for analysing primary and secondary outcomes. Reference to where other details of the statistical analysis plan can be found, if not in the protocol                                                                                                                                                                                                                                     | 10-11 |
| 52 |                        |                      |                                                                                                                                                                                                                                                                                                                                                                                                              |       |
| 53 |                        |                      |                                                                                                                                                                                                                                                                                                                                                                                                              |       |
| 54 |                        |                      |                                                                                                                                                                                                                                                                                                                                                                                                              |       |
| 55 |                        |                      |                                                                                                                                                                                                                                                                                                                                                                                                              |       |
| 56 | Statistics: additional | <a href="#">#20b</a> | Methods for any additional analyses (eg, subgroup and adjusted analyses)                                                                                                                                                                                                                                                                                                                                     | n/a   |
| 57 | analyses               |                      |                                                                                                                                                                                                                                                                                                                                                                                                              |       |
| 58 |                        |                      |                                                                                                                                                                                                                                                                                                                                                                                                              |       |
| 59 |                        |                      |                                                                                                                                                                                                                                                                                                                                                                                                              |       |
| 60 |                        |                      |                                                                                                                                                                                                                                                                                                                                                                                                              |       |



|    |                            |                      |                                                                         |       |
|----|----------------------------|----------------------|-------------------------------------------------------------------------|-------|
| 1  | Statistics: analysis       | <a href="#">#20c</a> | Definition of analysis population relating to protocol non-             | 11    |
| 2  | population and missing     |                      | adherence (eg, as randomised analysis), and any statistical methods     |       |
| 3  | data                       |                      | to handle missing data (eg, multiple imputation)                        |       |
| 4  |                            |                      |                                                                         |       |
| 5  |                            |                      |                                                                         |       |
| 6  | <b>Methods: Monitoring</b> |                      |                                                                         |       |
| 7  |                            |                      |                                                                         |       |
| 8  | Data monitoring:           | <a href="#">#21a</a> | Composition of data monitoring committee (DMC); summary of its          | 12    |
| 9  | formal committee           |                      | role and reporting structure; statement of whether it is independent    |       |
| 10 |                            |                      | from the sponsor and competing interests; and reference to where        |       |
| 11 |                            |                      | further details about its charter can be found, if not in the protocol. |       |
| 12 |                            |                      | Alternatively, an explanation of why a DMC is not needed                |       |
| 13 |                            |                      |                                                                         |       |
| 14 |                            |                      |                                                                         |       |
| 15 |                            |                      |                                                                         |       |
| 16 |                            |                      |                                                                         |       |
| 17 | Data monitoring:           | <a href="#">#21b</a> | Description of any interim analyses and stopping guidelines,            | 12-13 |
| 18 | interim analysis           |                      | including who will have access to these interim results and make        |       |
| 19 |                            |                      | the final decision to terminate the trial                               |       |
| 20 |                            |                      |                                                                         |       |
| 21 |                            |                      |                                                                         |       |
| 22 | Harms                      | <a href="#">#22</a>  | Plans for collecting, assessing, reporting, and managing solicited      | 12-13 |
| 23 |                            |                      | and spontaneously reported adverse events and other unintended          |       |
| 24 |                            |                      | effects of trial interventions or trial conduct                         |       |
| 25 |                            |                      |                                                                         |       |
| 26 |                            |                      |                                                                         |       |
| 27 | Auditing                   | <a href="#">#23</a>  | Frequency and procedures for auditing trial conduct, if any, and        | 12    |
| 28 |                            |                      | whether the process will be independent from investigators and the      |       |
| 29 |                            |                      | sponsor                                                                 |       |
| 30 |                            |                      |                                                                         |       |
| 31 |                            |                      |                                                                         |       |
| 32 |                            |                      |                                                                         |       |
| 33 | <b>Ethics and</b>          |                      |                                                                         |       |
| 34 | <b>dissemination</b>       |                      |                                                                         |       |
| 35 |                            |                      |                                                                         |       |
| 36 |                            |                      |                                                                         |       |
| 37 | Research ethics            | <a href="#">#24</a>  | Plans for seeking research ethics committee / institutional review      | 2, 12 |
| 38 | approval                   |                      | board (REC / IRB) approval                                              |       |
| 39 |                            |                      |                                                                         |       |
| 40 |                            |                      |                                                                         |       |
| 41 | Protocol amendments        | <a href="#">#25</a>  | Plans for communicating important protocol modifications (eg,           | 12    |
| 42 |                            |                      | changes to eligibility criteria, outcomes, analyses) to relevant        |       |
| 43 |                            |                      | parties (eg, investigators, REC / IRBs, trial participants, trial       |       |
| 44 |                            |                      | registries, journals, regulators)                                       |       |
| 45 |                            |                      |                                                                         |       |
| 46 |                            |                      |                                                                         |       |
| 47 | Consent or assent          | <a href="#">#26a</a> | Who will obtain informed consent or assent from potential trial         | 9     |
| 48 |                            |                      | participants or authorised surrogates, and how (see Item 32)            |       |
| 49 |                            |                      |                                                                         |       |
| 50 |                            |                      |                                                                         |       |
| 51 | Consent or assent:         | <a href="#">#26b</a> | Additional consent provisions for collection and use of participant     | n/a   |
| 52 | ancillary studies          |                      | data and biological specimens in ancillary studies, if applicable       |       |
| 53 |                            |                      |                                                                         |       |
| 54 |                            |                      |                                                                         |       |
| 55 | Confidentiality            | <a href="#">#27</a>  | How personal information about potential and enrolled participants      | 12    |
| 56 |                            |                      | will be collected, shared, and maintained in order to protect           |       |
| 57 |                            |                      | confidentiality before, during, and after the trial                     |       |
| 58 |                            |                      |                                                                         |       |
| 59 |                            |                      |                                                                         |       |
| 60 |                            |                      |                                                                         |       |

|    |                                             |                      |                                                                                                                                                                                                                                                                                     |     |
|----|---------------------------------------------|----------------------|-------------------------------------------------------------------------------------------------------------------------------------------------------------------------------------------------------------------------------------------------------------------------------------|-----|
| 1  | Declaration of interests                    | <a href="#">#28</a>  | Financial and other competing interests for principal investigators for the overall trial and each study site                                                                                                                                                                       | 14  |
| 2  |                                             |                      |                                                                                                                                                                                                                                                                                     |     |
| 3  |                                             |                      |                                                                                                                                                                                                                                                                                     |     |
| 4  |                                             |                      |                                                                                                                                                                                                                                                                                     |     |
| 5  | Data access                                 | <a href="#">#29</a>  | Statement of who will have access to the final trial dataset, and disclosure of contractual agreements that limit such access for investigators                                                                                                                                     | 12  |
| 6  |                                             |                      |                                                                                                                                                                                                                                                                                     |     |
| 7  |                                             |                      |                                                                                                                                                                                                                                                                                     |     |
| 8  |                                             |                      |                                                                                                                                                                                                                                                                                     |     |
| 9  |                                             |                      |                                                                                                                                                                                                                                                                                     |     |
| 10 | Ancillary and post trial care               | <a href="#">#30</a>  | Provisions, if any, for ancillary and post-trial care, and for compensation to those who suffer harm from trial participation                                                                                                                                                       | n/a |
| 11 |                                             |                      |                                                                                                                                                                                                                                                                                     |     |
| 12 |                                             |                      |                                                                                                                                                                                                                                                                                     |     |
| 13 |                                             |                      |                                                                                                                                                                                                                                                                                     |     |
| 14 | Dissemination policy: trial results         | <a href="#">#31a</a> | Plans for investigators and sponsor to communicate trial results to participants, healthcare professionals, the public, and other relevant groups (eg, via publication, reporting in results databases, or other data sharing arrangements), including any publication restrictions | 13  |
| 15 |                                             |                      |                                                                                                                                                                                                                                                                                     |     |
| 16 |                                             |                      |                                                                                                                                                                                                                                                                                     |     |
| 17 |                                             |                      |                                                                                                                                                                                                                                                                                     |     |
| 18 |                                             |                      |                                                                                                                                                                                                                                                                                     |     |
| 19 |                                             |                      |                                                                                                                                                                                                                                                                                     |     |
| 20 |                                             |                      |                                                                                                                                                                                                                                                                                     |     |
| 21 | Dissemination policy: authorship            | <a href="#">#31b</a> | Authorship eligibility guidelines and any intended use of professional writers                                                                                                                                                                                                      | 13  |
| 22 |                                             |                      |                                                                                                                                                                                                                                                                                     |     |
| 23 |                                             |                      |                                                                                                                                                                                                                                                                                     |     |
| 24 | Dissemination policy: reproducible research | <a href="#">#31c</a> | Plans, if any, for granting public access to the full protocol, participant-level dataset, and statistical code                                                                                                                                                                     | 13  |
| 25 |                                             |                      |                                                                                                                                                                                                                                                                                     |     |
| 26 |                                             |                      |                                                                                                                                                                                                                                                                                     |     |
| 27 |                                             |                      |                                                                                                                                                                                                                                                                                     |     |
| 28 | <b>Appendices</b>                           |                      |                                                                                                                                                                                                                                                                                     |     |
| 29 |                                             |                      |                                                                                                                                                                                                                                                                                     |     |
| 30 |                                             |                      |                                                                                                                                                                                                                                                                                     |     |
| 31 | Informed consent materials                  | <a href="#">#32</a>  | Model consent form and other related documentation given to participants and authorised surrogates                                                                                                                                                                                  | 12  |
| 32 |                                             |                      |                                                                                                                                                                                                                                                                                     |     |
| 33 |                                             |                      |                                                                                                                                                                                                                                                                                     |     |
| 34 |                                             |                      |                                                                                                                                                                                                                                                                                     |     |
| 35 | Biological specimens                        | <a href="#">#33</a>  | Plans for collection, laboratory evaluation, and storage of biological specimens for genetic or molecular analysis in the current trial and for future use in ancillary studies, if applicable                                                                                      | n/a |
| 36 |                                             |                      |                                                                                                                                                                                                                                                                                     |     |
| 37 |                                             |                      |                                                                                                                                                                                                                                                                                     |     |
| 38 |                                             |                      |                                                                                                                                                                                                                                                                                     |     |
| 39 |                                             |                      |                                                                                                                                                                                                                                                                                     |     |

40 The SPIRIT checklist is distributed under the terms of the Creative Commons Attribution License CC-BY-ND  
 41 3.0. This checklist was completed on 08. May 2020 using <https://www.goodreports.org/>, a tool made by the  
 42 [EQUATOR Network](#) in collaboration with [Penelope.ai](#)  
 43  
 44  
 45  
 46  
 47  
 48  
 49  
 50  
 51  
 52  
 53  
 54  
 55  
 56  
 57  
 58  
 59  
 60

# BMJ Open

**Guided relaxation-based virtual reality versus distraction-based virtual reality or passive control for postoperative pain management in children and adolescents undergoing Nuss repair of pectus excavatum: protocol for a prospective, randomized, controlled trial (FOREVR Peds trial)**

|                                 |                                                                                                                                                                                                                                                                                                                                                                                                                                                                                                                                                                                                                                                                                                                                                                                                                                                                                                                    |
|---------------------------------|--------------------------------------------------------------------------------------------------------------------------------------------------------------------------------------------------------------------------------------------------------------------------------------------------------------------------------------------------------------------------------------------------------------------------------------------------------------------------------------------------------------------------------------------------------------------------------------------------------------------------------------------------------------------------------------------------------------------------------------------------------------------------------------------------------------------------------------------------------------------------------------------------------------------|
| Journal:                        | <i>BMJ Open</i>                                                                                                                                                                                                                                                                                                                                                                                                                                                                                                                                                                                                                                                                                                                                                                                                                                                                                                    |
| Manuscript ID                   | bmjopen-2020-040295.R3                                                                                                                                                                                                                                                                                                                                                                                                                                                                                                                                                                                                                                                                                                                                                                                                                                                                                             |
| Article Type:                   | Protocol                                                                                                                                                                                                                                                                                                                                                                                                                                                                                                                                                                                                                                                                                                                                                                                                                                                                                                           |
| Date Submitted by the Author:   | 05-Dec-2020                                                                                                                                                                                                                                                                                                                                                                                                                                                                                                                                                                                                                                                                                                                                                                                                                                                                                                        |
| Complete List of Authors:       | Olbrecht, Vanessa A. ; Cincinnati Children's Hospital Medical Center, Anesthesia<br>Williams, Sara; Cincinnati Children's Hospital Medical Center, Behavioral Medicine and Clinical Psychology<br>O'Connor, Keith; Cincinnati Children's Hospital Medical Center, Anesthesia<br>Boehmer, Chloe; Cincinnati Children's Hospital Medical Center, Anesthesia<br>Marchant, Gilbert; Cincinnati Children's Hospital Medical Center, Anesthesiology<br>Glynn, Susan; Cincinnati Children's Hospital Medical Center, Anesthesia<br>Geisler, Kristie; Cincinnati Children's Hospital Medical Center, Anesthesia<br>Ding, Lili; Cincinnati Children's Hospital Medical Center, Biostatistics and Epidemiology<br>Yang, Gang; Cincinnati Children's Hospital Medical Center, Biostatistics and Epidemiology<br>King, Christopher; Cincinnati Children's Hospital Medical Center, Behavioral Medicine and Clinical Psychology |
| <b>Primary Subject Heading</b>: | Anaesthesia                                                                                                                                                                                                                                                                                                                                                                                                                                                                                                                                                                                                                                                                                                                                                                                                                                                                                                        |
| Secondary Subject Heading:      | Complementary medicine, Paediatrics                                                                                                                                                                                                                                                                                                                                                                                                                                                                                                                                                                                                                                                                                                                                                                                                                                                                                |
| Keywords:                       | Pain management < ANAESTHETICS, Paediatric anaesthesia < ANAESTHETICS, COMPLEMENTARY MEDICINE, Paediatric thoracic surgery < PAEDIATRIC SURGERY, Clinical trials < THERAPEUTICS                                                                                                                                                                                                                                                                                                                                                                                                                                                                                                                                                                                                                                                                                                                                    |
|                                 |                                                                                                                                                                                                                                                                                                                                                                                                                                                                                                                                                                                                                                                                                                                                                                                                                                                                                                                    |

SCHOLARONE™  
Manuscripts



I, the Submitting Author has the right to grant and does grant on behalf of all authors of the Work (as defined in the below author licence), an exclusive licence and/or a non-exclusive licence for contributions from authors who are: i) UK Crown employees; ii) where BMJ has agreed a CC-BY licence shall apply, and/or iii) in accordance with the terms applicable for US Federal Government officers or employees acting as part of their official duties; on a worldwide, perpetual, irrevocable, royalty-free basis to BMJ Publishing Group Ltd ("BMJ") its licensees and where the relevant Journal is co-owned by BMJ to the co-owners of the Journal, to publish the Work in this journal and any other BMJ products and to exploit all rights, as set out in our [licence](#).

The Submitting Author accepts and understands that any supply made under these terms is made by BMJ to the Submitting Author unless you are acting as an employee on behalf of your employer or a postgraduate student of an affiliated institution which is paying any applicable article publishing charge ("APC") for Open Access articles. Where the Submitting Author wishes to make the Work available on an Open Access basis (and intends to pay the relevant APC), the terms of reuse of such Open Access shall be governed by a Creative Commons licence – details of these licences and which [Creative Commons](#) licence will apply to this Work are set out in our licence referred to above.

Other than as permitted in any relevant BMJ Author's Self Archiving Policies, I confirm this Work has not been accepted for publication elsewhere, is not being considered for publication elsewhere and does not duplicate material already published. I confirm all authors consent to publication of this Work and authorise the granting of this licence.

1  
2  
3 **Guided relaxation-based virtual reality versus distraction-based virtual reality or passive**  
4 **control for postoperative pain management in children and adolescents undergoing Nuss**  
5 **repair of pectus excavatum: protocol for a prospective, randomized, controlled trial**  
6 **(FOREVR Peds trial)**  
7  
8

9  
10 Vanessa A. Olbrecht, MD, MBA,<sup>\*1,2,3,5</sup> Sara E. Williams, PhD,<sup>1,4,5</sup> Keith T. O'Connor, BS,<sup>2,3</sup>  
11 Chloe O. Boehmer,<sup>2</sup> Gilbert W. Marchant, BS,<sup>2,3</sup> Susan M. Glynn BA, CCRP,<sup>2</sup> Kristie J. Geisler,  
12 BS, CCRP,<sup>2</sup> Lili Ding, PhD,<sup>3,5,6</sup> Gang Yang, PhD,<sup>3,5,6</sup> Christopher D. King, PhD<sup>1,4,5</sup>  
13  
14  
15

16 **Affiliations:**

17  
18 <sup>1</sup>*Center for Understanding Pediatric Pain (CUPP), Cincinnati Children's, Cincinnati, Ohio,*  
19 *USA.*

20  
21 <sup>2</sup>*Department of Anesthesiology, Cincinnati Children's Hospital Medical Center, Cincinnati,*  
22 *Ohio, USA.*

23  
24 <sup>3</sup>*University of Cincinnati College of Medicine, Cincinnati, Ohio, USA.*

25  
26 <sup>4</sup>*Division of Behavioral Medicine and Clinical Psychology, Cincinnati Children's, Cincinnati,*  
27 *Ohio, USA.*

28  
29 <sup>5</sup>*Department of Pediatrics, University of Cincinnati, College of Medicine, Cincinnati, Ohio,*  
30 *USA.*

31  
32 <sup>6</sup>*Division of Biostatistics and Epidemiology, Cincinnati Children's Hospital Medical Center*  
33 *Cincinnati OH 45229, USA.*  
34

35 **Corresponding Author:**

36  
37 Vanessa A. Olbrecht, MD, MBA  
38 Cincinnati Children's Hospital Medical Center  
39 Department of Anesthesiology  
40 3333 Burnet Avenue, MLC 2001  
41 Cincinnati, OH 45229, USA  
42 Telephone: (513) 213-1107  
43 Fax: (513) 636-7337  
44 Email: [Vanessa.Olbrecht@cchmc.org](mailto:Vanessa.Olbrecht@cchmc.org)  
45  
46  
47

48 **Key words:** Postoperative pain, virtual reality (VR), guided relaxation-based virtual reality (VR-  
49 GR), pediatric anesthesia, pediatric pain  
50  
51  
52

53 **Word Count:** 3,942 words (excluding title page, abstract, references, figures and tables)  
54  
55  
56  
57  
58  
59  
60

## ABSTRACT

**Introduction** Virtual reality (VR) offers an innovative method to deliver nonpharmacological pain management. Distraction-based VR (VR-D) using immersive games to redirect attention has shown short-term pain reductions in various settings. To create lasting pain reduction, VR-based strategies must go beyond distraction. Guided relaxation-based VR (VR-GR) integrates pain-relieving mind-body based guided relaxation with VR, a novel therapy delivery mechanism. The primary aim of this study is to assess the impact of daily VR-GR, VR-D, and 360 video (passive control) on pain intensity. We will also assess the impact of these interventions on pain unpleasantness, anxiety, and opioid and benzodiazepine consumption. The secondary aim of this study will assess the impact of psychological factors (anxiety sensitivity, pain catastrophizing) on pain following VR.

**Methods and analysis** This is a single center, prospective, randomized, clinical trial. Ninety children/adolescents, ages 8 to 18 years, presenting for Nuss repair of pectus excavatum will be randomized to 1 of 3 study arms (VR-GR, VR-D, 360 video). Patients will use the Starlight Xperience (Google Daydream) VR suite for 10-minutes. Patients randomized to VR-GR (n=30) will engage in guided relaxation/mindfulness with the Aurora application. Patients randomized to VR-D (n=30) will play 1 of 3 distraction-based games, and those randomized to the 360 video (n=30) will watch the Aurora application without audio instructions or sound. Primary outcome is pain intensity. Secondary outcomes include pain unpleasantness, anxiety, and opioid and benzodiazepine consumption.

**Ethics and dissemination** This study follows SPIRIT guidelines. The protocol was approved by the Cincinnati Children's Hospital Medical Center Institutional Review Board. Patient recruitment began in July 2020. Written informed consent will be obtained for all participants. All information acquired will be disseminated via scientific meetings and published in peer-reviewed journals.

**Trial registration number** ClinicalTrials.gov [NCT04351776](https://clinicaltrials.gov/ct2/show/study/NCT04351776), registered April 3, 2020.

## ARTICLE SUMMARY

### *Strengths and limitations of this study*

- This is a prospective, randomized clinical trial, which provides the best clinical evidence and support for VR as an intervention.
- This is the first study examining the use of VR-based interventions in a postoperative pediatric population.
- Due to the nature of the study, it cannot be blinded.
- One limitation is the specific patient population being studied: children and adolescents between the ages of 8 and 18 years undergoing Nuss repair of pectus excavatum. Patient selection may limit generalizability of findings.
- A second limitation is the conduction of the study at an academic, tertiary care, pediatric hospital; as such, these results may not be generalizable to patients in other clinical settings.

## INTRODUCTION

### Background and rationale

Children and adolescents with pain are at risk of opioid abuse,<sup>1</sup> and many are initially exposed to narcotics prescribed to treat pain.<sup>2</sup> More specifically, children and adolescents are at risk of persistent pain and opioid use after surgery, with the surgical period being a significant risk for the initial opioid exposure in children.<sup>3-5</sup> Over 25% of patients with chronic pain who are on opioids were first exposed after surgery.<sup>6</sup> Even short-term opioid use after surgery places a patient at risk of long-term abuse. Just 5 days of opioid use can increase the risk of persistent use, and use for more than 8 days may increase the risk to as much as 13.5%.<sup>7</sup> While this risk is well documented in adults, few studies address this topic in children.<sup>8</sup> A recent retrospective study of opioid-naïve surgical patients found persistent opioid use in 4.8% of adolescents versus 0.1% in a matched, nonsurgical cohort, equating to a 50-fold increase in risk.<sup>3</sup>

Pectus excavatum, a depression of the anterior chest wall, is often corrected via the Nuss repair, a minimally invasive procedure in which a bar(s) is inserted beneath the sternum and flipped to elevate the chest.<sup>9</sup> Although minimally invasive, this procedure is associated with significant postoperative pain.<sup>10</sup> Despite efforts at multimodal therapy, the percentage of patients experiencing severe pain after surgery has not changed over the last 20 years.<sup>11, 12</sup> Existing pediatric studies have identified an approximately 20% incidence of persistent postsurgical pain beyond what is expected from surgery alone.<sup>13</sup> While 80% of these patients recover within about one month, 20% maintain a reduced quality of life secondary to persistent pain.<sup>13</sup> While the consequences of opioids exposure are significant, poorly controlled postsurgical pain is also problematic. Ineffective postoperative pain management is associated with increased morbidity, poorer physical functioning, longer recover, and higher cost.<sup>14, 15</sup> Multimodal pain management requires the exploration of safe, effective, nonpharmacological strategies that reduce pain and opioid consumption.<sup>16</sup> Nonpharmacological methods to treat pain can both improve analgesia after surgery and decrease opioid exposure, a risk factor for future addiction.<sup>1</sup>

Virtual reality (VR) may offer a safe, innovative, nonpharmacological tool with the potential to decrease pain and medication consumption. VR provides an immersive, multisensory, three-dimensional (3D) environment that enables individuals to have modified experiences of reality



1  
2  
3 by creating a sense of “presence,” making it an excellent candidate for distraction-based  
4 therapy.<sup>17</sup> Distraction-based virtual reality (VR-D) is hypothesized to reduce pain through the  
5 redirection of attention augmented by the immersion created by VR.<sup>18, 19</sup> VR-D has been used  
6 during painful procedures, the postoperative period, and labor to help decrease pain by  
7 redirecting attention.<sup>20-32</sup> These studies show transient reductions in pain insufficient to treat  
8 prolonged acute pain experiences,<sup>33, 34</sup> including postoperative pain, suggesting that redirection  
9 of attention alone is not adequate to help manage pain that is more sustained. Comparatively,  
10 nonpharmacological alternatives that utilize mind-body based therapies delivered in a traditional  
11 format, like relaxation and slow breathing, are able to decrease anxiety and pain in children  
12 undergoing surgery.<sup>35</sup> Unlike distraction, slow breathing during relaxation results in increased  
13 heartrate variability,<sup>36</sup> which activates the parasympathetic nervous system, resulting in pain  
14 reduction.<sup>37, 38</sup> However, despite their efficacy, these therapies are fraught with challenges, such  
15 as barriers to accessing care, high cost, need for multiple visits, and provider shortages.<sup>39</sup> VR can  
16 increase accessibility to these mind-body therapies and enhance acceptability, motivation, and  
17 adherence in pediatric patients compared to methods without VR.<sup>40</sup> Combining strategies of  
18 traditional mind-body therapies, like relaxation and slow breathing, with the immersive nature of  
19 VR opens new possibilities for multimodal analgesia in the pediatric population and has the  
20 potential to simultaneously minimize acute postoperative pain and opioid consumption. Guided  
21 relaxation-based VR (VR-GR) is a promising mechanism to deliver mind-body based therapy,  
22 improve postoperative pain control, and avoid challenges common with mind-body therapies  
23 delivered in the traditional format.

24  
25  
26  
27  
28  
29  
30  
31  
32  
33  
34  
35  
36  
37  
38  
39  
40  
41 We have designed a prospective, randomized, clinical trial to assess the efficacy of VR-GR to  
42 decrease pain, anxiety, and opioid consumption in children and adolescents undergoing Nuss  
43 repair of pectus excavatum and hypothesize that VR-GR will be more effective at reducing pain,  
44 anxiety, and opioid consumption in this population than VR-D or a passive control.

### 45 46 47 48 49 **Objectives**

50  
51 The primary objective of this study is to determine the impact of VR-GR on pain intensity in  
52 children and adolescents undergoing Nuss repair of pectus excavatum compared to VR-D and  
53 360 video both during the hospitalization (primary) and up to one month following discharge  
54 (secondary). We will also assess the impact of VR-GR on pain unpleasantness, anxiety, and  
55  
56  
57  
58  
59  
60

1  
2  
3 opioid and benzodiazepine consumption compared to VR-D and 360 video. The secondary  
4 objective of this study is to determine the role of anxiety sensitivity and pain catastrophizing on  
5 changes in pain and anxiety following VR-GR, VR-D, and 360 video both during hospitalization  
6 and 1-month post discharge in this same patient population using standard questionnaires.  
7  
8  
9

## 10 11 12 **METHODS AND ANALYSIS**

13 The FOREVR Peds study is a single center, prospective, unblinded, randomized clinical trial  
14 with three groups: VR-GR, VR-D or 360 video. A daily, 10-minute session of these respective  
15 interventions is administered to children and adolescents between the age of 8 and 18 years  
16 undergoing Nuss repair of pectus excavatum for up to 3 days after surgery. The primary  
17 objective is to determine the impact of VR-GR on pain intensity compared to VR-D and 360  
18 video during hospitalization. Patient recruitment began in July 2020 and we anticipate a total  
19 study duration of two years. This study protocol complies with the SPIRIT Statement as well as  
20 the CONSORT Statement (Figure 1). The study was registered at ClinicalTrials.gov  
21 (NCT04351776) on April 3, 2020 and all trial registration data can be found on the  
22 [ClinicalTrials.gov](https://www.clinicaltrials.gov) website.  
23  
24  
25  
26  
27  
28  
29  
30

### 31 32 **Study setting**

33 Cincinnati Children's Hospital Medical Center (CCHMC), a tertiary care, academic, pediatric  
34 hospital.  
35  
36  
37

### 38 39 **Study design**

40 This is a single-center, prospective, randomized clinical trial of children and adolescents with  
41 acute postoperative pain following Nuss repair of pectus excavatum to assess the impact of  
42 multiple VR-GR sessions on pain and medication utilization in relation to patient anxiety and  
43 pain catastrophizing. Figure 1 summarizes the study design. We are assessing the acute and long-  
44 term impact of each intervention on changes in pain intensity, pain unpleasantness, anxiety, and  
45 opioid and benzodiazepine consumption during hospitalization and following discharge, where  
46 acute impact on pain intensity is the primary focus. Figure 2 summarizes this experimental  
47 design. All patients are managed postoperatively via the pectus surgery pain management  
48 protocol, which standardizes all non-controlled medications received by patients. Patients  
49  
50  
51  
52  
53  
54  
55  
56  
57  
58  
59  
60

1  
2  
3 enrolled in this study are managed per this protocol (standard care) and receive the additional  
4 intervention of VR or 360 video.  
5  
6

## 7 **Outcome measures**

### 8 *Primary outcome:*

9  
10 Our primary outcome is pain intensity following daily VR-GR, VR-D, and 360 video in our  
11 population during hospitalization.  
12  
13

### 14 *Secondary outcomes:*

15  
16 Our secondary outcomes are pain unpleasantness, anxiety, and opioid and benzodiazepine  
17 consumption following daily VR-GR, VR-D, and 360 video in our population during  
18 hospitalization and up to 1-month following discharge. We will also assess the impact of pain  
19 catastrophizing and anxiety sensitivity on these outcomes.  
20  
21  
22  
23

## 24 **Participants**

25  
26 We are recruiting 90 adolescents (30 per group) between the age of 8 and 18 years undergoing  
27 Nuss repair of pectus excavatum. Eligibility criteria have been chosen to correspond with our  
28 prior work and result in a population with whom our group has substantial experience.  
29  
30  
31

### 32 *Inclusion Criteria:*

33  
34 Patients are included based on the following criteria: (a) Between the ages of 8 and 18 years; (b)  
35 Able to read, understand, and speak English; (c) Scheduled to undergo Nuss repair of pectus  
36 excavatum at CCHMC.  
37  
38

### 39 *Exclusion criteria:*

40  
41 Patients are excluded for the following reasons: (a) Patients < 8 or > 18 years of age at the time  
42 study enrollment; (b) History of significant developmental delay, underlying psychiatric disease  
43 associated with delusions or hallucinations, or significant neurological conditions, including  
44 epilepsy, severe motion sickness, or active nausea/vomiting; (c) Conditions that preclude  
45 application and use of the VR device, including craniofacial abnormalities.  
46  
47  
48  
49

## 50 **Randomization**

51  
52 Eligible patients are randomly assigned in a 1:1:1 fashion to the following three study groups:  
53 VR-GR, VR-D, and 360 video (passive control) following study enrollment based on subject  
54 number. The randomization scheme was generated using an online randomizing tool  
55  
56  
57

1  
2  
3 ([www.randomizer.org](http://www.randomizer.org)) to assign patient study numbers into the 1 of 3 groups. The randomization  
4 scheme is stored in our REDCap database (<https://www.project-redcap.org/>), a secure web  
5 application for building and maintaining secure databases and surveys. Randomization has  
6 allowed for equal distribution of demographic characteristics among the three groups. Our  
7 clinical research coordinator is responsible for assigning patients to each study group based on  
8 this randomization scheme.  
9  
10  
11  
12  
13

## 14 **Interventions**

15 All patients use the VR device and software from the Starlight Children's Foundation, the  
16 Starlight Xperience device (Google Daydream). This VR device is commercially available and is  
17 not FDA regulated. The Google Daydream is an all-in-one headset, so no additional hardware is  
18 required to deliver the VR experience. A set of headphones, included with the headset, is used to  
19 deliver audio instructions and sound, creating a fully immersive experience. Patients are visited  
20 daily to undergo a single, 10-minute session with the VR headset for up to 3 days after surgery.  
21 The 10-minute daily session is based on a standard time duration and frequency for mind-body  
22 therapies.<sup>38, 41</sup> We will work with the care team to standardize the timing of the daily study visit  
23 for all patients.  
24  
25  
26  
27  
28  
29  
30  
31  
32  
33

### 34 *VR-GR (intervention)*

35 Patients randomized to the VR-GR group use the Aurora application to receive  
36 relaxation/mindfulness content. This application acts as an escape for patients as well as a tool to  
37 teach slow breathing and relaxation techniques. Patients are transported to an alpine meadow  
38 with dynamic daytime, and later, nighttime scenery. With the help of a 10-minute narrative,  
39 participants are guided to sync their breathing with their surroundings: the rise and fall of a  
40 floating butterfly during the day and the movement of the northern lights in the sky at night.  
41  
42  
43  
44  
45  
46

### 47 *VR-D (active control):*

48 Patients randomized to the VR-D group choose 1 of 3 distraction-based games: Space Pups,  
49 Pebbles the Penguin, or Wonderglade. Each provides a similar distraction-based experience for  
50 the user. 1) *Space Pups*: user controls an astronaut space puppy and works to collect treats to the  
51 beat of the music. 2) *Pebbles the Penguin*: user controls a penguin sliding down a mountain and  
52  
53  
54  
55  
56  
57  
58  
59  
60

works to collect shiny pebbles to unlock new power-ups. 3) *Wonderglade*: 5 different carnival-themed mini-games like basketball, miniature golf, and racing.

*360 video (passive control)*:

Patients view a 360 video of a nature scene like the Aurora application but will not receive a guided tutorial on how to relax and sync their breathing with the application. They also do not receive any audio instructions or sound, decreasing the fully immersive experience.

### **Patient recruitment**

On average, 125 to 150 Nuss repairs are performed at CCHMC annually. We plan to enroll a total of 90 patients. Patients scheduled to undergo Nuss repair of pectus excavatum are being recruited continuously throughout the course of the study until enrollment targets are met. We are recruiting about two patients per week given our surgical volume. We receive notification of all Nuss repair surgery bookings by the surgery schedulers to identify possible participants, allowing for eligible patients to be identified greater than 1 week prior to surgery. The operating room schedule as well as the surgical patient list is screened for eligible patients based upon age criteria. Patients meeting age criteria undergo screening of their available electronic medical record to assess study eligibility. Eligible patients are approached prior to surgery. If patients wish to participate, appropriate consent (and assent for patients  $\geq 11$  years of age) is obtained and eligibility criteria are verified. Patients are randomized (1:1:1 ratio) to VR-GR (intervention), VR-D (active control), and 360 video (passive control). A randomization scheme was created prior to the start of the study using an online tool ([www.randomizer.org](http://www.randomizer.org)) and patients are assigned to a group based upon study number. Patients receive a tutorial on the VR device at the time of enrollment. Demographic, health information, and medical history is recorded and documented in the REDCap database. Patients are given a small stipend for participation to help increase recruitment and adherence. Our clinical research coordinator is responsible for enrolling patients.

### **Study visits**

Patients are visited daily to undergo a single, 10-minute session. Every effort is made to ensure consistency in timing of the visits for all patients. Prior to surgery, patients complete two validated questionnaires to assess baseline trait measures: the Pain Catastrophizing Scale for

1  
2  
3 Children (PCS-C)<sup>42</sup> and the Child Anxiety Sensitivity Index (CASI).<sup>43</sup> They also complete a  
4 health history questionnaire and a baseline pain intensity, pain unpleasantness, and anxiety rating  
5 is obtained using the Numerical Rating Scale (NRS).<sup>44, 45</sup> Pain intensity, pain unpleasantness, and  
6 anxiety ratings are repeated immediately, 15 minutes, and 30 minutes following session  
7 completion. Patients typically remain in the hospital for 3 to 4 days following Nuss repair.  
8 During their inpatient stay, participants have daily study visits, repeating the same process as the  
9 first session; patients will not repeat the PCS-C or CASI surveys. At the last visit, patients are  
10 given a satisfaction survey to gather qualitative feedback about the VR experience.  
11  
12  
13  
14  
15  
16  
17

### 18 **Data collection**

19 For each eligible participant, data is collected from patient history/interview and the electronic  
20 medical record in a standardized case report form in the REDCap system by a clinical research  
21 coordinator (CRC) or student who maintain CITI training in accordance with our local  
22 institutional review board (IRB) under the direct supervision of the principal investigator (PI).  
23 Total opioid and benzodiazepine usage are collected from the electronic medical record for 24  
24 hours after each session in mg/kg/day to account for patient weight. All medication consumption  
25 is collected for assessment of non-opioid analgesics and to ensure consistency with the pectus  
26 pain management protocol. To assess pain intensity and unpleasantness after hospital discharge,  
27 patients use a daily log to record pain scores using the NRS for one month. We use eCAP  
28 (electronic capture pill dispenser, <https://www.informationmediary.com/nfc-smart-packaging-devices/ecap-smart-pill-bottle/>)  
29 to document medication consumption. Weekly reminders are  
30 sent using Twilio, and telephone follow-up is done at two weeks and one month to help improve  
31 patient adherence. Prescription cross-verification is done using controlled substance reporting  
32 databases for Ohio, Kentucky, and Indiana (OARRS, KASPER, and INSPECT, respectively) to  
33 verify data collected from patient logs and eCAP.  
34  
35  
36  
37  
38  
39  
40  
41  
42  
43  
44  
45  
46

### 47 **Measurements**

48 a) Pain intensity, pain unpleasantness, and anxiety ratings are assessed using the NRS.<sup>44, 45</sup> b)  
49 Pain catastrophizing is assessed using PCS-C.<sup>42</sup> c) Anxiety sensitivity is assessed using CASI.<sup>43</sup>  
50 d) Total opioid and benzodiazepine usage is collected from EPIC for 24 hours after each session  
51 and up to 1-month post-hospital discharge via eCAP. Opioid consumption is converted to  
52 morphine equivalents in mg/kg/day. All medication consumption is collected for assessment of  
53  
54  
55  
56  
57  
58  
59  
60

1  
2  
3 non-opioid analgesics and converted to milligram per kilogram per day. Table 1 summarizes the  
4 measurements used in the study.  
5  
6  
7

### 8 **Sample size calculation**

9  
10 Sample size calculation is based on preliminary data assessing the impact of VR-D to affect  
11 changes in pain intensity in children and adolescents following surgery (unpublished).  
12 Preliminary data showed that the average change in pain intensity across time was -1, with  
13 standard deviation (SD) 1.2 and correlation between measurement pairs of 0.88. Assuming  
14 similar results in the passive control group, sample size of 30/group will have 80% power to  
15 detect differences in mean changes of one between VR-GR and the two control groups. We  
16 expect a difference of  $\geq 1$  between VR-GR and VR-D to emerge with multiple sessions as  
17 proposed with this study. Significance (alpha) is 0.025 to control for two comparisons. We are  
18 recruiting 90 patients, 30 per group.  
19  
20  
21  
22  
23  
24  
25  
26

### 27 **Statistical analysis**

28  
29 Statistical analysis will be done with SAS 9.4 (Cary, NC). Descriptive statistics will be  
30 calculated and summarized (*continuous*: mean  $\pm$  SD; *categorical*: frequency %). Prior to  
31 analysis, assumption of normality will be assessed for continuous variables and corrected using  
32 log transformation when appropriate. All statistical tests will be two-sided. Bonferroni correction  
33 will be made as appropriate for comparisons. Change from baseline for primary and secondary  
34 outcomes will be tested for normality and deviation from zero using paired tests (t-test or signed-  
35 rank, as appropriate) at individual time points after interventions. Change from baseline will be  
36 compared between groups using two-sample t-test or Wilcoxon rank-sum test (between two  
37 groups, i.e., VR-GR vs. VR-D and VR-GR vs. 360 video) and ANOVA or Kruskal-Wallis test  
38 (across three groups) at individual time points after the sessions.  
39  
40  
41  
42  
43  
44  
45  
46  
47

48 Primary analysis for the primary outcome, pain intensity during hospitalization, will be  
49 conducted on the intent to treat population, which is defined as all patients who were  
50 randomized. All patients who were randomized will be included in analysis and analyzed  
51 according to the group to which they were originally assigned, regardless of the treatment (if  
52 any) they received. The primary analysis will be mixed effects models for repeated measures  
53  
54  
55  
56  
57  
58  
59  
60

1  
2  
3 with baseline value, intervention group, time (0, 15, 30 minutes after intervention), and group  
4 and time interaction to test the hypothesis that VR-GR reduces pain more than controls. Similar  
5 analysis will be run for secondary outcomes including anxiety, and opioid and benzodiazepine  
6 consumption. Potential covariates (such as age and sex) will be tested for association with the  
7 outcomes using univariate approaches and included in the mixed effect models if significant.  
8 Pain and opioid use 1-month post-discharge will be compared between intervention groups using  
9 ANOVA (with adjustment of possible covariates) or Kruskal-Wallis test, as appropriate, based  
10 on data distribution.  
11

12  
13  
14  
15  
16  
17  
18 Anxiety sensitivity (or pain catastrophizing) will be dichotomized using the sample median (or  
19 tertiles depending on distribution) and its effect on response to intervention (change in pain  
20 intensity from baseline) will be tested using the two-sample t-test or Wilcoxon rank-sum test, as  
21 appropriate at individual time points (0, 15, 30 minutes) after intervention. Mixed effects models  
22 for repeated measures (change in pain intensity from baseline) with high or low anxiety  
23 sensitivity (or pain catastrophizing) group, time (0, 15, 30 minutes after intervention), and group  
24 and time interaction will be used to test the hypothesis that patients with greater anxiety  
25 sensitivity and pain catastrophizing will have a larger reduction in pain vs. patients with less  
26 anxiety sensitivity and pain catastrophizing. Assuming the same SD and correlation between  
27 pain intensity measurement pairs from the primary power analysis, sample size of 15/group (high  
28 vs. low anxiety or pain catastrophizing dichotomized at median for the VR-GR group) will have  
29 80% power to detect differences in mean changes of pain intensity of 1.3 between the two  
30 groups, with  $\alpha=0.05$ . The same analysis will be repeated for pain unpleasantness and anxiety.  
31  
32  
33  
34  
35  
36  
37  
38  
39  
40

41  
42 We are making every effort to ensure that at least one daily VR session is completed for each  
43 study participant and that all data extraction is complete to avoid missing data. We are assessing  
44 missing data for all study variables. Chart review for missing data on demographics, medical  
45 history, etc. is performed when feasible. Missing outcome data will be statistically imputed using  
46 multiple imputation, and a sensitivity analysis will be conducted to compare analysis results with  
47 and without imputation. We do not anticipate that age will have an impact on our findings.  
48

49  
50  
51 Although the trial is not powered to detect overall differences between groups by age, we will  
52 perform an exploratory analysis in which we will stratify by age (age 8-13 years, 14-18 years) to  
53 explore a possible influence of age.  
54  
55  
56  
57



## **ETHICS SAFETY AND DISSEMINATION**

### **Ethics**

This study is being conducted in accordance with the rules and regulations applicable to the conduct of ethical research and this study protocol has been approved by the IRB at CCHMC (IRB #2019-1090). This protocol includes clear delineation of the protocol version identifier and date on each protocol amendment submitted to the IRB; clear delineation of plans for data entry, coding, security, and storage; clear delineation of mechanisms to ensure patient confidentiality, including how personal information will be collected, shared, and maintained in order to protect confidentiality before, during, and after the trial; statements regarding who has access to data collected during this study; and a model consent form and other related documentation given to participants and/or guardians. We do not anticipate any major protocol modifications during the duration of this study.

### **Safety**

It is anticipated that the risk to participants in this study is minimal. The specific VR device used in this study is a minimal risk device, and because it is considered a relaxation device by the FDA, it is not regulated as a clinical device. Risks specific to VR are minimal, with the greatest risk being motion sickness and/or nausea while the headset is in place.<sup>46</sup> There is a theoretical risk of inducing seizures (0.025% in a pediatric data set supplied by a similar Samsung device). We are minimizing these risks by excluding patients with a history of significant neurological disorders, including epilepsy and severe motion sickness/nausea. Patients are also explicitly instructed to remove the headset should any side effects or discomfort occur. The PI continually monitors all risks to the participants. Weekly lab meetings are used to address quality assurance and safety concerns with the study. Research personnel are instructed to inform the PI immediately with any safety concerns or adverse events (AEs). The IRB will also be updated when any serious AEs (SAEs) occur or when mild or moderate AEs determined to be a result from study participation occur. SAEs that are unanticipated, serious, and possibly related to study participation will be reported to the data safety monitoring committee (DSMC), IRB, and any other necessary study regulatory committee. We do not anticipate any SAEs that would require stopping this trial early. Therefore, we do not plan to conduct interim analysis for safety. This consideration will change if SAEs are reported during the study.

1  
2  
3 Although the risk to patients from this clinical trial is low, a DSMC is being utilized to monitor  
4 safety. The DSMC is composed of three experts (clinical research, pain management, and digital  
5 technology) who are independent of the protocol. The DSMC will report to the IRB. This  
6  
7 protocol is approved by the IRB at CCHMC in compliance with existing regulations and policies  
8  
9 for the conduct of clinical research.  
10  
11  
12

### 13 **Dissemination**

14 Unique data will be obtained from this research and will be widely disseminated through  
15 conference presentations at national and international meetings and through publication of  
16 manuscripts in peer-reviewed publications. Participants may receive trial results if interested. All  
17  
18 authors are eligible to participate in dissemination and we do not plan to use professional writers  
19  
20 to disseminate study results.  
21  
22  
23

### 24 **Patient and public involvement**

25  
26 No patients or members of the public were involved in the design, recruitment, or conduct of this  
27 study. Consideration of the burden of the intervention and time required to participate in this  
28 research was assessed during pilot data collection using VR in the acute postoperative pain  
29 population at our institution and information gathered from this pilot study helped guide the  
30 development of this clinical trial. Participants may receive information about study results if they  
31 wish via a letter describing results to participants. We will share access to the full protocol to  
32 requesting individuals/institutions.  
33  
34  
35  
36  
37  
38  
39  
40  
41  
42  
43  
44  
45  
46  
47  
48  
49  
50  
51  
52  
53  
54  
55  
56  
57  
58  
59  
60

## **AUTHOR CONTRIBUTIONS**

VO, SW, and CK contributed to the conception of this idea, the design of the research protocol and study, and the writing of this manuscript. KO, CB, GM, SG, and KJ provided input regarding the design and implementation of the study protocol and procedures. LD and GY contributed to the design of the research protocol and the statistical analysis plan development. All authors revised and modified this manuscript. They will all approve the final version.

## **FUNDING**

This study is supported by an internal CCHMC research grant, Research Innovation/Pilot Funding Program as well as the Anesthesiology Department at CCHMC. Award/grant number not applicable.

## **DATA STATEMENT**

Technical appendix, statistical code, and/or the study dataset will be available to the public following study completion.

## **COMPETING INTERESTS**

The authors have no competing interests to disclose.

## **ACKNOWLEDGEMENTS**

The authors have no acknowledgements to disclose.

## REFERENCES

1. Hudgins JD, Porter JJ, Monuteaux MC, et al. Trends in Opioid Prescribing for Adolescents and Young Adults in Ambulatory Care Settings. *Pediatrics* 2019; 143: 1-9. 2019/05/30. DOI: 10.1542/peds.2018-1578.
2. Johnston L.D. MRA, O'Malley P.M., et al. Key Findings on Adolescent Drug Use. *National Survey Results on Drug Use 1975-2017* 2017.
3. Harbaugh CM, Lee JS, Hu HM, et al. Persistent Opioid Use Among Pediatric Patients After Surgery. *Pediatrics* 2018; 141 2017/12/06. DOI: 10.1542/peds.2017-2439.
4. Chambers RA, Taylor JR and Potenza MN. Developmental neurocircuitry of motivation in adolescence: a critical period of addiction vulnerability. *Am J Psychiatry* 2003; 160: 1041-1052. 2003/06/05. DOI: 10.1176/appi.ajp.160.6.1041.
5. Rabbitts JA and Kain Z. Perioperative Care for Adolescents Undergoing Major Surgery: A Biopsychosocial Conceptual Framework. *Anesthesia and Analgesia* 2019; 129: 1181-1184. DOI: 10.1213/Ane.0000000000004048.
6. Callinan CE, Neuman MD, Lacy KE, et al. The Initiation of Chronic Opioids: A Survey of Chronic Pain Patients. *J Pain* 2017; 18: 360-365. 2016/12/07. DOI: 10.1016/j.jpain.2016.11.001.
7. Shah A, Hayes CJ and Martin BC. Characteristics of Initial Prescription Episodes and Likelihood of Long-Term Opioid Use - United States, 2006-2015. *MMWR Morb Mortal Wkly Rep* 2017; 66: 265-269. 2017/03/17. DOI: 10.15585/mmwr.mm6610a1.
8. Fortier MA, Chou J, Maurer EL, et al. Acute to chronic postoperative pain in children: preliminary findings. *J Pediatr Surg* 2011; 46: 1700-1705. 2011/09/21. DOI: 10.1016/j.jpedsurg.2011.03.074.
9. Kelly RE, Jr., Shamberger RC, Mellins RB, et al. Prospective multicenter study of surgical correction of pectus excavatum: design, perioperative complications, pain, and baseline pulmonary function facilitated by internet-based data collection. *J Am Coll Surg* 2007; 205: 205-216. 2007/07/31. DOI: 10.1016/j.jamcollsurg.2007.03.027.
10. Muhly WT, Beltran RJ, Bielsky A, et al. Perioperative Management and In-Hospital Outcomes After Minimally Invasive Repair of Pectus Excavatum: A Multicenter Registry Report From the Society for Pediatric Anesthesia Improvement Network. *Anesth Analg* 2019; 128: 315-327. 2018/10/23. DOI: 10.1213/ANE.0000000000003829.
11. Groenewald CB, Rabbitts JA, Schroeder DR, et al. Prevalence of moderate-severe pain in hospitalized children. *Paediatr Anaesth* 2012; 22: 661-668. 2012/02/16. DOI: 10.1111/j.1460-9592.2012.03807.x.
12. Kozlowski LJ, Kost-Byerly S, Colantuoni E, et al. Pain prevalence, intensity, assessment and management in a hospitalized pediatric population. *Pain Manag Nurs* 2014; 15: 22-35. 2014/03/08. DOI: 10.1016/j.pmn.2012.04.003.
13. Rabbitts JA, Zhou C, Groenewald CB, et al. Trajectories of postsurgical pain in children: risk factors and impact of late pain recovery on long-term health outcomes after major surgery. *Pain* 2015; 156: 2383-2389. 2015/09/19. DOI: 10.1097/j.pain.000000000000281.
14. Gan TJ. Poorly controlled postoperative pain: prevalence, consequences, and prevention. *J Pain Res* 2017; 10: 2287-2298. 2017/10/14. DOI: 10.2147/JPR.S144066.
15. Peters ML, Sommer M, de Rijke JM, et al. Somatic and psychologic predictors of long-term unfavorable outcome after surgical intervention. *Ann Surg* 2007; 245: 487-494. 2007/04/17. DOI: 10.1097/01.sla.0000245495.79781.65.
16. Tick H, Nielsen A, Pelletier KR, et al. Evidence-Based Nonpharmacologic Strategies for Comprehensive Pain Care: The Consortium Pain Task Force White Paper. *Explore (NY)* 2018; 14: 177-211. 2018/05/08. DOI: 10.1016/j.explore.2018.02.001.

17. Carrougher GJ, Hoffman HG, Nakamura D, et al. The effect of virtual reality on pain and range of motion in adults with burn injuries. *J Burn Care Res* 2009; 30: 785-791. 2009/08/21. DOI: 10.1097/BCR.0b013e3181b485d3.
18. Tashjian VC, Mosadeghi S, Howard AR, et al. Virtual Reality for Management of Pain in Hospitalized Patients: Results of a Controlled Trial. *JMIR Ment Health* 2017; 4: e9. 2017/03/31. DOI: 10.2196/mental.7387.
19. Spiegel B, Fuller G, Lopez M, et al. Virtual reality for management of pain in hospitalized patients: A randomized comparative effectiveness trial. *PLoS One* 2019; 14: e0219115. 2019/08/15. DOI: 10.1371/journal.pone.0219115.
20. Morris LD, Louw QA and Grimmer-Somers K. The effectiveness of virtual reality on reducing pain and anxiety in burn injury patients: a systematic review. *Clin J Pain* 2009; 25: 815-826. 2009/10/24. DOI: 10.1097/AJP.0b013e3181aaa909.
21. Malloy KM and Milling LS. The effectiveness of virtual reality distraction for pain reduction: a systematic review. *Clin Psychol Rev* 2010; 30: 1011-1018. 2010/08/10. DOI: 10.1016/j.cpr.2010.07.001.
22. Hoffman HG, Doctor JN, Patterson DR, et al. Virtual reality as an adjunctive pain control during burn wound care in adolescent patients. *Pain* 2000; 85: 305-309. 2000/02/29.
23. Li A, Montano Z, Chen VJ, et al. Virtual reality and pain management: current trends and future directions. *Pain Manag* 2011; 1: 147-157. 2011/07/23. DOI: 10.2217/pmt.10.15.
24. Garrett B, Taverner T, Masinde W, et al. A rapid evidence assessment of immersive virtual reality as an adjunct therapy in acute pain management in clinical practice. *Clin J Pain* 2014; 30: 1089-1098. 2014/02/19. DOI: 10.1097/AJP.0000000000000064.
25. Gold JI, Kim SH, Kant AJ, et al. Effectiveness of virtual reality for pediatric pain distraction during i.v. placement. *Cyberpsychol Behav* 2006; 9: 207-212. 2006/04/28. DOI: 10.1089/cpb.2006.9.207.
26. Furman E, Jasinevicius TR, Bissada NF, et al. Virtual reality distraction for pain control during periodontal scaling and root planing procedures. *J Am Dent Assoc* 2009; 140: 1508-1516. 2009/12/04.
27. Gold JI and Mahrer NE. Is Virtual Reality Ready for Prime Time in the Medical Space? A Randomized Control Trial of Pediatric Virtual Reality for Acute Procedural Pain Management. *J Pediatr Psychol* 2018; 43: 266-275. 2017/10/21. DOI: 10.1093/jpepsy/jsx129.
28. Indovina P, Barone D, Gallo L, et al. Virtual Reality as a Distraction Intervention to Relieve Pain and Distress During Medical Procedures: A Comprehensive Literature Review. *Clin J Pain* 2018; 34: 858-877. 2018/02/28. DOI: 10.1097/AJP.0000000000000599.
29. Cacau Lde A, Oliveira GU, Maynard LG, et al. The use of the virtual reality as intervention tool in the postoperative of cardiac surgery. *Rev Bras Cir Cardiovasc* 2013; 28: 281-289. 2013/08/14. DOI: 10.5935/1678-9741.20130039.
30. Mosso-Vazquez JL, Gao K, Wiederhold BK, et al. Virtual reality for pain management in cardiac surgery. *Cyberpsychol Behav Soc Netw* 2014; 17: 371-378. 2014/06/04. DOI: 10.1089/cyber.2014.0198.
31. Frey DP, Bauer ME, Bell CL, et al. Virtual Reality Analgesia in Labor: The VRAIL Pilot Study-A Preliminary Randomized Controlled Trial Suggesting Benefit of Immersive Virtual Reality Analgesia in Unmedicated Laboring Women. *Anesth Analg* 2019; 128: e93-e96. 2019/05/17. DOI: 10.1213/ANE.0000000000003649.
32. JahaniShoorab N, Ebrahimzadeh Zagami S, Nahvi A, et al. The Effect of Virtual Reality on Pain in Primiparity Women during Episiotomy Repair: A Randomize Clinical Trial. *Iran J Med Sci* 2015; 40: 219-224. 2015/05/23.
33. Van Ryckeghem DM, Van Damme S, Eccleston C, et al. The efficacy of attentional distraction and sensory monitoring in chronic pain patients: A meta-analysis. *Clin Psychol Rev* 2018; 59: 16-29. 2017/11/12. DOI: 10.1016/j.cpr.2017.10.008.

- 1  
2  
3 34. Gupta A, Scott K and Dukewich M. Innovative Technology Using Virtual Reality in the Treatment  
4 of Pain: Does It Reduce Pain via Distraction, or Is There More to It? *Pain Med* 2018; 19: 151-159.  
5 2017/10/13. DOI: 10.1093/pm/pnx109.  
6  
7 35. Vagnoli L, Bettini A, Amore E, et al. Relaxation-guided imagery reduces perioperative anxiety and  
8 pain in children: a randomized study. *Eur J Pediatr* 2019; 178: 913-921. 2019/04/05. DOI:  
9 10.1007/s00431-019-03376-x.  
10 36. Zaccaro A, Piarulli A, Laurino M, et al. How Breath-Control Can Change Your Life: A Systematic  
11 Review on Psycho-Physiological Correlates of Slow Breathing. *Front Hum Neurosci* 2018; 12: 353.  
12 2018/09/25. DOI: 10.3389/fnhum.2018.00353.  
13 37. Lehrer PM and Gevirtz R. Heart rate variability biofeedback: how and why does it work? *Front*  
14 *Psychol* 2014; 5: 756. 2014/08/08. DOI: 10.3389/fpsyg.2014.00756.  
15 38. Sowder E, Gevirtz R, Shapiro W, et al. Restoration of vagal tone: a possible mechanism for  
16 functional abdominal pain. *Appl Psychophysiol Biofeedback* 2010; 35: 199-206. 2010/03/17. DOI:  
17 10.1007/s10484-010-9128-8.  
18 39. Peng P, Stinson JN, Choiniere M, et al. Dedicated multidisciplinary pain management centres for  
19 children in Canada: the current status. *Can J Anaesth* 2007; 54: 985-991. 2007/12/07. DOI:  
20 10.1007/BF03016632.  
21 40. Harris K and Reid D. The influence of virtual reality play on children's motivation. *Can J Occup*  
22 *Ther* 2005; 72: 21-29. 2005/02/25. DOI: 10.1177/000841740507200107.  
23 41. Prinsloo GE, Derman WE, Lambert MI, et al. The effect of a single session of short duration  
24 biofeedback-induced deep breathing on measures of heart rate variability during laboratory-induced  
25 cognitive stress: a pilot study. *Appl Psychophysiol Biofeedback* 2013; 38: 81-90. 2013/02/26. DOI:  
26 10.1007/s10484-013-9210-0.  
27 42. Crombez G, Bijttebier P, Eccleston C, et al. The child version of the pain catastrophizing scale  
28 (PCS-C): a preliminary validation. *Pain* 2003; 104: 639-646. 2003/08/21.  
29 43. Silverman WK, Goedhart AW, Barrett P, et al. The facets of anxiety sensitivity represented in the  
30 childhood anxiety sensitivity index: confirmatory analyses of factor models from past studies. *J Abnorm*  
31 *Psychol* 2003; 112: 364-374. 2003/08/29.  
32 44. Tsze DS, von Baeyer CL, Pahalyants V, et al. Validity and Reliability of the Verbal Numerical  
33 Rating Scale for Children Aged 4 to 17 Years With Acute Pain. *Ann Emerg Med* 2018; 71: 691-702 e693.  
34 2017/11/07. DOI: 10.1016/j.annemergmed.2017.09.009.  
35 45. Miro J, Castarlenas E and Huguet A. Evidence for the use of a numerical rating scale to assess the  
36 intensity of pediatric pain. *Eur J Pain* 2009; 13: 1089-1095. 2009/09/04. DOI:  
37 10.1016/j.ejpain.2009.07.002.  
38 46. Nichols S and Patel H. Health and safety implications of virtual reality: a review of empirical  
39 evidence. *Appl Ergon* 2002; 33: 251-271. 2002/08/08.  
40  
41  
42  
43  
44  
45  
46  
47  
48  
49  
50  
51  
52  
53  
54  
55  
56  
57  
58  
59  
60

1  
2  
3 **Table 1. Scales and questionnaires used in the study**  
4

5 **Figure 1. Study flow chart (CONSORT Diagram)**  
6

7  
8 **Figure 2. Experimental design of the study**  
9  
10  
11  
12  
13  
14  
15  
16  
17  
18  
19  
20  
21  
22  
23  
24  
25  
26  
27  
28  
29  
30  
31  
32  
33  
34  
35  
36  
37  
38  
39  
40  
41  
42  
43  
44  
45  
46  
47  
48  
49  
50  
51  
52  
53  
54  
55  
56  
57  
58  
59  
60

For peer review only

1  
2  
3 **Table 1. Scales and questionnaires used in the study**  
4  
5  
6  
7

| <b>Table 1. Scales and questionnaires for the study</b>                                                                                                                                                                                                                                                                                                         |
|-----------------------------------------------------------------------------------------------------------------------------------------------------------------------------------------------------------------------------------------------------------------------------------------------------------------------------------------------------------------|
| <b><u>Numerical Rating Scale (NRS)</u></b> . Numerical rating scale where children are asked to give a number on a scale of 0 to 10 of how bad their pain hurts, with 0 being no pain and 10 being the worst pain of their life.                                                                                                                                |
| <b><u>Pain Catastrophizing Scale for Children (PCS-C)</u></b> . Children rate 13 items assessing rumination, magnification, and helplessness related to thoughts about pain. PCS summary scores can be interpreted as low (0 to 14), moderate (15 to 25), and high ( $\geq 26$ ). Internal reliability for our VR-D pilot data was 0.94 (Cronbach's $\alpha$ ). |
| <b><u>Child Anxiety Sensitivity Index (CASI)</u></b> . 18-item self-report tool designed to measure symptoms of anxiety in children and adolescents, with total scores ranging from 18-54. Internal reliability for our VR-D pilot data was 0.84 (Cronbach's $\alpha$ ).                                                                                        |



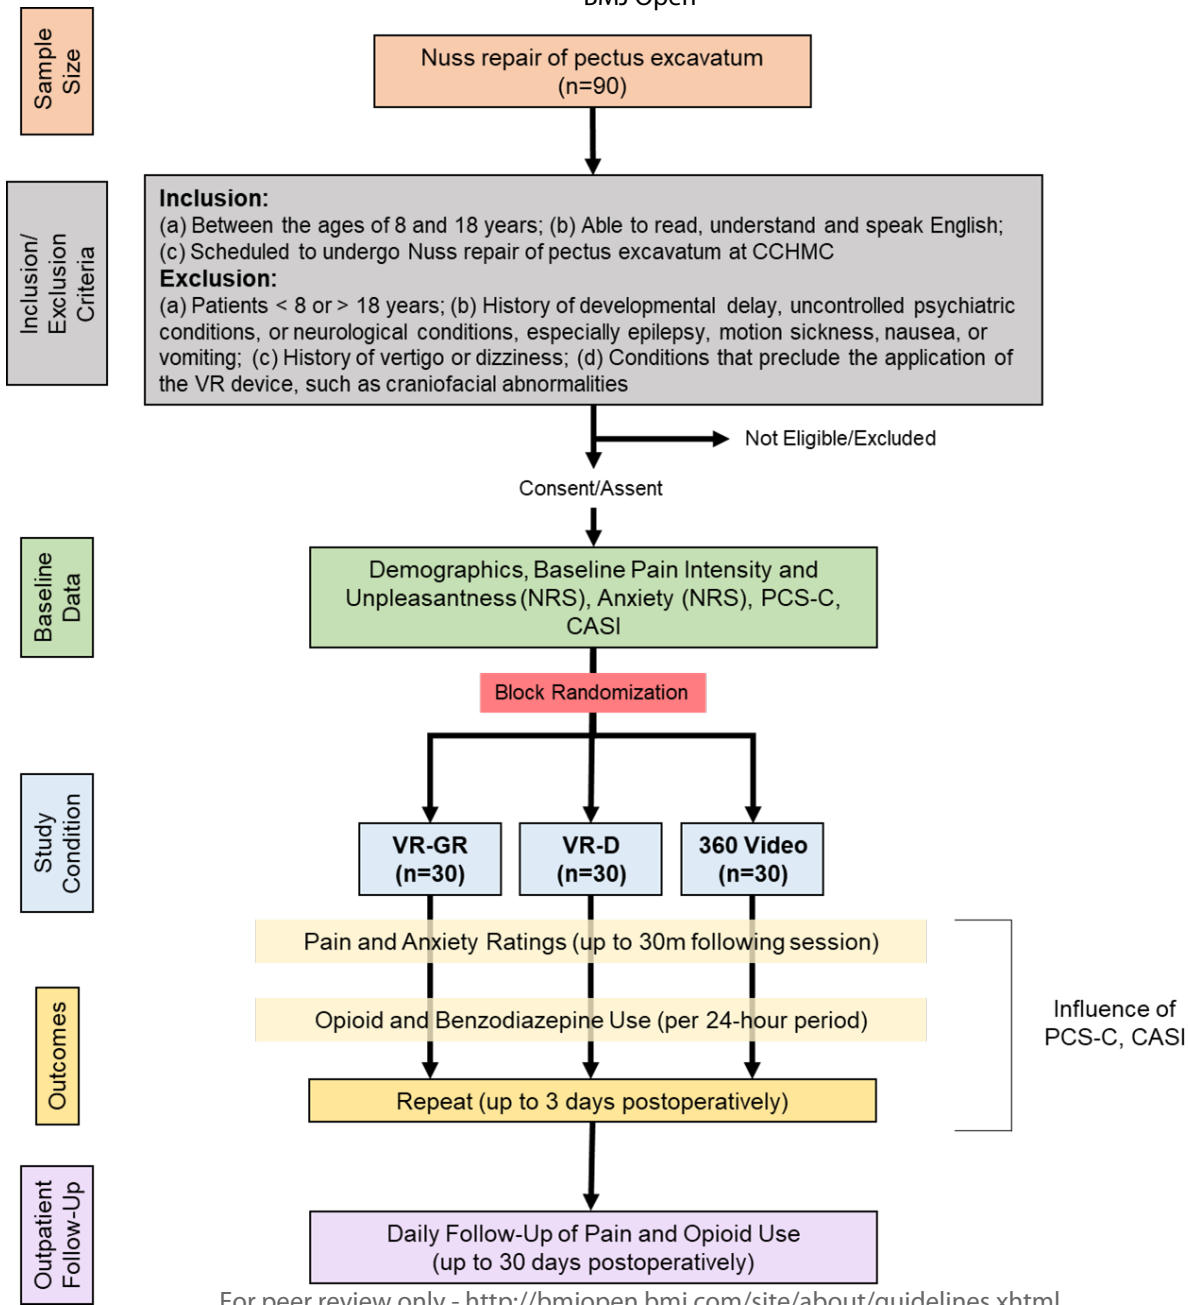

1  
2  
3  
4  
5  
6  
7  
8  
9  
10  
11  
12  
13  
14  
15  
16  
17  
18  
19  
20  
21  
22  
23  
24  
25  
26  
27  
28  
29  
30  
31  
32  
33  
34  
35  
36  
37  
38  
39  
40  
41

1  
2  
3  
4  
5  
6  
7  
8  
9  
10  
11  
12  
13  
14  
15  
16  
17  
18  
19

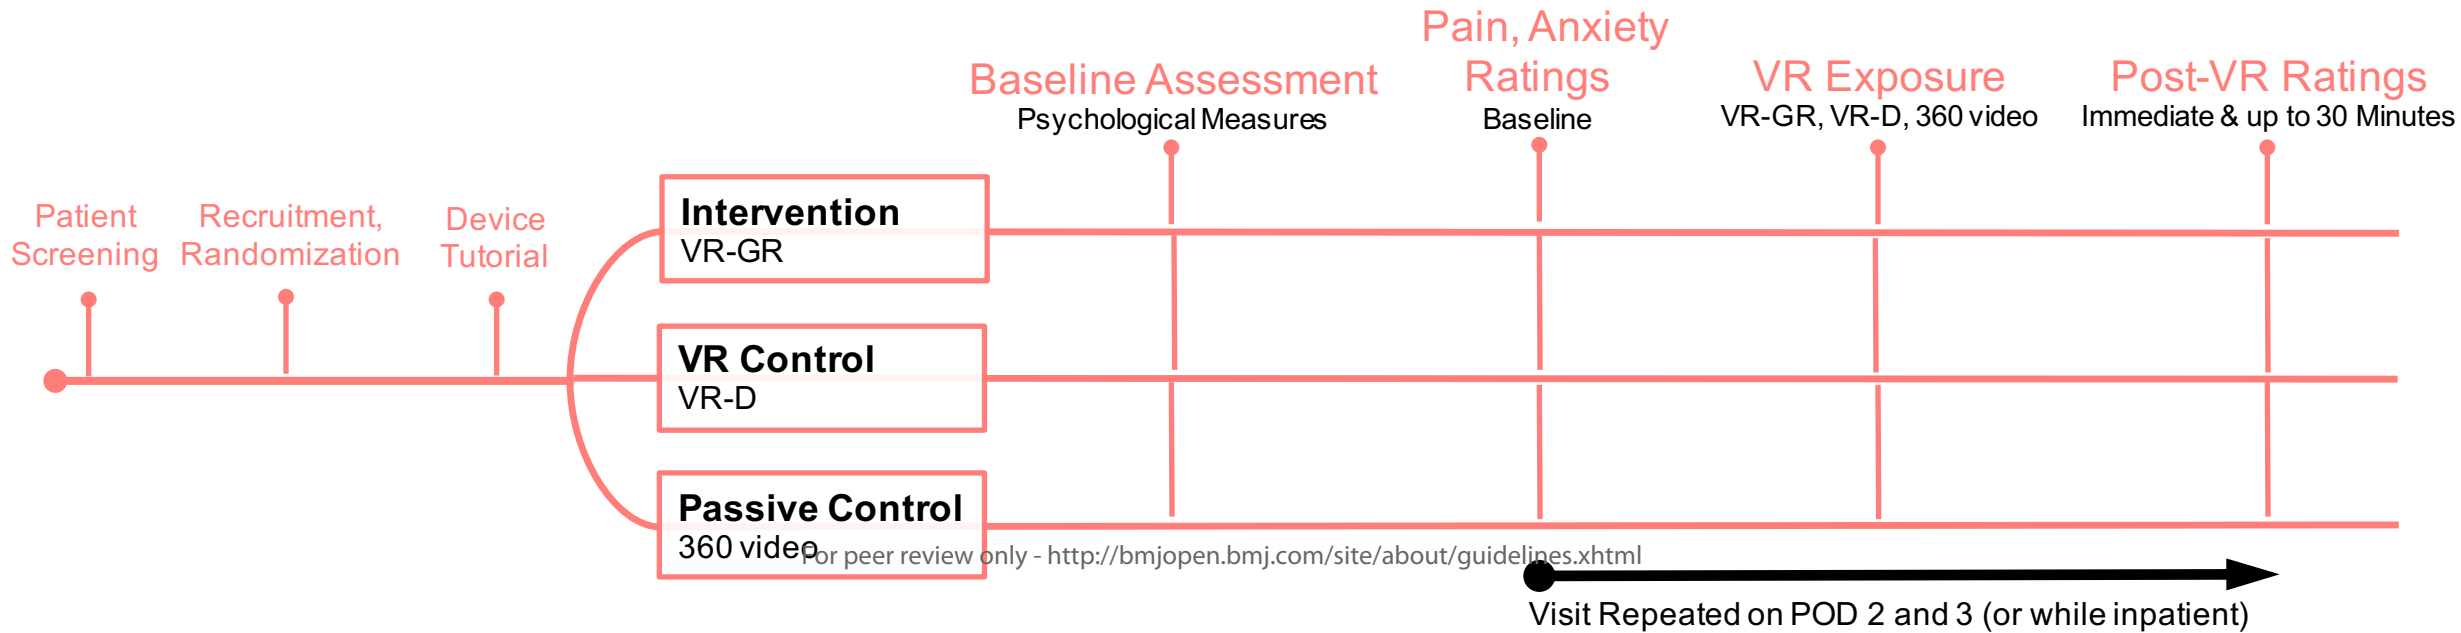

# Reporting checklist for protocol of a clinical trial.

Based on the SPIRIT guidelines.

## Instructions to authors

Complete this checklist by entering the page numbers from your manuscript where readers will find each of the items listed below.

Your article may not currently address all the items on the checklist. Please modify your text to include the missing information. If you are certain that an item does not apply, please write "n/a" and provide a short explanation.

Upload your completed checklist as an extra file when you submit to a journal.

In your methods section, say that you used the SPIRIT reporting guidelines, and cite them as:

Chan A-W, Tetzlaff JM, Altman DG, Laupacis A, Gøtzsche PC, Krleža-Jerić K, Hróbjartsson A, Mann H, Dickersin K, Berlin J, Doré C, Parulekar W, Summerskill W, Groves T, Schulz K, Sox H, Rockhold FW, Rennie D, Moher D. SPIRIT 2013 Statement: Defining standard protocol items for clinical trials. *Ann Intern Med.* 2013;158(3):200-207

|                                             |                     | Reporting Item                                                                                               | Page Number |
|---------------------------------------------|---------------------|--------------------------------------------------------------------------------------------------------------|-------------|
| <b>Administrative information</b>           |                     |                                                                                                              |             |
| Title                                       | <a href="#">#1</a>  | Descriptive title identifying the study design, population, interventions, and, if applicable, trial acronym | 1           |
| Trial registration                          | <a href="#">#2a</a> | Trial identifier and registry name. If not yet registered, name of intended registry                         | 2           |
| Trial registration: data set                | <a href="#">#2b</a> | All items from the World Health Organization Trial Registration Data Set                                     | 2, 6        |
| Protocol version                            | <a href="#">#3</a>  | Date and version identifier                                                                                  | 12          |
| Funding                                     | <a href="#">#4</a>  | Sources and types of financial, material, and other support                                                  | 13          |
| Roles and responsibilities: contributorship | <a href="#">#5a</a> | Names, affiliations, and roles of protocol contributors                                                      | 1, 13       |

|    |                           |                     |                                                                      |      |
|----|---------------------------|---------------------|----------------------------------------------------------------------|------|
| 1  | Roles and                 | <a href="#">#5b</a> | Name and contact information for the trial sponsor                   | n/a  |
| 2  | responsibilities:         |                     |                                                                      |      |
| 3  | sponsor contact           |                     |                                                                      |      |
| 4  | information               |                     |                                                                      |      |
| 5  |                           |                     |                                                                      |      |
| 6  |                           |                     |                                                                      |      |
| 7  |                           |                     |                                                                      |      |
| 8  | Roles and                 | <a href="#">#5c</a> | Role of study sponsor and funders, if any, in study design;          | 13   |
| 9  | responsibilities:         |                     | collection, management, analysis, and interpretation of data;        |      |
| 10 | sponsor and funder        |                     | writing of the report; and the decision to submit the report for     |      |
| 11 |                           |                     | publication, including whether they will have ultimate authority     |      |
| 12 |                           |                     | over any of these activities                                         |      |
| 13 |                           |                     |                                                                      |      |
| 14 |                           |                     |                                                                      |      |
| 15 |                           |                     |                                                                      |      |
| 16 | Roles and                 | <a href="#">#5d</a> | Composition, roles, and responsibilities of the coordinating centre, | n/a  |
| 17 | responsibilities:         |                     | steering committee, endpoint adjudication committee, data            |      |
| 18 | committees                |                     | management team, and other individuals or groups overseeing the      |      |
| 19 |                           |                     | trial, if applicable (see Item 21a for data monitoring committee)    |      |
| 20 |                           |                     |                                                                      |      |
| 21 |                           |                     |                                                                      |      |
| 22 |                           |                     |                                                                      |      |
| 23 | <b>Introduction</b>       |                     |                                                                      |      |
| 24 |                           |                     |                                                                      |      |
| 25 | Background and            | <a href="#">#6a</a> | Description of research question and justification for undertaking   | 4-5  |
| 26 | rationale                 |                     | the trial, including summary of relevant studies (published and      |      |
| 27 |                           |                     | unpublished) examining benefits and harms for each intervention      |      |
| 28 |                           |                     |                                                                      |      |
| 29 |                           |                     |                                                                      |      |
| 30 | Background and            | <a href="#">#6b</a> | Explanation for choice of comparators                                | 4-5  |
| 31 | rationale: choice of      |                     |                                                                      |      |
| 32 | comparators               |                     |                                                                      |      |
| 33 |                           |                     |                                                                      |      |
| 34 |                           |                     |                                                                      |      |
| 35 |                           |                     |                                                                      |      |
| 36 | Objectives                | <a href="#">#7</a>  | Specific objectives or hypotheses                                    | 5    |
| 37 |                           |                     |                                                                      |      |
| 38 | Trial design              | <a href="#">#8</a>  | Description of trial design including type of trial (eg, parallel    | 5, 6 |
| 39 |                           |                     | group, crossover, factorial, single group), allocation ratio, and    |      |
| 40 |                           |                     | framework (eg, superiority, equivalence, non-inferiority,            |      |
| 41 |                           |                     | exploratory)                                                         |      |
| 42 |                           |                     |                                                                      |      |
| 43 |                           |                     |                                                                      |      |
| 44 |                           |                     |                                                                      |      |
| 45 | <b>Methods:</b>           |                     |                                                                      |      |
| 46 | <b>Participants,</b>      |                     |                                                                      |      |
| 47 | <b>interventions, and</b> |                     |                                                                      |      |
| 48 | <b>outcomes</b>           |                     |                                                                      |      |
| 49 |                           |                     |                                                                      |      |
| 50 |                           |                     |                                                                      |      |
| 51 | Study setting             | <a href="#">#9</a>  | Description of study settings (eg, community clinic, academic        | 6    |
| 52 |                           |                     | hospital) and list of countries where data will be collected.        |      |
| 53 |                           |                     | Reference to where list of study sites can be obtained               |      |
| 54 |                           |                     |                                                                      |      |
| 55 |                           |                     |                                                                      |      |
| 56 |                           |                     |                                                                      |      |
| 57 | Eligibility criteria      | <a href="#">#10</a> | Inclusion and exclusion criteria for participants. If applicable,    | 7    |
| 58 |                           |                     | eligibility criteria for study centres and individuals who will      |      |
| 59 |                           |                     |                                                                      |      |
| 60 |                           |                     |                                                                      |      |

perform the interventions (eg, surgeons, psychotherapists)

|    |                      |                      |                                                                       |
|----|----------------------|----------------------|-----------------------------------------------------------------------|
| 1  |                      |                      |                                                                       |
| 2  |                      |                      |                                                                       |
| 3  | Interventions:       | <a href="#">#11a</a> | Interventions for each group with sufficient detail to allow          |
| 4  | description          |                      | replication, including how and when they will be administered         |
| 5  |                      |                      |                                                                       |
| 6  | Interventions:       | <a href="#">#11b</a> | Criteria for discontinuing or modifying allocated interventions for a |
| 7  | modifications        |                      | given trial participant (eg, drug dose change in response to harms,   |
| 8  |                      |                      | participant request, or improving / worsening disease)                |
| 9  |                      |                      |                                                                       |
| 10 |                      |                      |                                                                       |
| 11 | Interventions:       | <a href="#">#11c</a> | Strategies to improve adherence to intervention protocols, and any    |
| 12 | adherence            |                      | procedures for monitoring adherence (eg, drug tablet return;          |
| 13 |                      |                      | laboratory tests)                                                     |
| 14 |                      |                      |                                                                       |
| 15 |                      |                      |                                                                       |
| 16 |                      |                      |                                                                       |
| 17 | Interventions:       | <a href="#">#11d</a> | Relevant concomitant care and interventions that are permitted or     |
| 18 | concomitant care     |                      | prohibited during the trial                                           |
| 19 |                      |                      |                                                                       |
| 20 |                      |                      |                                                                       |
| 21 | Outcomes             | <a href="#">#12</a>  | Primary, secondary, and other outcomes, including the specific        |
| 22 |                      |                      | measurement variable (eg, systolic blood pressure), analysis metric   |
| 23 |                      |                      | (eg, change from baseline, final value, time to event), method of     |
| 24 |                      |                      | aggregation (eg, median, proportion), and time point for each         |
| 25 |                      |                      | outcome. Explanation of the clinical relevance of chosen efficacy     |
| 26 |                      |                      | and harm outcomes is strongly recommended                             |
| 27 |                      |                      |                                                                       |
| 28 |                      |                      |                                                                       |
| 29 |                      |                      |                                                                       |
| 30 | Participant timeline | <a href="#">#13</a>  | Time schedule of enrolment, interventions (including any run-ins      |
| 31 |                      |                      | and washouts), assessments, and visits for participants. A            |
| 32 |                      |                      | schematic diagram is highly recommended (see Figure)                  |
| 33 |                      |                      |                                                                       |
| 34 |                      |                      |                                                                       |
| 35 |                      |                      |                                                                       |
| 36 | Sample size          | <a href="#">#14</a>  | Estimated number of participants needed to achieve study              |
| 37 |                      |                      | objectives and how it was determined, including clinical and          |
| 38 |                      |                      | statistical assumptions supporting any sample size calculations       |
| 39 |                      |                      |                                                                       |
| 40 |                      |                      |                                                                       |
| 41 | Recruitment          | <a href="#">#15</a>  | Strategies for achieving adequate participant enrolment to reach      |
| 42 |                      |                      | target sample size                                                    |
| 43 |                      |                      |                                                                       |
| 44 |                      |                      |                                                                       |

## Methods: Assignment of interventions (for controlled trials)

|    |                      |                      |                                                                      |
|----|----------------------|----------------------|----------------------------------------------------------------------|
| 45 |                      |                      |                                                                      |
| 46 |                      |                      |                                                                      |
| 47 |                      |                      |                                                                      |
| 48 |                      |                      |                                                                      |
| 49 |                      |                      |                                                                      |
| 50 | Allocation: sequence | <a href="#">#16a</a> | Method of generating the allocation sequence (eg, computer-          |
| 51 | generation           |                      | generated random numbers), and list of any factors for               |
| 52 |                      |                      | stratification. To reduce predictability of a random sequence,       |
| 53 |                      |                      | details of any planned restriction (eg, blocking) should be provided |
| 54 |                      |                      | in a separate document that is unavailable to those who enrol        |
| 55 |                      |                      | participants or assign interventions                                 |
| 56 |                      |                      |                                                                      |
| 57 |                      |                      |                                                                      |
| 58 |                      |                      |                                                                      |
| 59 |                      |                      |                                                                      |
| 60 |                      |                      |                                                                      |

|    |                        |                      |                                                                                                                                                                                                                                                                                                                                                                                                              |       |
|----|------------------------|----------------------|--------------------------------------------------------------------------------------------------------------------------------------------------------------------------------------------------------------------------------------------------------------------------------------------------------------------------------------------------------------------------------------------------------------|-------|
| 1  | Allocation concealment | <a href="#">#16b</a> | Mechanism of implementing the allocation sequence (eg, central telephone; sequentially numbered, opaque, sealed envelopes), describing any steps to conceal the sequence until interventions are assigned                                                                                                                                                                                                    | n/a   |
| 2  | mechanism              |                      |                                                                                                                                                                                                                                                                                                                                                                                                              |       |
| 3  |                        |                      |                                                                                                                                                                                                                                                                                                                                                                                                              |       |
| 4  |                        |                      |                                                                                                                                                                                                                                                                                                                                                                                                              |       |
| 5  |                        |                      |                                                                                                                                                                                                                                                                                                                                                                                                              |       |
| 6  |                        |                      |                                                                                                                                                                                                                                                                                                                                                                                                              |       |
| 7  |                        |                      |                                                                                                                                                                                                                                                                                                                                                                                                              |       |
| 8  | Allocation:            | <a href="#">#16c</a> | Who will generate the allocation sequence, who will enrol participants, and who will assign participants to interventions                                                                                                                                                                                                                                                                                    | 9     |
| 9  | implementation         |                      |                                                                                                                                                                                                                                                                                                                                                                                                              |       |
| 10 |                        |                      |                                                                                                                                                                                                                                                                                                                                                                                                              |       |
| 11 | Blinding (masking)     | <a href="#">#17a</a> | Who will be blinded after assignment to interventions (eg, trial participants, care providers, outcome assessors, data analysts), and how                                                                                                                                                                                                                                                                    | n/a   |
| 12 |                        |                      |                                                                                                                                                                                                                                                                                                                                                                                                              |       |
| 13 |                        |                      |                                                                                                                                                                                                                                                                                                                                                                                                              |       |
| 14 |                        |                      |                                                                                                                                                                                                                                                                                                                                                                                                              |       |
| 15 |                        |                      |                                                                                                                                                                                                                                                                                                                                                                                                              |       |
| 16 |                        |                      |                                                                                                                                                                                                                                                                                                                                                                                                              |       |
| 17 | Blinding (masking):    | <a href="#">#17b</a> | If blinded, circumstances under which unblinding is permissible, and procedure for revealing a participant's allocated intervention during the trial                                                                                                                                                                                                                                                         | n/a   |
| 18 | emergency unblinding   |                      |                                                                                                                                                                                                                                                                                                                                                                                                              |       |
| 19 |                        |                      |                                                                                                                                                                                                                                                                                                                                                                                                              |       |
| 20 |                        |                      |                                                                                                                                                                                                                                                                                                                                                                                                              |       |
| 21 |                        |                      |                                                                                                                                                                                                                                                                                                                                                                                                              |       |
| 22 | <b>Methods: Data</b>   |                      |                                                                                                                                                                                                                                                                                                                                                                                                              |       |
| 23 | <b>collection,</b>     |                      |                                                                                                                                                                                                                                                                                                                                                                                                              |       |
| 24 | <b>management, and</b> |                      |                                                                                                                                                                                                                                                                                                                                                                                                              |       |
| 25 | <b>analysis</b>        |                      |                                                                                                                                                                                                                                                                                                                                                                                                              |       |
| 26 |                        |                      |                                                                                                                                                                                                                                                                                                                                                                                                              |       |
| 27 |                        |                      |                                                                                                                                                                                                                                                                                                                                                                                                              |       |
| 28 |                        |                      |                                                                                                                                                                                                                                                                                                                                                                                                              |       |
| 29 | Data collection plan   | <a href="#">#18a</a> | Plans for assessment and collection of outcome, baseline, and other trial data, including any related processes to promote data quality (eg, duplicate measurements, training of assessors) and a description of study instruments (eg, questionnaires, laboratory tests) along with their reliability and validity, if known. Reference to where data collection forms can be found, if not in the protocol | 9-10  |
| 30 |                        |                      |                                                                                                                                                                                                                                                                                                                                                                                                              |       |
| 31 |                        |                      |                                                                                                                                                                                                                                                                                                                                                                                                              |       |
| 32 |                        |                      |                                                                                                                                                                                                                                                                                                                                                                                                              |       |
| 33 |                        |                      |                                                                                                                                                                                                                                                                                                                                                                                                              |       |
| 34 |                        |                      |                                                                                                                                                                                                                                                                                                                                                                                                              |       |
| 35 |                        |                      |                                                                                                                                                                                                                                                                                                                                                                                                              |       |
| 36 |                        |                      |                                                                                                                                                                                                                                                                                                                                                                                                              |       |
| 37 |                        |                      |                                                                                                                                                                                                                                                                                                                                                                                                              |       |
| 38 |                        |                      |                                                                                                                                                                                                                                                                                                                                                                                                              |       |
| 39 | Data collection plan:  | <a href="#">#18b</a> | Plans to promote participant retention and complete follow-up, including list of any outcome data to be collected for participants who discontinue or deviate from intervention protocols                                                                                                                                                                                                                    | 9     |
| 40 | retention              |                      |                                                                                                                                                                                                                                                                                                                                                                                                              |       |
| 41 |                        |                      |                                                                                                                                                                                                                                                                                                                                                                                                              |       |
| 42 |                        |                      |                                                                                                                                                                                                                                                                                                                                                                                                              |       |
| 43 |                        |                      |                                                                                                                                                                                                                                                                                                                                                                                                              |       |
| 44 | Data management        | <a href="#">#19</a>  | Plans for data entry, coding, security, and storage, including any related processes to promote data quality (eg, double data entry; range checks for data values). Reference to where details of data management procedures can be found, if not in the protocol                                                                                                                                            | 12    |
| 45 |                        |                      |                                                                                                                                                                                                                                                                                                                                                                                                              |       |
| 46 |                        |                      |                                                                                                                                                                                                                                                                                                                                                                                                              |       |
| 47 |                        |                      |                                                                                                                                                                                                                                                                                                                                                                                                              |       |
| 48 |                        |                      |                                                                                                                                                                                                                                                                                                                                                                                                              |       |
| 49 |                        |                      |                                                                                                                                                                                                                                                                                                                                                                                                              |       |
| 50 |                        |                      |                                                                                                                                                                                                                                                                                                                                                                                                              |       |
| 51 | Statistics: outcomes   | <a href="#">#20a</a> | Statistical methods for analysing primary and secondary outcomes. Reference to where other details of the statistical analysis plan can be found, if not in the protocol                                                                                                                                                                                                                                     | 10-11 |
| 52 |                        |                      |                                                                                                                                                                                                                                                                                                                                                                                                              |       |
| 53 |                        |                      |                                                                                                                                                                                                                                                                                                                                                                                                              |       |
| 54 |                        |                      |                                                                                                                                                                                                                                                                                                                                                                                                              |       |
| 55 |                        |                      |                                                                                                                                                                                                                                                                                                                                                                                                              |       |
| 56 | Statistics: additional | <a href="#">#20b</a> | Methods for any additional analyses (eg, subgroup and adjusted analyses)                                                                                                                                                                                                                                                                                                                                     | n/a   |
| 57 | analyses               |                      |                                                                                                                                                                                                                                                                                                                                                                                                              |       |
| 58 |                        |                      |                                                                                                                                                                                                                                                                                                                                                                                                              |       |
| 59 |                        |                      |                                                                                                                                                                                                                                                                                                                                                                                                              |       |
| 60 |                        |                      |                                                                                                                                                                                                                                                                                                                                                                                                              |       |

|    |                            |                      |                                                                         |       |
|----|----------------------------|----------------------|-------------------------------------------------------------------------|-------|
| 1  | Statistics: analysis       | <a href="#">#20c</a> | Definition of analysis population relating to protocol non-             | 11    |
| 2  | population and missing     |                      | adherence (eg, as randomised analysis), and any statistical methods     |       |
| 3  | data                       |                      | to handle missing data (eg, multiple imputation)                        |       |
| 4  |                            |                      |                                                                         |       |
| 5  |                            |                      |                                                                         |       |
| 6  | <b>Methods: Monitoring</b> |                      |                                                                         |       |
| 7  |                            |                      |                                                                         |       |
| 8  | Data monitoring:           | <a href="#">#21a</a> | Composition of data monitoring committee (DMC); summary of its          | 12    |
| 9  | formal committee           |                      | role and reporting structure; statement of whether it is independent    |       |
| 10 |                            |                      | from the sponsor and competing interests; and reference to where        |       |
| 11 |                            |                      | further details about its charter can be found, if not in the protocol. |       |
| 12 |                            |                      | Alternatively, an explanation of why a DMC is not needed                |       |
| 13 |                            |                      |                                                                         |       |
| 14 |                            |                      |                                                                         |       |
| 15 |                            |                      |                                                                         |       |
| 16 |                            |                      |                                                                         |       |
| 17 | Data monitoring:           | <a href="#">#21b</a> | Description of any interim analyses and stopping guidelines,            | 12-13 |
| 18 | interim analysis           |                      | including who will have access to these interim results and make        |       |
| 19 |                            |                      | the final decision to terminate the trial                               |       |
| 20 |                            |                      |                                                                         |       |
| 21 |                            |                      |                                                                         |       |
| 22 | Harms                      | <a href="#">#22</a>  | Plans for collecting, assessing, reporting, and managing solicited      | 12-13 |
| 23 |                            |                      | and spontaneously reported adverse events and other unintended          |       |
| 24 |                            |                      | effects of trial interventions or trial conduct                         |       |
| 25 |                            |                      |                                                                         |       |
| 26 |                            |                      |                                                                         |       |
| 27 | Auditing                   | <a href="#">#23</a>  | Frequency and procedures for auditing trial conduct, if any, and        | 12    |
| 28 |                            |                      | whether the process will be independent from investigators and the      |       |
| 29 |                            |                      | sponsor                                                                 |       |
| 30 |                            |                      |                                                                         |       |
| 31 |                            |                      |                                                                         |       |
| 32 |                            |                      |                                                                         |       |
| 33 | <b>Ethics and</b>          |                      |                                                                         |       |
| 34 | <b>dissemination</b>       |                      |                                                                         |       |
| 35 |                            |                      |                                                                         |       |
| 36 |                            |                      |                                                                         |       |
| 37 | Research ethics            | <a href="#">#24</a>  | Plans for seeking research ethics committee / institutional review      | 2, 12 |
| 38 | approval                   |                      | board (REC / IRB) approval                                              |       |
| 39 |                            |                      |                                                                         |       |
| 40 |                            |                      |                                                                         |       |
| 41 | Protocol amendments        | <a href="#">#25</a>  | Plans for communicating important protocol modifications (eg,           | 12    |
| 42 |                            |                      | changes to eligibility criteria, outcomes, analyses) to relevant        |       |
| 43 |                            |                      | parties (eg, investigators, REC / IRBs, trial participants, trial       |       |
| 44 |                            |                      | registries, journals, regulators)                                       |       |
| 45 |                            |                      |                                                                         |       |
| 46 |                            |                      |                                                                         |       |
| 47 | Consent or assent          | <a href="#">#26a</a> | Who will obtain informed consent or assent from potential trial         | 9     |
| 48 |                            |                      | participants or authorised surrogates, and how (see Item 32)            |       |
| 49 |                            |                      |                                                                         |       |
| 50 |                            |                      |                                                                         |       |
| 51 | Consent or assent:         | <a href="#">#26b</a> | Additional consent provisions for collection and use of participant     | n/a   |
| 52 | ancillary studies          |                      | data and biological specimens in ancillary studies, if applicable       |       |
| 53 |                            |                      |                                                                         |       |
| 54 |                            |                      |                                                                         |       |
| 55 | Confidentiality            | <a href="#">#27</a>  | How personal information about potential and enrolled participants      | 12    |
| 56 |                            |                      | will be collected, shared, and maintained in order to protect           |       |
| 57 |                            |                      | confidentiality before, during, and after the trial                     |       |
| 58 |                            |                      |                                                                         |       |
| 59 |                            |                      |                                                                         |       |
| 60 |                            |                      |                                                                         |       |

|    |                                             |                      |                                                                                                                                                                                                                                                                                     |     |
|----|---------------------------------------------|----------------------|-------------------------------------------------------------------------------------------------------------------------------------------------------------------------------------------------------------------------------------------------------------------------------------|-----|
| 1  | Declaration of interests                    | <a href="#">#28</a>  | Financial and other competing interests for principal investigators for the overall trial and each study site                                                                                                                                                                       | 14  |
| 2  |                                             |                      |                                                                                                                                                                                                                                                                                     |     |
| 3  |                                             |                      |                                                                                                                                                                                                                                                                                     |     |
| 4  |                                             |                      |                                                                                                                                                                                                                                                                                     |     |
| 5  | Data access                                 | <a href="#">#29</a>  | Statement of who will have access to the final trial dataset, and disclosure of contractual agreements that limit such access for investigators                                                                                                                                     | 12  |
| 6  |                                             |                      |                                                                                                                                                                                                                                                                                     |     |
| 7  |                                             |                      |                                                                                                                                                                                                                                                                                     |     |
| 8  |                                             |                      |                                                                                                                                                                                                                                                                                     |     |
| 9  |                                             |                      |                                                                                                                                                                                                                                                                                     |     |
| 10 | Ancillary and post trial care               | <a href="#">#30</a>  | Provisions, if any, for ancillary and post-trial care, and for compensation to those who suffer harm from trial participation                                                                                                                                                       | n/a |
| 11 |                                             |                      |                                                                                                                                                                                                                                                                                     |     |
| 12 |                                             |                      |                                                                                                                                                                                                                                                                                     |     |
| 13 |                                             |                      |                                                                                                                                                                                                                                                                                     |     |
| 14 | Dissemination policy: trial results         | <a href="#">#31a</a> | Plans for investigators and sponsor to communicate trial results to participants, healthcare professionals, the public, and other relevant groups (eg, via publication, reporting in results databases, or other data sharing arrangements), including any publication restrictions | 13  |
| 15 |                                             |                      |                                                                                                                                                                                                                                                                                     |     |
| 16 |                                             |                      |                                                                                                                                                                                                                                                                                     |     |
| 17 |                                             |                      |                                                                                                                                                                                                                                                                                     |     |
| 18 |                                             |                      |                                                                                                                                                                                                                                                                                     |     |
| 19 |                                             |                      |                                                                                                                                                                                                                                                                                     |     |
| 20 |                                             |                      |                                                                                                                                                                                                                                                                                     |     |
| 21 | Dissemination policy: authorship            | <a href="#">#31b</a> | Authorship eligibility guidelines and any intended use of professional writers                                                                                                                                                                                                      | 13  |
| 22 |                                             |                      |                                                                                                                                                                                                                                                                                     |     |
| 23 |                                             |                      |                                                                                                                                                                                                                                                                                     |     |
| 24 | Dissemination policy: reproducible research | <a href="#">#31c</a> | Plans, if any, for granting public access to the full protocol, participant-level dataset, and statistical code                                                                                                                                                                     | 13  |
| 25 |                                             |                      |                                                                                                                                                                                                                                                                                     |     |
| 26 |                                             |                      |                                                                                                                                                                                                                                                                                     |     |
| 27 |                                             |                      |                                                                                                                                                                                                                                                                                     |     |
| 28 | <b>Appendices</b>                           |                      |                                                                                                                                                                                                                                                                                     |     |
| 29 |                                             |                      |                                                                                                                                                                                                                                                                                     |     |
| 30 |                                             |                      |                                                                                                                                                                                                                                                                                     |     |
| 31 | Informed consent materials                  | <a href="#">#32</a>  | Model consent form and other related documentation given to participants and authorised surrogates                                                                                                                                                                                  | 12  |
| 32 |                                             |                      |                                                                                                                                                                                                                                                                                     |     |
| 33 |                                             |                      |                                                                                                                                                                                                                                                                                     |     |
| 34 |                                             |                      |                                                                                                                                                                                                                                                                                     |     |
| 35 | Biological specimens                        | <a href="#">#33</a>  | Plans for collection, laboratory evaluation, and storage of biological specimens for genetic or molecular analysis in the current trial and for future use in ancillary studies, if applicable                                                                                      | n/a |
| 36 |                                             |                      |                                                                                                                                                                                                                                                                                     |     |
| 37 |                                             |                      |                                                                                                                                                                                                                                                                                     |     |
| 38 |                                             |                      |                                                                                                                                                                                                                                                                                     |     |
| 39 |                                             |                      |                                                                                                                                                                                                                                                                                     |     |

40 The SPIRIT checklist is distributed under the terms of the Creative Commons Attribution License CC-BY-ND  
 41 3.0. This checklist was completed on 08. May 2020 using <https://www.goodreports.org/>, a tool made by the  
 42 [EQUATOR Network](#) in collaboration with [Penelope.ai](#)  
 43  
 44  
 45  
 46  
 47  
 48  
 49  
 50  
 51  
 52  
 53  
 54  
 55  
 56  
 57  
 58  
 59  
 60
